# Supplementary material
Source: PubMed Central journal article supplement (PMC5639465)
Supplement: ja7b07344_si_001.pdf [file ja7b07344_si_001.pdf]

## Supporting information for

# Lewis acid enabled copper catalysed asymmetric synthesis of chiral $\beta$ -substituted amides

Mamen Rodríguez-Fernández<sup>†§</sup>, Xingchen Yan<sup>†§</sup>, Juan F. Collados<sup>†§</sup>, Paul B. White<sup>‡</sup>, Syuzanna R. Harutyunyan<sup>†\*</sup>

<sup>†</sup>Stratingh Institute for Chemistry, University of Groningen, Nijenborgh 4, 9747 AG, Groningen, The Netherlands

<sup>‡</sup>Institute for Molecules and Materials, Radboud University, Heyendaalseweg 135, 6525 AJ, Nijmegen, The Netherlands

## Table of Contents:

|                                                                                                                                    |      |
|------------------------------------------------------------------------------------------------------------------------------------|------|
| 1. General experimental information                                                                                                | S3   |
| 2. Chemicals                                                                                                                       | S4   |
| 3. Determination of absolute configuration                                                                                         | S4   |
| 4. Optimization of reaction conditions                                                                                             | S5   |
| 5. ( <i>E</i> )/( <i>Z</i> ) Isomerization experiments                                                                             | S7   |
| 6. NMR spectroscopy based mechanistic studies                                                                                      | S14  |
| 7. Synthesis of enamides: procedure and characterization of products                                                               | S46  |
| 8. Cu- ACA of Grignard reagents to enamides: General procedures, preparative scale, catalyst recovery, CA product characterisation | S62  |
| 9. Deprotection of PMB protected amide                                                                                             | S130 |
| 10. Transformation of amide into $\beta$ - and $\gamma$ -branched amines                                                           | S132 |
| 11. Catalytic ACA followed by intramolecular trapping                                                                              | S136 |
| 12. References                                                                                                                     | S138 |

## 1. General experimental information

All reactions using oxygen- and/or moisture-sensitive materials were carried out with anhydrous solvents (*vide infra*) under a nitrogen atmosphere using oven-dried glassware and standard Schlenk techniques. Reactions were monitored by  $^1\text{H}$  NMR. Purification of the products was performed by column chromatography using Merck 60 Å 230-400 mesh silica gel. Components were visualized by UV and  $\text{KMnO}_4$  staining. NMR data was collected on Varian VXR400 ( $^1\text{H}$  at 400.0 MHz;  $^{13}\text{C}$  at 100.58 MHz) equipped with a 5 mm *z*-gradient broadband probe. Chemical shifts are reported in parts per million (ppm) relative to residual solvent peak ( $\text{CDCl}_3$ ,  $^1\text{H}$ : 7.26 ppm;  $^{13}\text{C}$ : 77.16 ppm;  $\text{D}_2\text{O}$ ,  $^1\text{H}$ : 4.79 ppm). Coupling constants are reported in Hertz. Multiplicity is reported with the usual abbreviations (s: singlet, br s: broad singlet, d: doublet, dd: doublet of doublets, t: triplet, tdt: triplet doublet of triplets, tqt: triplet quartet of triplets, ttq: triplet triplet of quartets, q: quartet, quint: quintet, sex: sextet, hept: heptet, m: multiplet, if an apparent multiplicity is observed the actual multiplicity will be noted in brackets). Variable-temperature NMR spectra were acquired on a Bruker Avance III spectrometer paired with an Ascend 400 MHz magnet and BBFO dual-resonance probe. All temperatures were calibrated prior to acquisition with an external pure MeOH reference.  $^1\text{H}$  TOCSY and ROESY experiments were carried out with 9.6 kHz and 4.54 kHz spinlocking fields, and the ROESY mix time was set to 400 ms.  $^1\text{H}$ - $^{19}\text{F}$  HOESY experiments utilized a mix time of 350 ms.  $^1\text{H}$ - $^{13}\text{C}$  HSQCED spectra were recorded with the  $^1J_{\text{CH}}$  constant set to 145 Hz while the  $^1\text{H}$ - $^{13}\text{C}$  and  $^1\text{H}$ - $^{29}\text{Si}$  HMBC spectra were recorded with a  $^nJ_{\text{XH}}$  constant set to 8 Hz and 10 Hz, respectively. 1D  $^{19}\text{F}$  spectra were acquired with inverse-gated  $^1\text{H}$  decoupling. 1D  $^{31}\text{P}$  spectra were acquired with  $^1\text{H}$  decoupling during the relaxation delay and acquisition time and thus are non-quantitative. Exact mass spectra were recorded on a LTQ Orbitrap XL apparatus with ESI ionization. Enantiomeric excess (*ee*) were determined by chiral HPLC analysis using a Shimadzu LC-10ADVP HPLC equipped with a Shimadzu SPD-M10A/P diode array detector.

## 2. Chemicals

Unless otherwise indicated, reagents and substrates were purchased from commercial sources and used as received. Solvents not required to be dry were purchased as technical grade and used as received. Dry solvents were freshly collected from a dry solvent purification system prior to use. Inert atmosphere experiments were performed with standard Schlenk techniques with dried ( $P_2O_5$ ) nitrogen gas. Grignard reagents were purchased from Sigma-Aldrich (EtMgBr, MeMgBr, PhMgBr (3.0 M in Et<sub>2</sub>O), *i*ButMgBr, *i*PentMgBr, HexMgBr, cyclopentylMgBr (2.0 M in Et<sub>2</sub>O). All other Grignard reagents were prepared from the corresponding alkyl bromides and Mg activated with I<sub>2</sub> in Et<sub>2</sub>O: phenylethylMgBr (2.6 M in Et<sub>2</sub>O), pent-4-en-1-ylMgBr (1.7 M in Et<sub>2</sub>O) and (4-chlorobutyl)MgBr (1.3 M in Et<sub>2</sub>O). All Grignard reagents were titrated by NMR before use. Unless otherwise noted enamides substrates were prepared following the literature methods (*vide infra*). Chiral ligands (**L1-L4**) were purchased from Sigma Aldrich and Solvias. All reported compounds were characterized by <sup>1</sup>H and <sup>13</sup>C NMR and compared with literature data. All new compounds were fully characterized by <sup>1</sup>H and <sup>13</sup>C NMR and HRMS techniques.

## 3. Determination of absolute configuration

The absolute configuration was determined by comparison of the optical rotation for the compounds **2b** ( $[\alpha]_D^{20} = + 10.4$  (*c* 1.4, CHCl<sub>3</sub>), *S*-configuration) and the ester derived from **2m** ( $[\alpha]_D^{20} = + 16.1$  (*c* 1.43, CHCl<sub>3</sub>), *S*-configuration) with reported data (K. Biswas and S. Woodward, *Tetrahedron: Asymmetry*, **2008**, *19*, 1702;  $[\alpha]_D^{20} = - 5.6$  (*c* 1.5, CHCl<sub>3</sub>), *R*-configuration) and (C.-J. Hou, W.-L. Gou, X.-P. Hu, J. Deng and Z. Zheng. *Tetrahedron: Asymmetry*, **2011**, *22*, 195-199;  $[\alpha]_D^{20} = + 7.8$  (*c* 1.18, CHCl<sub>3</sub>), *S*-configuration), respectively. The absolute configurations of other compounds were assigned by analogy.

## 4. Optimization of reaction conditions for enantioselective conjugate addition to enamides

Optimisation studies were carried out with two enamide substrates **1a** and **1b**.

**Table S1.** Screening of chiral ligands, solvents, LA for copper 1,4-addition of EtMgBr to acyclic  $\alpha,\beta$ -unsaturated amide **1b**.

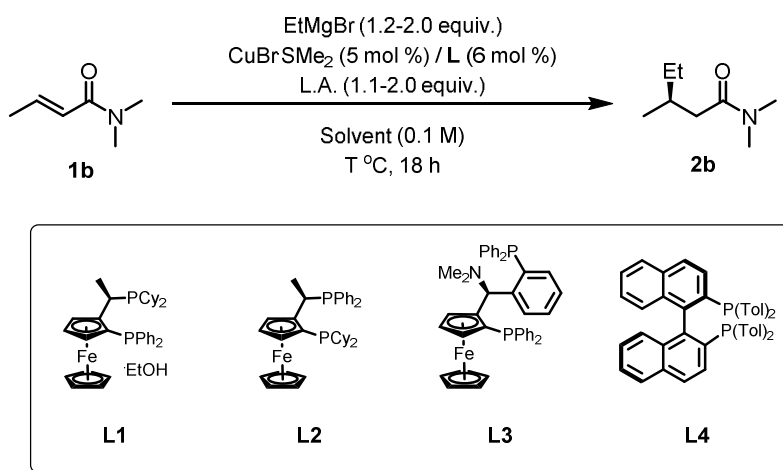

| Entry | L         | LA                                             | Solvent           | T[°C] | Yield [%] <sup>a</sup> | ee [%] <sup>b</sup> |
|-------|-----------|------------------------------------------------|-------------------|-------|------------------------|---------------------|
| 1     | <b>L2</b> | -                                              | Et <sub>2</sub> O | -78   | 9 <sup>c,d</sup>       | -                   |
| 2     | -         | BF <sub>3</sub> ·Et <sub>2</sub> O             | Et <sub>2</sub> O | -78   | 0 <sup>c,e</sup>       | -                   |
| 3     | <b>L2</b> | BF <sub>3</sub> ·Et <sub>2</sub> O             | Et <sub>2</sub> O | -78   | 45 <sup>e</sup>        | 33                  |
| 4     | <b>L2</b> | BF <sub>3</sub> ·Et <sub>2</sub> O             | MTBE              | -78   | 39 <sup>f</sup>        | 23                  |
| 5     | <b>L2</b> | BF <sub>3</sub> ·Et <sub>2</sub> O             | DCM               | -78   | 62 <sup>f</sup>        | 24                  |
| 6     | <b>L1</b> | BF <sub>3</sub> ·Et <sub>2</sub> O             | DCM               | -78   | 57 <sup>f</sup>        | 90                  |
| 7     | <b>L3</b> | BF <sub>3</sub> ·Et <sub>2</sub> O             | DCM               | -78   | 40 <sup>f</sup>        | 84                  |
| 8     | <b>L4</b> | BF <sub>3</sub> ·Et <sub>2</sub> O             | DCM               | -78   | 45 <sup>f</sup>        | 65                  |
| 9     | <b>L1</b> | TMSOTf                                         | DCM               | -78   | 60 <sup>g</sup>        | 94                  |
| 10    | <b>L1</b> | BF <sub>3</sub> ·Et <sub>2</sub> O /<br>TMSOTf | DCM               | -78   | 66 <sup>g</sup>        | 92                  |

|    |           |                                    |     |     |                   |    |
|----|-----------|------------------------------------|-----|-----|-------------------|----|
| 11 | <b>L1</b> | TMSCl                              | DCM | -78 | <7 <sup>c,h</sup> | -  |
| 12 | <b>L1</b> | BF <sub>3</sub> ·Et <sub>2</sub> O | DCM | -78 | 79 <sup>g</sup>   | 94 |
| 13 | <b>L1</b> | BF <sub>3</sub> ·Et <sub>2</sub> O | DCM | -60 | 57 <sup>g</sup>   | 92 |

Reaction conditions: 0.2 mmol of **1b** in 2 mL of solvent, CuBrSMe<sub>2</sub> (5 mol%), ligand **L1** (6 mol%), LA (1.1-2.0 equiv.), EtMgBr (3.0 M in Et<sub>2</sub>O, 1.1-2.0 equiv.), T (°C), 18 h. <sup>a</sup> Yield of isolated **2b**. <sup>b</sup> Enantiomeric excesses were determined by HPLC on a chiral stationary phase. <sup>c</sup>

This value is related to the conversion. <sup>d</sup> 1.5 equiv. of EtMgBr were used in this case. <sup>e</sup> 1.1 equiv. of BF<sub>3</sub>·Et<sub>2</sub>O and 1.2 equiv. of EtMgBr were used in this case. <sup>f</sup> 1.1 equiv. of BF<sub>3</sub>·Et<sub>2</sub>O and 2.0 equiv. of EtMgBr were used in this case. <sup>g</sup> 2.0 equiv. of LA and 2.0 equiv. of EtMgBr were used in this case. <sup>h</sup> 2.0 equiv. of TMSCl and 1.5 equiv. of EtMgBr were used in this case.

**Table S2.** Optimization data for the Cu- conjugate addition of EtMgBr and MeMgBr to enamide **1a**

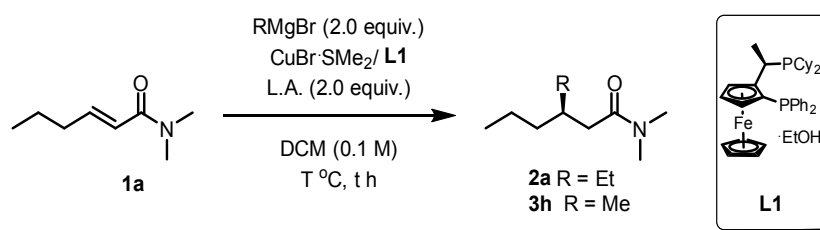

| Entry | <b>1a</b><br>[mmol] | <b>L1/Cu</b><br>[mol%] | <b>RMgBr</b> | <b>LA</b>                          | T[°C] | t[h] | Yield [%] <sup>a</sup> | ee [%] <sup>b</sup> |
|-------|---------------------|------------------------|--------------|------------------------------------|-------|------|------------------------|---------------------|
| 1     | 0.2                 | -                      | EtMgBr       | -                                  | -78   | 3    | 0 <sup>c</sup>         | -                   |
| 2     | 0.2                 | 5 <sup>d</sup>         | EtMgBr       | -                                  | -78   | 1    | 0 <sup>c</sup>         | -                   |
| 3     | 0.2                 | 5                      | EtMgBr       | -                                  | -78   | 1    | 0 <sup>c</sup>         | -                   |
| 4     | 0.2                 | -                      | EtMgBr       | -                                  | 0     | 5    | 97 <sup>c</sup>        | -                   |
| 5     | 0.2                 | 5 <sup>d</sup>         | EtMgBr       | -                                  | 0     | 5    | 42 <sup>c</sup>        | -                   |
| 6     | 0.2                 | 5                      | EtMgBr       | -                                  | 0     | 5    | 61                     | rac.                |
| 7     | 0.2                 | -                      | EtMgBr       | -                                  | -50   | 18   | 12 <sup>c</sup>        | -                   |
| 8     | 0.2                 | 5                      | EtMgBr       | -                                  | -50   | 18   | 20 <sup>c</sup>        | 5                   |
| 9     | 0.2                 | -                      | EtMgBr       | BF <sub>3</sub> ·Et <sub>2</sub> O | -78   | 1    | 0 <sup>c</sup>         | -                   |
| 10    | 0.2                 | -                      | EtMgBr       | TMSOTf                             | -78   | 1    | 50 <sup>c</sup>        | -                   |
| 11    | 0.2                 | 5                      | EtMgBr       | BF <sub>3</sub> ·Et <sub>2</sub> O | -78   | 18   | 73                     | 97                  |

|    |      |     |        |                                    |     |    |                  |    |
|----|------|-----|--------|------------------------------------|-----|----|------------------|----|
| 12 | 0.2  | 5   | EtMgBr | TMSOTf                             | -78 | 18 | 92               | 92 |
| 13 | 0.2  | 5   | MeMgBr | BF <sub>3</sub> ·Et <sub>2</sub> O | -78 | 18 | 50               | 99 |
| 14 | 0.2  | 5   | MeMgBr | TMSOTf                             | -78 | 18 | 77               | 99 |
| 15 | 0.2  | 5   | EtMgBr | BF <sub>3</sub> ·Et <sub>2</sub> O | -78 | 18 | 69 <sup>e</sup>  | 96 |
| 16 | 0.2  | 100 | EtMgBr | -                                  | -30 | 18 | 4 <sup>c,f</sup> | 64 |
| 17 | 0.2  | 5   | MeMgBr | TMSOTf                             | -50 | 18 | 93               | 99 |
| 18 | 0.2  | 5   | EtMgBr | TMSOTf                             | 25  | 18 | 79               | 76 |
| 19 | 0.2  | 10  | EtMgBr | TMSOTf                             | 0   | 2  | 92               | 93 |
| 20 | 0.5  | 1   | MeMgBr | TMSOTf                             | 0   | 2  | 80               | 95 |
| 21 | 0.2  | 5   | EtMgBr | BF <sub>3</sub> ·Et <sub>2</sub> O | -78 | 18 | 78 <sup>g</sup>  | 96 |
| 22 | 1.0  | 1   | EtMgBr | BF <sub>3</sub> ·Et <sub>2</sub> O | -78 | 18 | 78               | 98 |
| 23 | 71.0 | 5   | MeMgBr | TMSOTf                             | 0   | 2  | 93               | 96 |
| 24 | 1.0  | 5   | EtMgBr | BF <sub>3</sub> ·Et <sub>2</sub> O | -78 | 18 | 89               | 96 |

Reaction conditions: 0.2 mmol of **1a** in 2 mL of DCM, CuBrSMe<sub>2</sub> (5 mol%), ligand **L1** (6 mol%), LA (2.0 equiv.), RMgBr (3.0

M in Et<sub>2</sub>O, 2.0 equiv.), T (°C), t (h). <sup>a</sup> Yield of isolated **2a**. <sup>b</sup> Enantiomeric excesses were determined by HPLC on a chiral stationary phase. <sup>c</sup> This value is related to the conversion. <sup>d</sup> Without ligand **L1**. <sup>e</sup> CuBrSMe<sub>2</sub> (5 mol%) and ligand **L1** (6 mol%) in 2 mL of DCM for 20 min. BF<sub>3</sub>·Et<sub>2</sub>O (2.0 equiv.) was added at -78 °C. After 20 min., **1a** (0.2 mmol) was added at -78 °C. After 20 min., EtMgBr (3.0 M in Et<sub>2</sub>O, 2.0 equiv.) was added. <sup>f</sup> With stoichiometric amount of Cu(I)/**L1** complex. <sup>g</sup> With recovered Cu(I)/**L1** complex.

## 5. (E)/(Z)-Isomerization experiments

A set of experiments was carried out for addition of EtMgBr and MeMgBr to (*E*)-**1a** and (*Z*)-**1a** in the presence of either BF<sub>3</sub>·Et<sub>2</sub>O or TMSOTf at -78 °C (Table S3). The (*Z*)/(*E*) ratio of **1a** in the resulting crude mixture was determined by <sup>1</sup>H NMR. No isomerization product to the more stable (*E*)-**1a** was obtained using TMSOTf (entries 3, 9, 11, 13, 16 and 20) or with a little conversion up to 2.5% in the presence of BF<sub>3</sub>·Et<sub>2</sub>O (entries 2, 8, 10, 12, 14 and 18). CA products with opposite absolute configuration were obtained from (*E*)-**1a** and (*Z*)-**1a** using chiral catalyst of the same configuration.

**Table S3.** Cu- CA of EtMgBr and MeMgBr to (*E*)- or (*Z*)-**1a**.

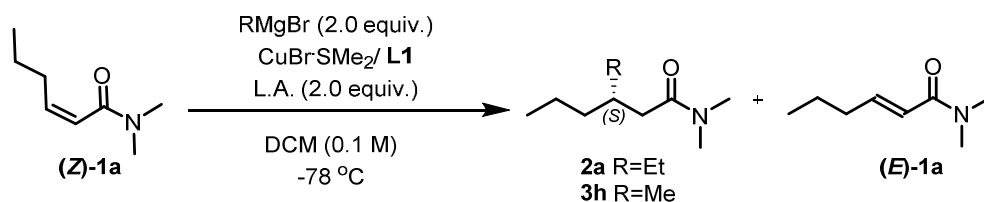

| Entry | <b>1a</b>             | <b>L1/Cu</b><br>[mol%] | <b>LA</b>                          | <b>RMgBr</b> | ( <i>Z</i> ):( <i>E</i> ): <b>2a</b> <sup>a</sup><br>( <i>Z</i> ):( <i>E</i> ): <b>3h</b> <sup>a</sup> | <i>ee</i> [%] <sup>b</sup> | Conf <sup>c</sup><br><b>2a</b> or <b>3h</b> |
|-------|-----------------------|------------------------|------------------------------------|--------------|--------------------------------------------------------------------------------------------------------|----------------------------|---------------------------------------------|
| 1     | <i>Z</i>              | 5                      | -                                  | -            | 100:0:-                                                                                                | -                          | -                                           |
| 2     | <i>Z</i>              | -                      | BF <sub>3</sub> ·Et <sub>2</sub> O | -            | 100:0:-                                                                                                | -                          | -                                           |
| 3     | <i>Z</i>              | -                      | TMSOTf                             | -            | 100:0:-                                                                                                | -                          | -                                           |
| 4     | <i>Z</i>              | -                      | -                                  | MeMgBr       | 100:0:0                                                                                                | -                          | -                                           |
| 5     | <i>Z</i>              | -                      | -                                  | EtMgBr       | 100:0:0                                                                                                | -                          | -                                           |
| 6     | <i>Z</i>              | 5                      | -                                  | MeMgBr       | 100:0:0                                                                                                | -                          | -                                           |
| 7     | <i>Z</i>              | 5                      | -                                  | EtMgBr       | 100:0:0                                                                                                | -                          | -                                           |
| 8     | <i>Z</i>              | -                      | BF <sub>3</sub> ·Et <sub>2</sub> O | MeMgBr       | 100:0:0                                                                                                | -                          | -                                           |
| 9     | <i>Z</i>              | -                      | TMSOTf                             | MeMgBr       | 100:0:0                                                                                                | -                          | -                                           |
| 10    | <i>Z</i>              | -                      | BF <sub>3</sub> ·Et <sub>2</sub> O | EtMgBr       | 100:0:0                                                                                                | -                          | -                                           |
| 11    | <i>Z</i>              | -                      | TMSOTf                             | EtMgBr       | 98:0:2                                                                                                 | -                          | -                                           |
| 12    | <i>Z</i>              | 5                      | BF <sub>3</sub> ·Et <sub>2</sub> O | -            | 97.5:2.5:-                                                                                             | -                          | -                                           |
| 13    | <i>Z</i>              | 5                      | TMSOTf                             | -            | 100:0:-                                                                                                | -                          | -                                           |
| 14    | <i>Z</i>              | 5                      | BF <sub>3</sub> ·Et <sub>2</sub> O | MeMgBr       | 75.8:1.6:22.6                                                                                          | 99                         | <b>(S)-3h</b>                               |
| 15    | <i>E</i> <sup>c</sup> | 5                      | BF <sub>3</sub> ·Et <sub>2</sub> O | MeMgBr       | -:35:65                                                                                                | 99                         | <b>(R)-3h</b>                               |
| 16    | <i>Z</i>              | 5                      | TMSOTf                             | MeMgBr       | 93:0:7                                                                                                 | 46                         | <b>(S)-3h</b>                               |
| 17    | <i>E</i> <sup>c</sup> | 5                      | TMSOTf                             | MeMgBr       | -:8:92                                                                                                 | 99                         | <b>(R)-3h</b>                               |
| 18    | <i>Z</i>              | 5                      | BF <sub>3</sub> ·Et <sub>2</sub> O | EtMgBr       | 37.4:1.6:61                                                                                            | 96                         | <b>(S)-2a</b>                               |
| 19    | <i>E</i> <sup>c</sup> | 5                      | BF <sub>3</sub> ·Et <sub>2</sub> O | EtMgBr       | -:6:94                                                                                                 | 97                         | <b>(R)-2a</b>                               |
| 20    | <i>Z</i>              | 5                      | TMSOTf                             | EtMgBr       | 70:0:30                                                                                                | 33                         | <b>(S)-2a</b>                               |
| 21    | <i>E</i> <sup>c</sup> | 5                      | TMSOTf                             | EtMgBr       | -:6:94                                                                                                 | 92                         | <b>(R)-2a</b>                               |

Reaction conditions: 0.16 mmol of (*Z*)-**1a** in 1.6 mL of DCM, CuBr·SMe<sub>2</sub> (5 mol%), ligand **L1** (6 mol%), LA (2.0 equiv.), RMgBr (3.0 M in Et<sub>2</sub>O, 2.0 equiv.), -78 °C. <sup>a</sup> The ratio between (*Z*)-**1a**:(*E*)-**1a**:**2a** or (*Z*)-**1a**:(*E*)-**1a**:**3a** was determined by <sup>1</sup>H-NMR. <sup>b</sup> Enantiomeric excesses were determined by HPLC on a chiral stationary phase. <sup>c</sup> 0.2 mmol of (*E*)-**1a** were used in this case.



**(Z)-N,N-Dimethylhex-2-enamide (1a)**

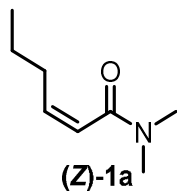

To a solution of *N,N*-dimethylacetamide (465  $\mu$ L, 5 mmol) in dry THF (15 mL) cooled to  $-78$   $^{\circ}$ C, a 1.0 M solution of LDA in THF (4.5 mmol, 4.5 mL) was slowly added and the mixture was stirred for 30 minutes at  $-78$   $^{\circ}$ C. Then, TMSCl (571  $\mu$ L, 4.5 mmol) was added and the mixture was stirred for 1 h at 0  $^{\circ}$ C and, afterwards, cooled down again to  $-78$   $^{\circ}$ C. A 1.0 M solution of LDA in THF (4.5 mmol, 4.5 mL) was slowly added and the reaction mixture was stirred for 30 minutes at  $-78$   $^{\circ}$ C. Finally, butyraldehyde (405  $\mu$ L, 4.5 mmol) was added and the mixture was stirred overnight at  $-78$   $^{\circ}$ C. The reaction was quenched by addition of MeOH (1.0 mL) and 1.0 M HCl aqueous solution (10 mL), stirred at room temperature for 45 minutes and extracted with Et<sub>2</sub>O (15 mL  $\times$  3). The combined organic layers were dried over MgSO<sub>4</sub> and concentrated under reduced pressure. The crude product was purified by column chromatography on silica gel (SiO<sub>2</sub>, pentane:Et<sub>2</sub>O 1:1) to afford product **1a** as a colorless oil [39% yield].

<sup>1</sup>H NMR (CDCl<sub>3</sub>, 400 MHz):  $\delta$  5.95 (dt,  $J$  = 11.7, 1.3 Hz, 1H, CH=CH), 5.89 (dt,  $J$  = 11.7, 7.3 Hz, 1H, CH=CH), 3.00 (s, 6H, N(CH<sub>3</sub>)<sub>2</sub>), 2.31 (dq,  $J$  = 7.3, 1.3 Hz, 2H, CH<sub>2</sub>CH=CH), 1.44 (sext (tq),  $J$  = 7.3 Hz, 2H, CH<sub>2</sub>CH<sub>2</sub>CH<sub>3</sub>), 0.92 (t,  $J$  = 7.3 Hz, 3H, CH<sub>2</sub>CH<sub>3</sub>).

<sup>13</sup>C NMR (CDCl<sub>3</sub>, 100 MHz):  $\delta$  168.0, 141.0, 122.0, 37.6, 35.1, 31.3, 22.3, 13.8.

**Chiral HPLCs of the products from (Z)/(E) isomerization experiments of (Z)-1a**

**With (Z)-1a, catalyst, LA and MeMgBr:**

HPLC: Chiracel-OBH, *n*-heptane/*i*-PrOH 90:10, 0.5 mL/min, 40 °C, detection at 206 nm. Retention time (min): 9.0 (major) and 10.1 (minor).

a) With (*Z*)-**1a**, **L1-CuBr**,  $BF_3 \cdot Et_2O$  and  $MeMgBr$ : (*S*)-**3h** [99% ee].

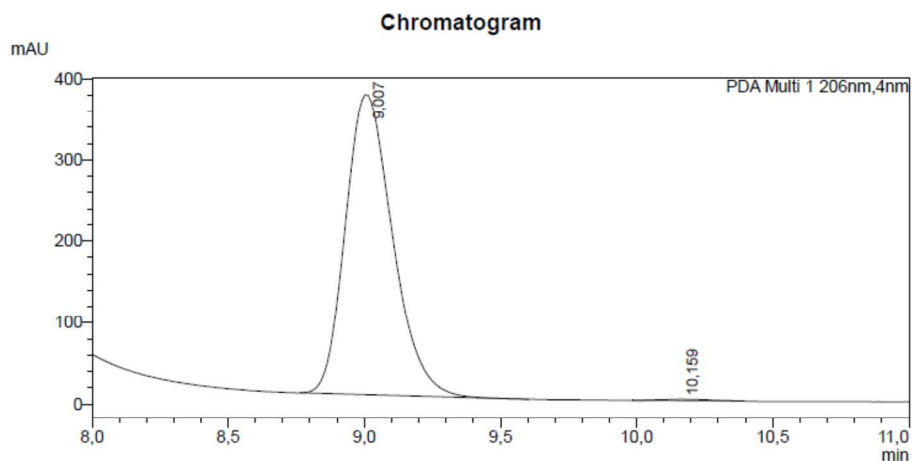

**Peak Table**

| PDA Ch1 206nm |           |         |        |        |
|---------------|-----------|---------|--------|--------|
| Peak#         | Ret. Time | Area    | Height | Conc.  |
| 1             | 9,007     | 4444014 | 368946 | 99,599 |
| 2             | 10,159    | 17895   | 1603   | 0,401  |
| Total         |           | 4461909 | 370549 |        |

b) With (*Z*)-**1a**, **L1-CuBr**,  $TMSOTf$  and  $MeMgBr$ : (*S*)-**3h** [46% ee].

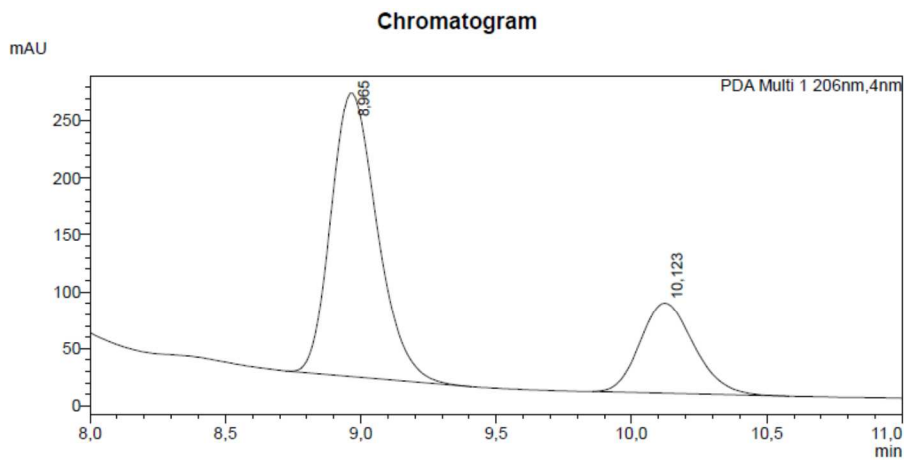

**Peak Table**

| PDA Ch1 206nm |           |         |        |        |
|---------------|-----------|---------|--------|--------|
| Peak#         | Ret. Time | Area    | Height | Conc.  |
| 1             | 8,965     | 2962641 | 248982 | 73,087 |
| 2             | 10,123    | 1090954 | 79054  | 26,913 |
| Total         |           | 4053595 | 328036 |        |

c) With (*E*)-**1a**, **L1-CuBr**,  $BF_3 \cdot Et_2O$  and  $MeMgBr$ : (*R*)-**3h** [99% *ee*].

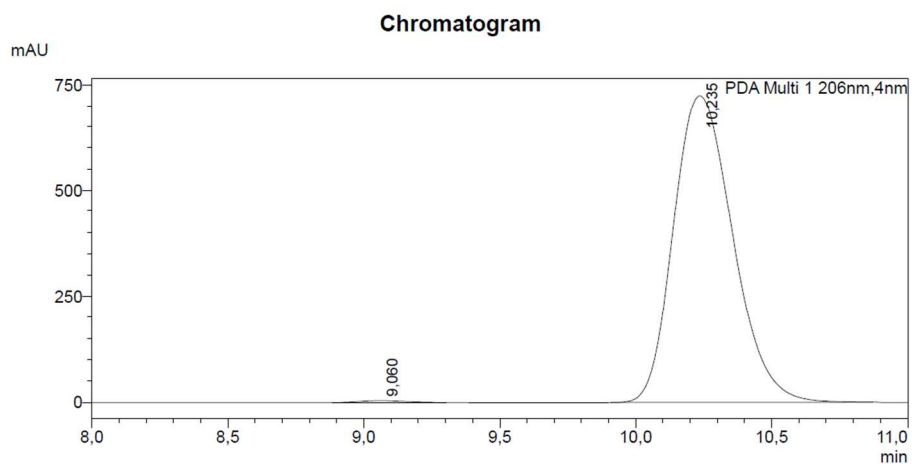

**Peak Table**

| PDA Ch1 206nm |           |          |        |        |
|---------------|-----------|----------|--------|--------|
| Peak#         | Ret. Time | Area     | Height | Conc.  |
| 1             | 9,060     | 47641    | 4345   | 0,432  |
| 2             | 10,235    | 10974951 | 724084 | 99,568 |
| Total         |           | 11022592 | 728429 |        |

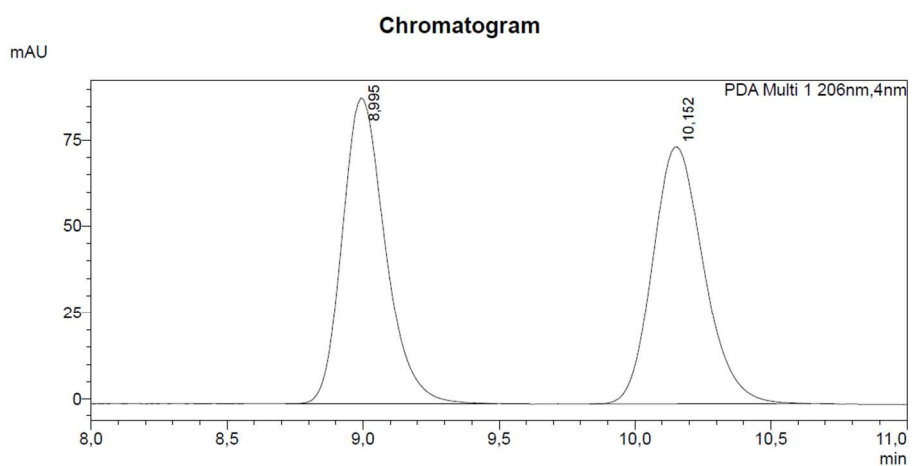

**Peak Table**

| PDA Ch1 206nm |           |         |        |        |
|---------------|-----------|---------|--------|--------|
| Peak#         | Ret. Time | Area    | Height | Conc.  |
| 1             | 8,995     | 972588  | 88794  | 49,971 |
| 2             | 10,152    | 973703  | 74508  | 50,029 |
| Total         |           | 1946291 | 163302 |        |

**With (*Z*)-**1a**, catalyst, **LA** and  $EtMgBr$ :**

HPLC: Chiracel-OBH, *n*-heptane/*i*-PrOH 95:5, 0.5 mL/min, 40 °C, detection at 210 nm. Retention time (min): 10.5 (major) and 11.5 (minor).

a) With (Z)-**1a**, **L1-CuBr**,  $BF_3 \cdot Et_2O$  and  $EtMgBr$ : (S)-**2a** [96% ee].

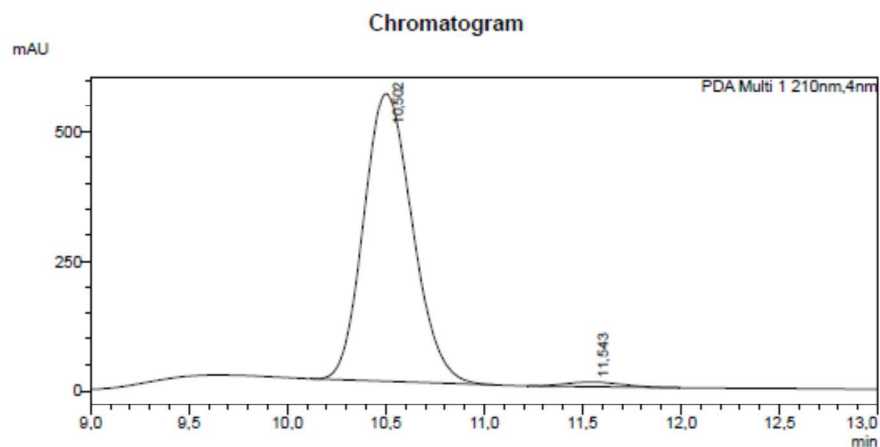

**Peak Table**

| PDA Ch1 210nm |           |         |        |        |
|---------------|-----------|---------|--------|--------|
| Peak#         | Ret. Time | Area    | Height | Conc.  |
| 1             | 10.502    | 9561513 | 555580 | 98,228 |
| 2             | 11.543    | 172532  | 8964   | 1,772  |
| Total         |           | 9734045 | 564544 |        |

b) With (Z)-**1a**, catalyst,  $TMSOTf$  and  $EtMgBr$ : (S)-**2a** [33% ee].

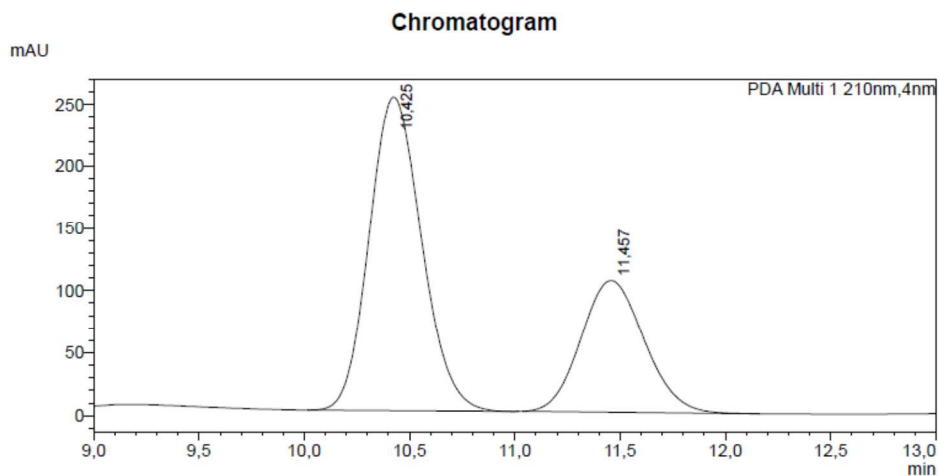

**Peak Table**

| PDA Ch1 210nm |           |         |        |        |
|---------------|-----------|---------|--------|--------|
| Peak#         | Ret. Time | Area    | Height | Conc.  |
| 1             | 10.425    | 4358835 | 252026 | 66,473 |
| 2             | 11.457    | 2198443 | 105316 | 33,527 |
| Total         |           | 6557277 | 357342 |        |

c) With (E)-**1a**, **L1**-CuBr, BF<sub>3</sub>·Et<sub>2</sub>O and EtMgBr: (R)-**2a** [97% ee].

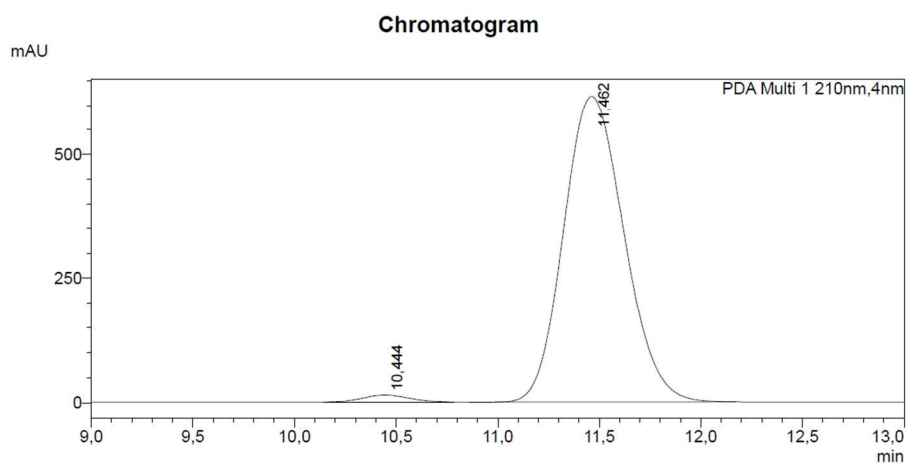

**Peak Table**

| PDA Ch1 210nm |           |          |        |        |
|---------------|-----------|----------|--------|--------|
| Peak#         | Ret. Time | Area     | Height | Conc.  |
| 1             | 10,444    | 217265   | 13911  | 1,680  |
| 2             | 11,462    | 12717057 | 616670 | 98,320 |
| Total         |           | 12934322 | 630581 |        |

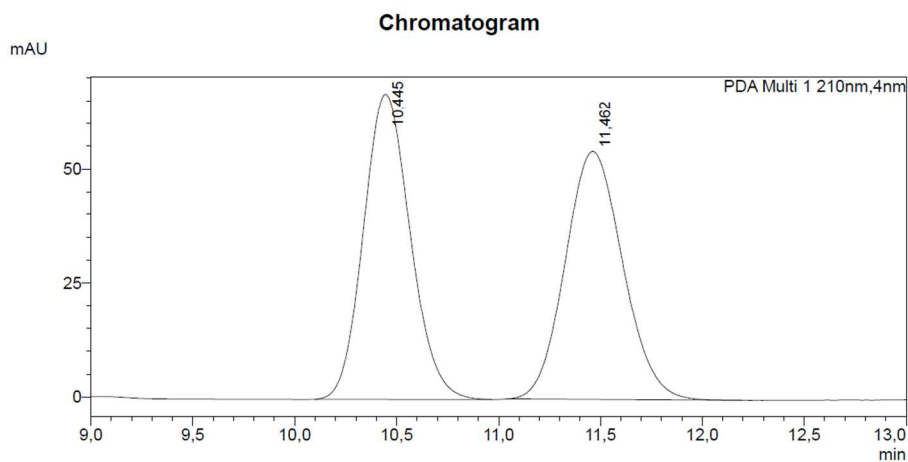

**Peak Table**

| PDA Ch1 210nm |           |         |        |        |
|---------------|-----------|---------|--------|--------|
| Peak#         | Ret. Time | Area    | Height | Conc.  |
| 1             | 10,445    | 1068987 | 66946  | 50,040 |
| 2             | 11,462    | 1067275 | 54327  | 49,960 |
| Total         |           | 2136262 | 121273 |        |

## 6. NMR spectroscopy based mechanistic studies

### *Transmetallated species 8*

Transmetallated species **8**, which initiates the catalytic cycle (see Figure 3, main manuscript), were prepared by addition of MeMgBr to **L1**-CuBr complex and analyzed by  $^1\text{H}$  and  $^{31}\text{P}$  NMR spectroscopy. A 3 M MeMgBr solution in Et<sub>2</sub>O (20  $\mu\text{L}$ , 0.06 mmol) was added to a solution of **L1**-CuBr complex (11 mg, 0.015 mmol) in CD<sub>2</sub>Cl<sub>2</sub> (0.6 mL) in a dry NMR tube at  $-78\text{ }^\circ\text{C}$  and the resulting mixture was immediately measured by NMR spectroscopy at  $-80\text{ }^\circ\text{C}$ . Two different transmetallated species (**A** and **B**, Figures S1 and S2) were detected. Both species present methyl moieties coupled with both phosphines with the same pattern in the  $^1\text{H}$ - $^{31}\text{P}$  HMBC spectrum (Figure S3). For both species the integration indicates that only 1 methyl group is bound to the copper (based on the 1:1 ratio measured by comparison of the Me signal with signals from the ferrocene). For these reasons both the species are assumed to be the two possible diastereoisomers of the tetrahedral alkylcuprate **10**<sup>1</sup> (species **B**: -0.28 ppm, dd, CuMe in  $^1\text{H}$  NMR; 14.8 (d,  $J=155.5\text{ Hz}$ ), -18.0 (d,  $J=155.5\text{ Hz}$ ) in  $^{31}\text{P}$  NMR and species **A**: -0.37 ppm, dd, CuMe in  $^1\text{H}$  NMR; 7.5 (d,  $J=144.3\text{ Hz}$ ), -26.4 (d,  $J=144.3\text{ Hz}$ ) in  $^{31}\text{P}$  NMR).

---

<sup>1</sup> The transmetallated species **8** was also formed in our previous work (see ref. 22 in the main manuscript). At that time our understanding was that species **A** and **B** are structurally different. However, based on the additional data in this work we have redefined the structure of species **8** and propose that both species **A** and **B** are diastereoisomers of the transmetallated species **8**. Their catalytic activity is identical as well.

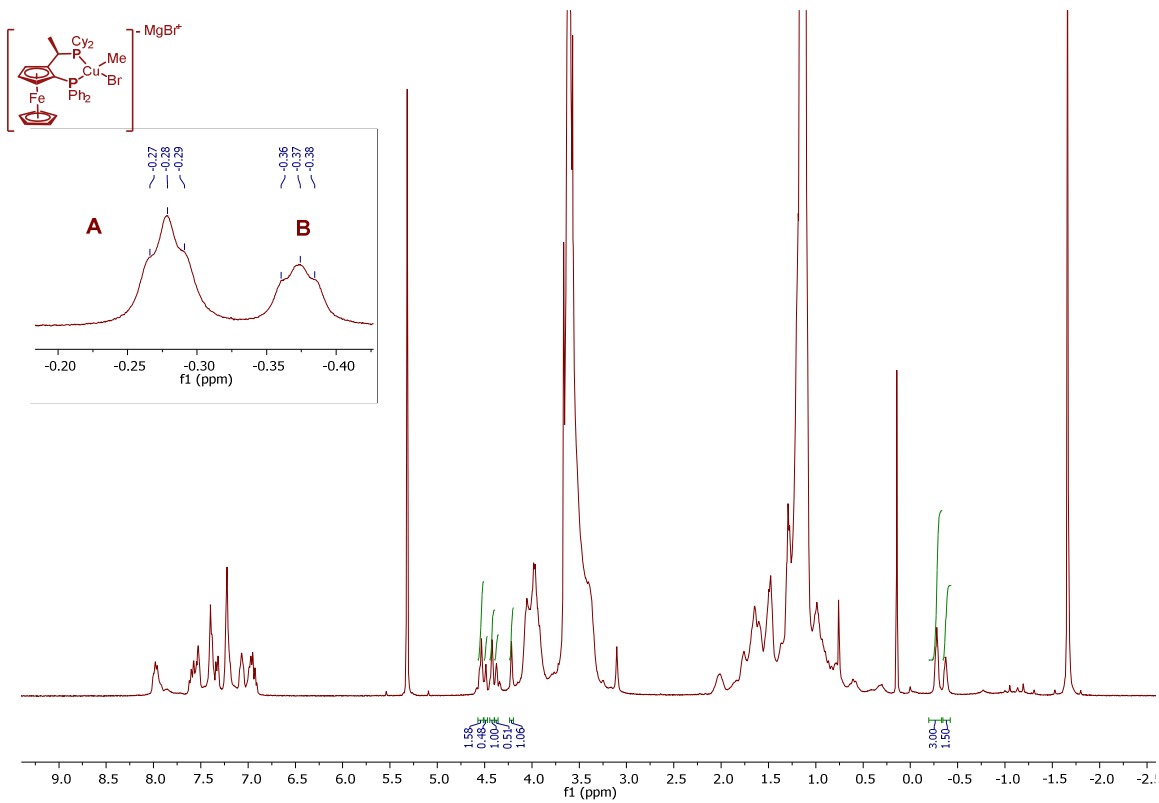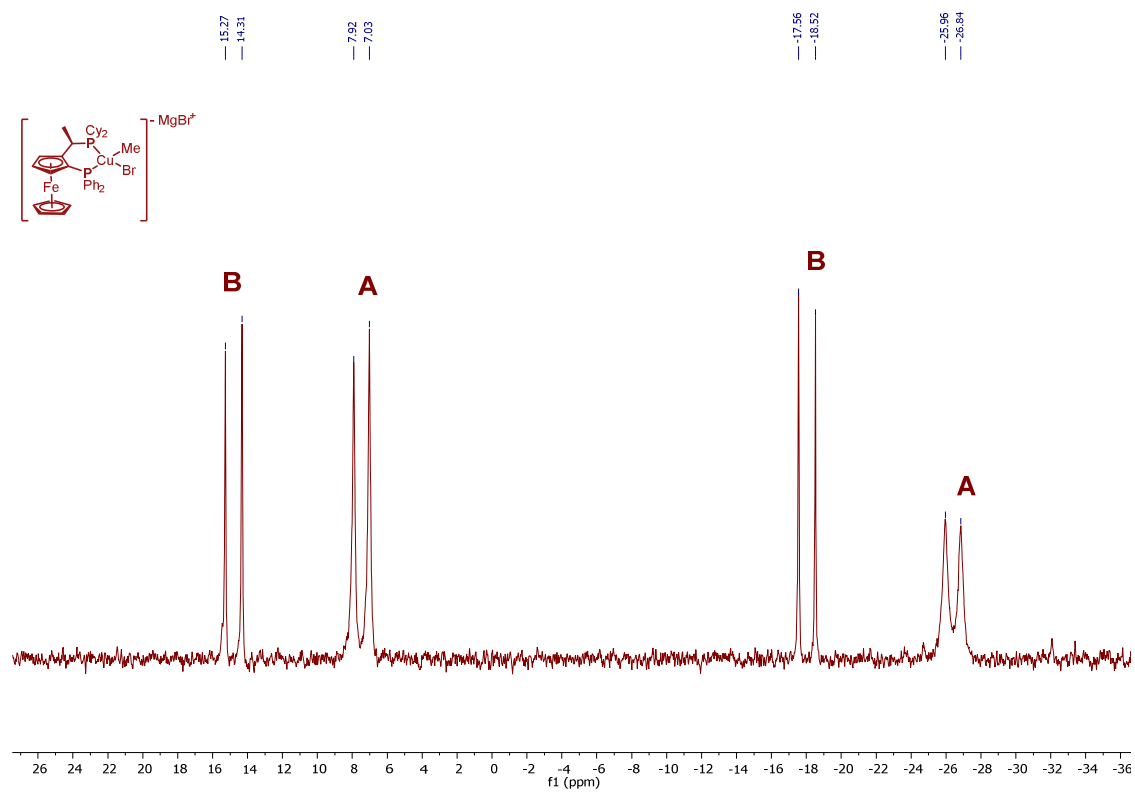

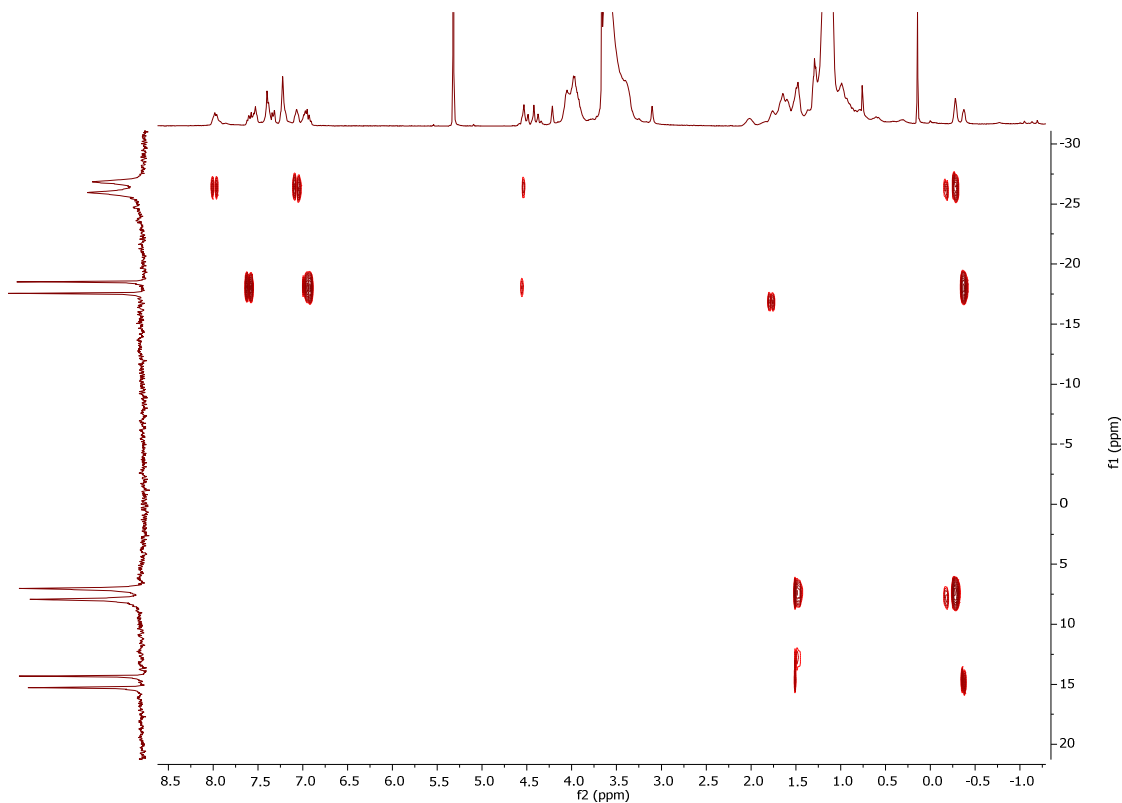

**Figure S3:**  $^1\text{H}$ - $^{31}\text{P}$  HMBC spectrum of the transmetallated species **8**. Similar pattern of coupling with the phosphines is observed for both species.

### *Stability of L1-CuBr and transmetallated species 8 towards Lewis acids*

With the aim to investigate the interactions between Lewis acids, **L1-CuBr** and transmetalated species **8** a set of experiments was carried out. **L1-CuBr** complex (5.9 mg, 0.08 mmol) was dissolved in  $\text{CD}_2\text{Cl}_2$  (0.6 mL) in a dry NMR tube under a  $\text{N}_2$  atmosphere and cooled down to  $-78\text{ }^\circ\text{C}$ . TMSOTf (15  $\mu\text{L}$ , 0.08 mmol) or  $\text{BF}_3\cdot\text{Et}_2\text{O}$  (10  $\mu\text{L}$ , 0.08 mmol) was added to the complex and the resulting mixture was measured by  $^1\text{H}$  and  $^{31}\text{P}$  NMR spectroscopy at  $-60\text{ }^\circ\text{C}$ . **L1-CuBr** complex (doublets, see top panels in Fig. S4) disappeared in both cases and unidentified phosphine species were formed: (singlets at 27.1 and 4.4 ppm; with TMSOTf left column, panel (c) of Fig. S4), and singlets at 31.9, 0.5 and -0.3 ppm; with  $\text{BF}_3\cdot\text{Et}_2\text{O}$  (right column, panel (d) of Fig. S4) spectrum **D**, figure S4). Observing phosphorus signals as singlets instead of



the initial doublets indicates detachment of, at least, one of the phosphine moieties of the **L1**-CuBr complex. Formation of new **L1**-CuBr complex with monodentate instead of bidentate coordination cannot be excluded either. After cooling down again to  $-78\text{ }^{\circ}\text{C}$ , a 3 M MeMgBr solution in Et<sub>2</sub>O (67  $\mu\text{L}$ , 0.2 mmol) was added and the mixture was measured by <sup>1</sup>H and <sup>31</sup>P NMR spectra NMR spectroscopy at  $-60\text{ }^{\circ}\text{C}$ . Importantly the transmetallated **L1**-CuBr species **8** was observed in both cases, , although in the case of TMSOTf only isomer **A** (left column, panel (e) of Fig. S4) and in the case of BF<sub>3</sub>·Et<sub>2</sub>O only isomer **B** among other signals (right column, panel (f) of Fig. S4).

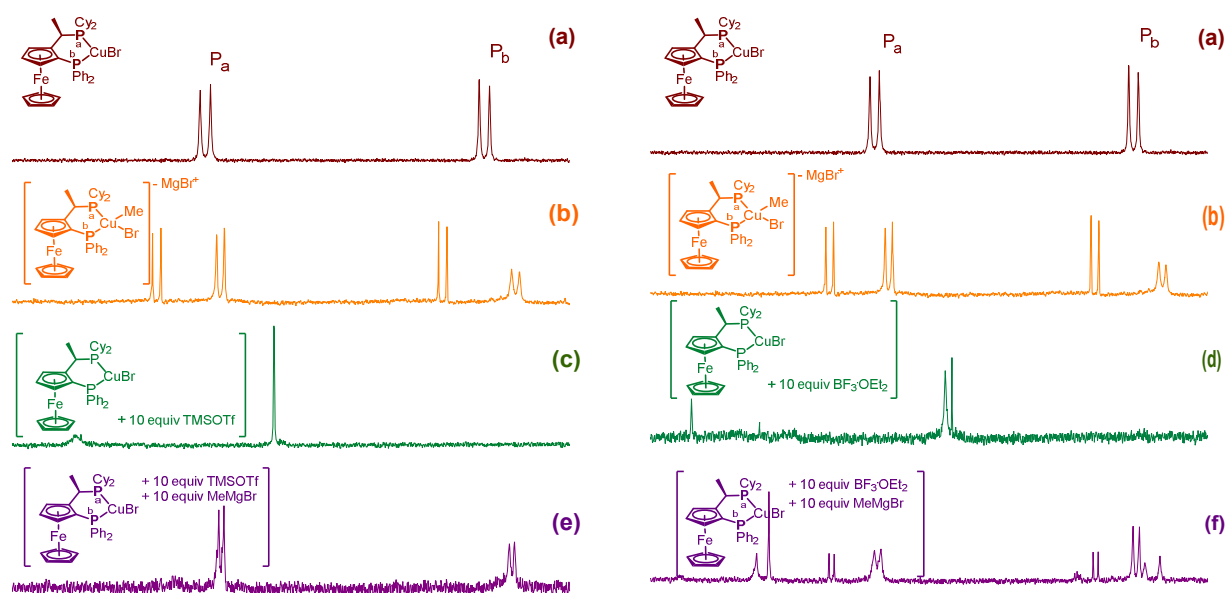

**Figure S4:** <sup>31</sup>P NMR spectra of combinations of **L1**-CuBr, MeMgBr and LA. Left column: from top to bottom the panels show the spectra of (a) the **L1**-CuBr complex, (b) the transmetallated species **8** (with **A** and **B** diastereoisomers), (c) **L1**-CuBr after adding 10 equiv. of TMSOTf, (e) the result of adding 10 equiv. of MeMgBr to (c) leading to the formation of species **A**. Right column: same as left column, but using BF<sub>3</sub>·Et<sub>2</sub>O instead of TMSOTf. (a) the **L1**-CuBr complex, (b) the transmetallated species **8** (with **A** and **B** diastereoisomers), (d) **L1**-CuBr after adding 10 equiv. of BF<sub>3</sub>·Et<sub>2</sub>O, (f) the result of adding 10 equiv. of MeMgBr to (d) leading to the formation of species **A** and **L1**-CuBr together with decomposed complex peaks from (d).

Similarly, the addition of TMSOTf or BF<sub>3</sub>·Et<sub>2</sub>O to the transmetallated species **8** (panels (b) in Fig. S4) does not change the structure of the complex and the same NMR spectra were obtained (not depicted).

## Lewis acid-enamide binding

In order to determine the activation mode of enamide **1b** in the presence of a Lewis acid, a set of experiments was carried out. Complexes of enamide/TMSOTf, enamide/BF<sub>3</sub>·Et<sub>2</sub>O and enamide/MeMgBr were prepared separately and analysed by NMR spectroscopy.

### *TMS-amide complex*

TMSOTf (16 μL, 0.088 mmol) was added to a solution of enamide **1b** (10 mg, 0.088 mmol) in CD<sub>2</sub>Cl<sub>2</sub> (0.6 mL) in a dry NMR tube at -78 °C under N<sub>2</sub> atmosphere, leading to instantaneous formation of a new species which was immediately measured by NMR spectroscopy at -80 °C. Two enamide complexes were observed and characterized as TMS-enamide complex (assigned in Figure S5) and protonated enamide.<sup>2</sup> The formation of an iminium-type complex, placing the silyl moiety on the oxygen atom, was suggested by the deshielded NMe<sub>2</sub> groups in the new iminium moiety (up to 0.5 ppm downfield) and confirmed by a <sup>1</sup>H-<sup>1</sup>H ROESY experiment (Figure S6) NMR spectroscopy also confirmed *s-trans* conformation. Full characterization was carried out by <sup>1</sup>H-<sup>13</sup>C-HSQCED (Figure S7), <sup>1</sup>H-<sup>13</sup>C-HMBC (Figure S8) and <sup>1</sup>H-<sup>29</sup>Si-HMBC (figure S9).

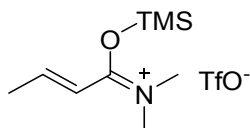

<sup>1</sup>H NMR (CD<sub>2</sub>Cl<sub>2</sub>, 400 MHz): δ 6.81 (dq, *J* = 15.5, 6.9 Hz, 1H), 6.41 (dd, *J* = 15.5, 1.5 Hz, 1H), 3.37 (s, 3H), 3.25 (s, 3H), 2.05-2.00 (m, 3H), 0.36 (s, 9H)

<sup>13</sup>C NMR (CD<sub>2</sub>Cl<sub>2</sub>, 100 MHz): δ 167.2, 152.5, 117.7, 40.4, 38.8, 19.4, 0.2.

<sup>29</sup>Si NMR (CD<sub>2</sub>Cl<sub>2</sub>, 79.5 MHz): δ 38.4.

<sup>19</sup>F NMR (CD<sub>2</sub>Cl<sub>2</sub>, 376.6 MHz): δ -79.17.

<sup>2</sup> Water derived from the enamide substrates partially hydrolyzes TMSOTf resulting in formation of TfOH, which can protonate the enamide



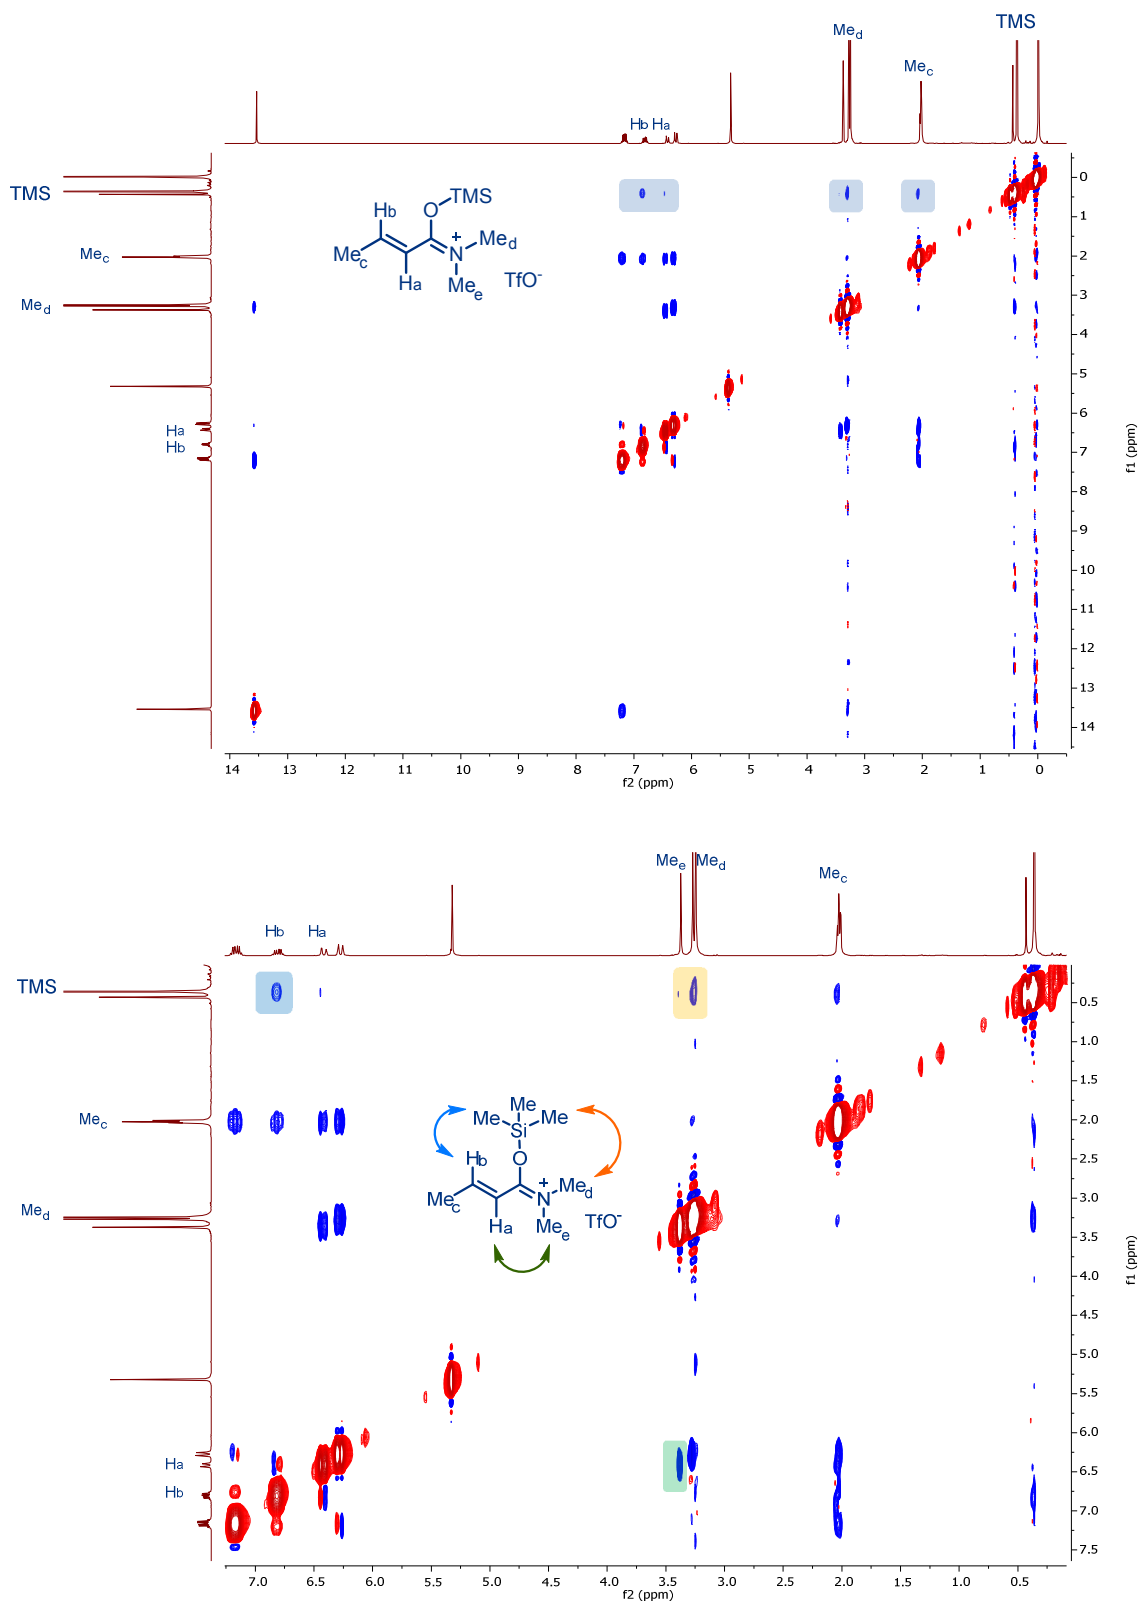

**Figure S6:**  $^1\text{H}$ - $^1\text{H}$ -ROESY spectrum of the equimolar mixture of enamide **1b** and TMSOTf and expansion. Cross-peaks between the TMS moiety and both  $\text{H}_\text{b}$  (blue) and one of the NMe groups (orange) and between the other NMe group and  $\text{H}_\text{a}$  (green) confirmed the O-silylation and the *s-trans* conformation.

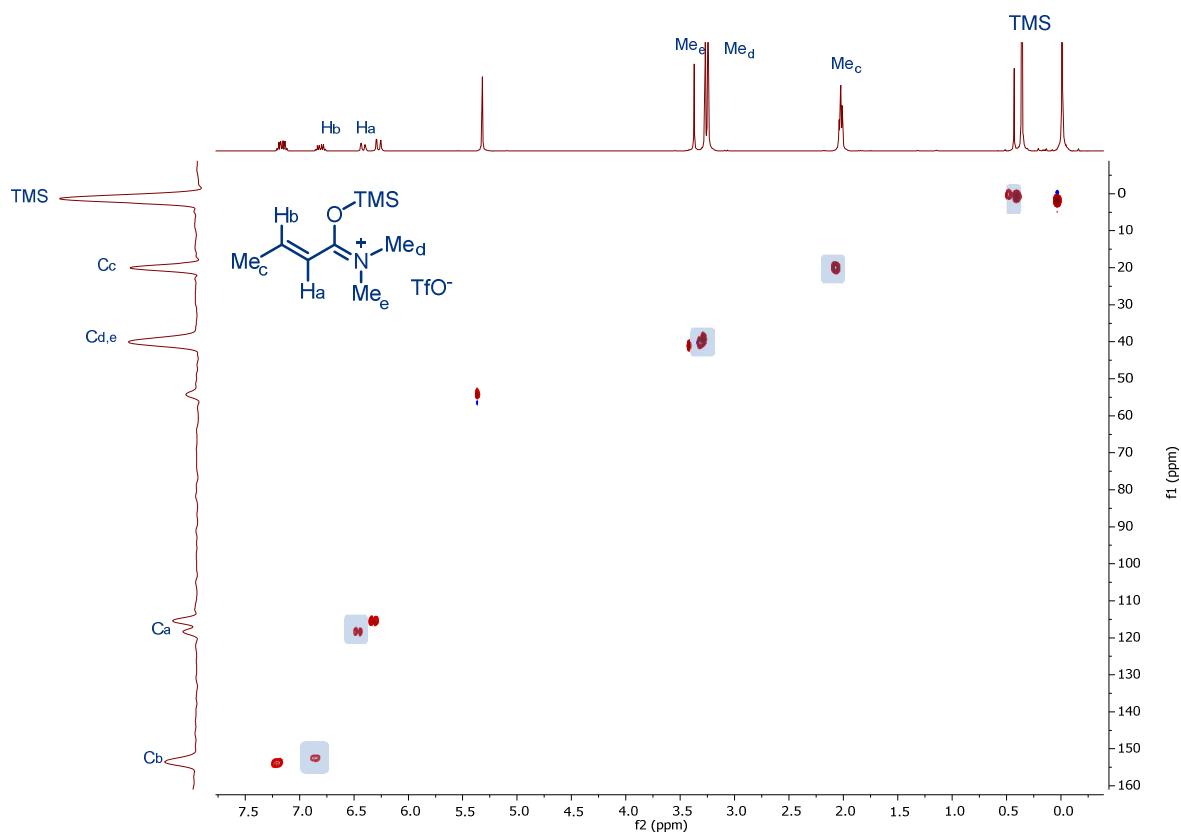

**Figure S7:**  $^1\text{H}$ - $^{13}\text{C}$ -HSQCED spectrum of the equimolar mixture of enamide **1b** and TMSOTf. TMS-enamide complex cross-peaks are highlighted.

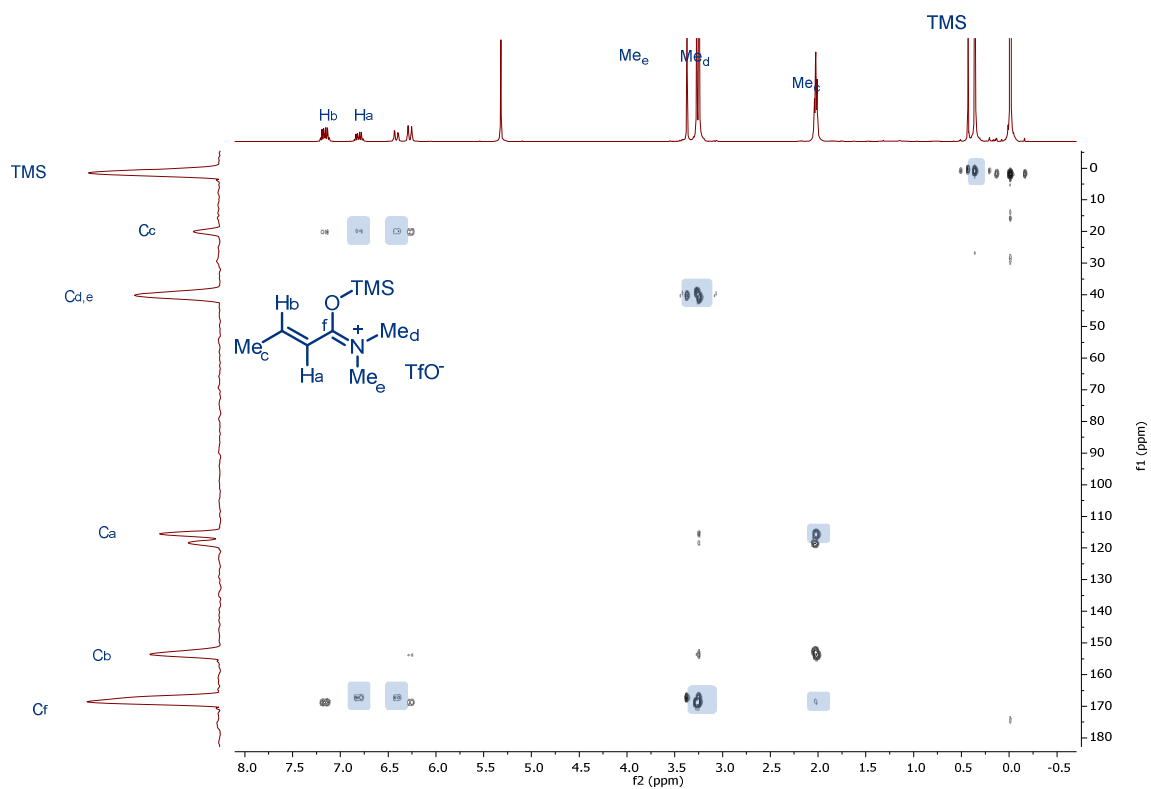

**Figure S8:**  $^1\text{H}$ - $^{13}\text{C}$ -HMBC spectrum of the equimolar mixture of enamide **1b** and TMSOTf.

TMS-enamide complex cross-peaks are highlighted.

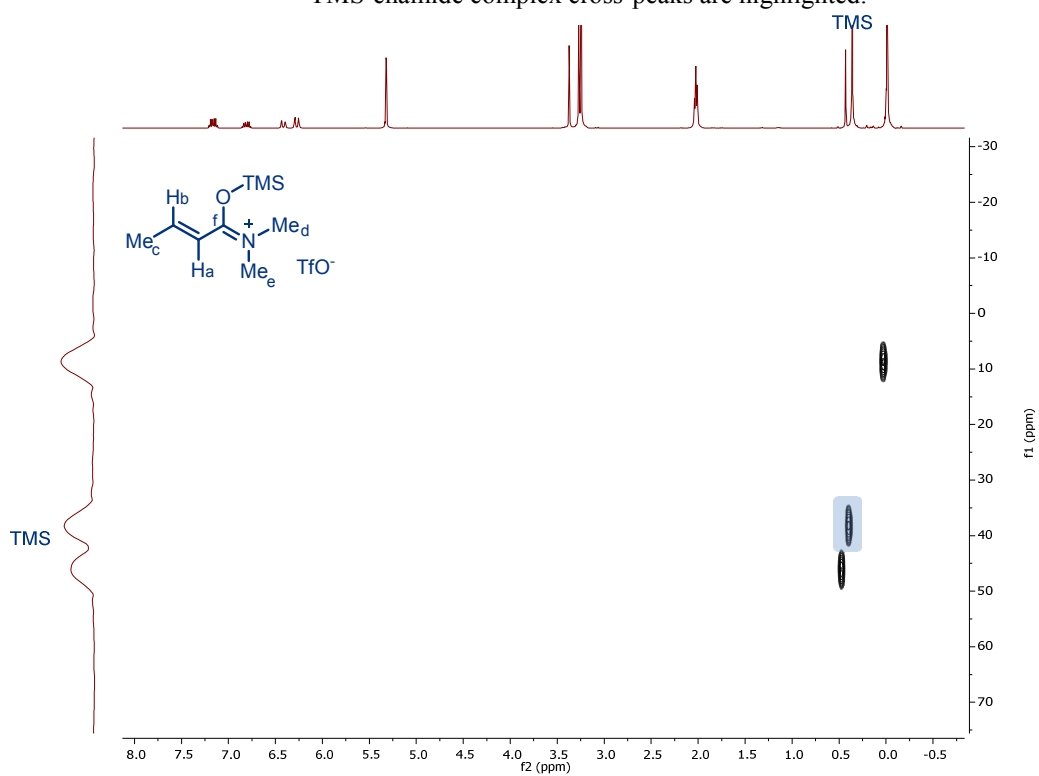

**Figure S9:**  $^1\text{H}$ - $^{29}\text{Si}$ -HMBC spectrum of the equimolar mixture of enamide **1b** and TMSOTf. TMS-enamide complex cross-peaks are highlighted.

### *BF<sub>3</sub>-amide complex*

BF<sub>3</sub>·Et<sub>2</sub>O ( 10 μL, 0.08 mmol) was added to a solution of amide **1b** ( 9 mg, 0.08 mmol) in CD<sub>2</sub>Cl<sub>2</sub> (0.6 mL) in a dry NMR tube at -78 °C. Instantaneous formation of a new species at -80 °C was measured by NMR spectroscopy. In analogy with the experiment above two new enamide species were detected using <sup>1</sup>H NMR (Fig. S10).<sup>3</sup> Formation of an enamide-BF<sub>3</sub> complex was confirmed by <sup>1</sup>H-<sup>19</sup>F-HOESY spectra (Figure S11) and fully characterized by <sup>11</sup>B-NMR (Figure S12), <sup>19</sup>F-NMR (Figure S13), <sup>1</sup>H-<sup>13</sup>C-HSQCED (Figure S14), and <sup>1</sup>H-<sup>13</sup>C-HMBC (Figure S15).

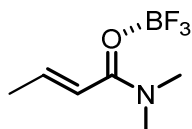

<sup>1</sup>H NMR (CD<sub>2</sub>Cl<sub>2</sub>, 400 MHz): δ 13.55 (s, 1H), 6.78 (dq, *J* = 13.6, 6.8 Hz, 1H), 6.23 (d, *J* = 15.9, 1H), 3.30 (s, 3H), 3.22 (s, 3H), 2.00 (d, *J* = 6.8 Hz, 3H) (Major species).

<sup>13</sup>C NMR (CD<sub>2</sub>Cl<sub>2</sub>, 100 MHz): δ 169.7, 149.0, 117.6, 41.0, 38.7, 19.9, 14.6 (Major species).

<sup>11</sup>B NMR (CD<sub>2</sub>Cl<sub>2</sub>, 100 MHz): δ -0.26, -0.74, -1.22, -1.28.

<sup>19</sup>F NMR (CD<sub>2</sub>Cl<sub>2</sub>, 100 MHz): δ -146.82 (<sup>19</sup>F-<sup>10</sup>B), -146.88 (<sup>19</sup>F-<sup>11</sup>B).

---

<sup>3</sup> A few other acidic proton peaks were detected as well due to the water present in the substrate.

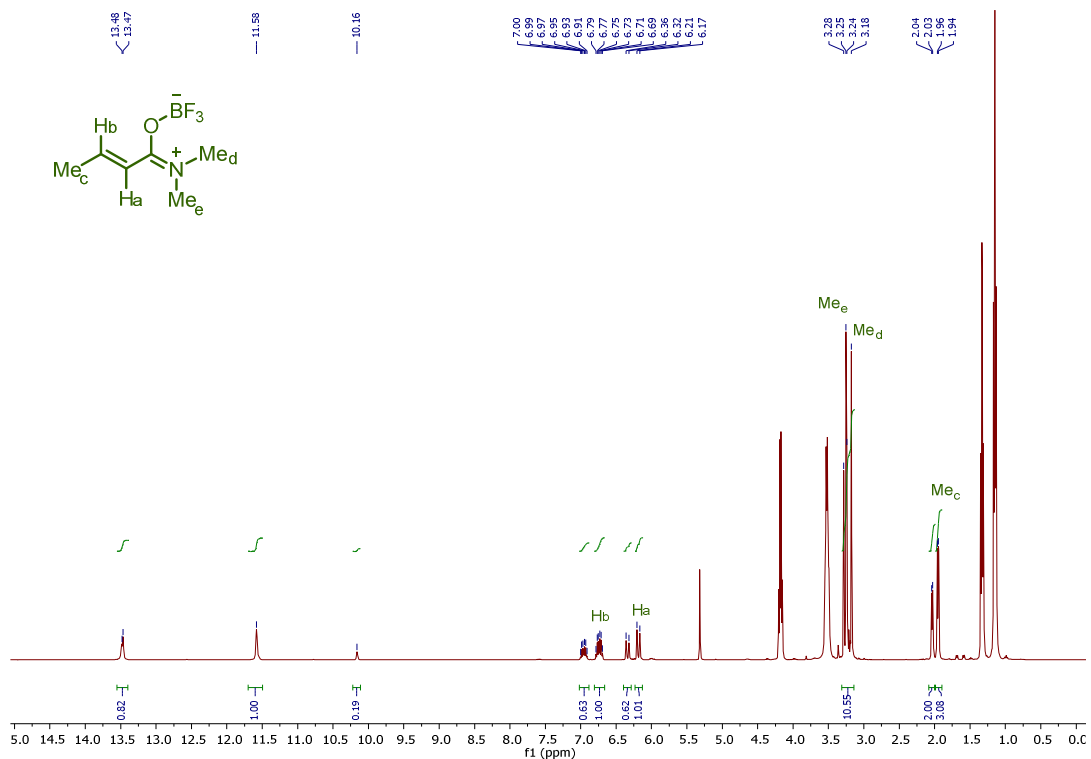

**Figure S10:** <sup>1</sup>H NMR spectrum of the equimolar mixture of enamide **1b** and BF<sub>3</sub>·Et<sub>2</sub>O.

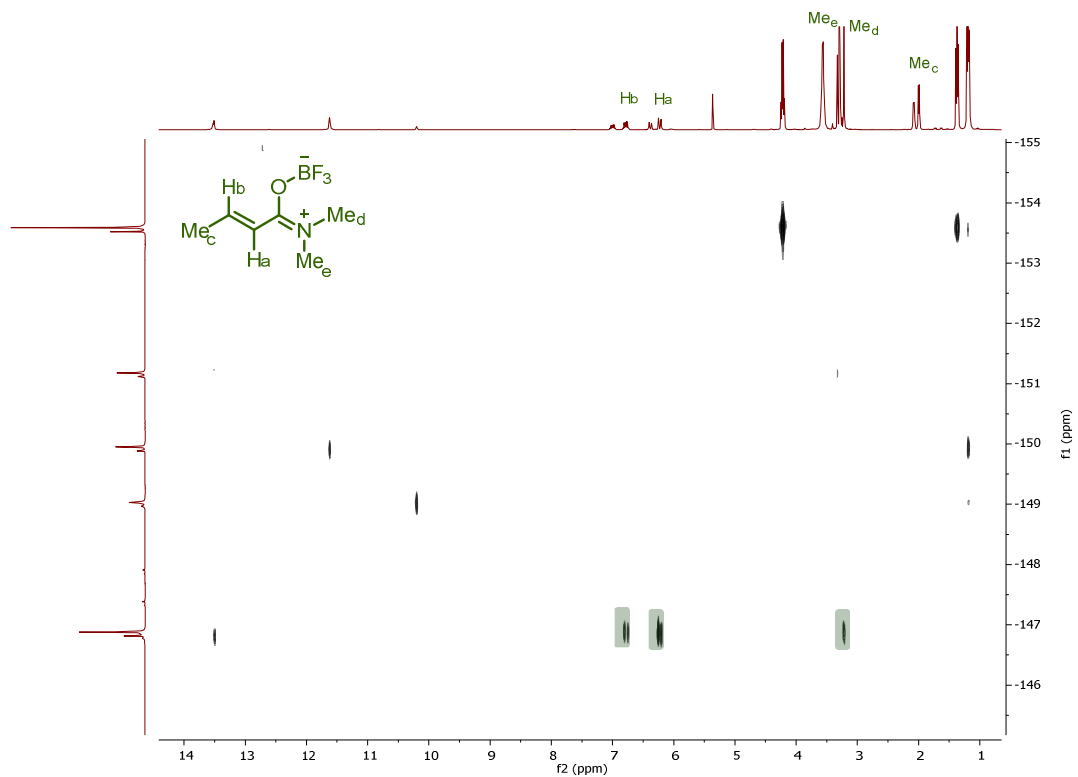

**Figure S11:** <sup>1</sup>H-<sup>19</sup>F-HOESY spectrum of the equimolar mixture of enamide **1b** and BF<sub>3</sub>·Et<sub>2</sub>O. Cross-peak with the enamide moieties (green) and <sup>19</sup>F signal at -147 ppm confirmed the formation of a complex. BF<sub>3</sub>-enamide complex cross-peaks are highlighted.



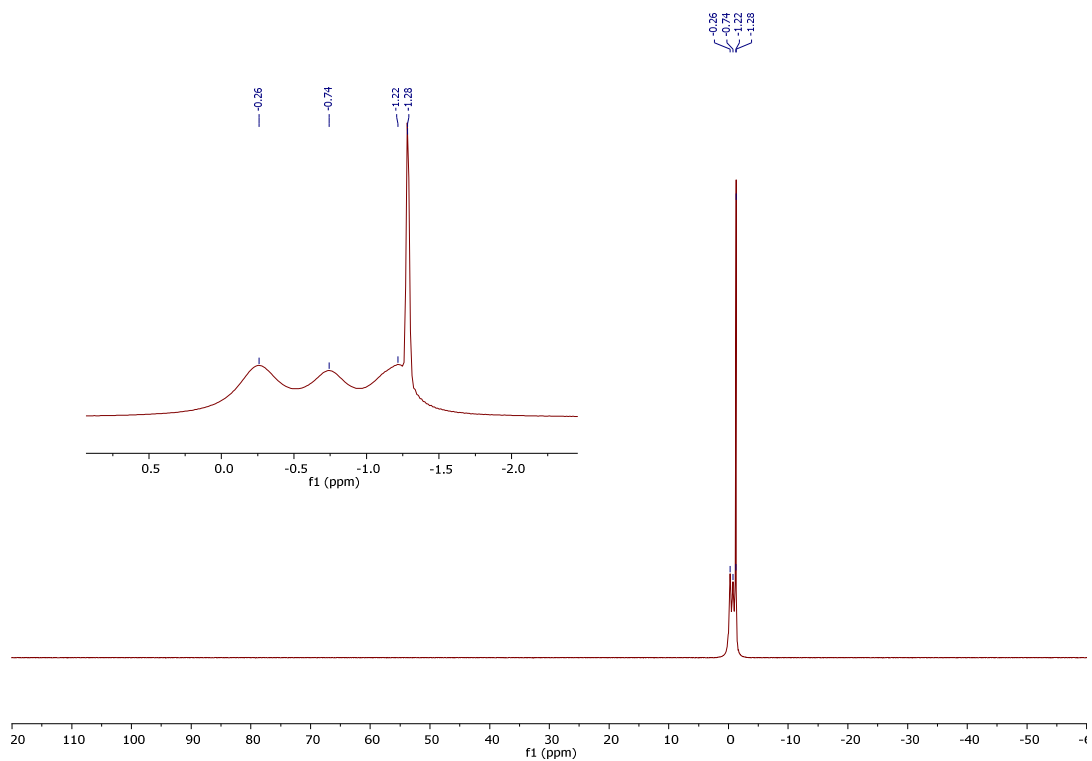

**Figure S12:**  $^{11}\text{B}$ -NMR spectrum of the equimolar mixture of enamide **1b** and  $\text{BF}_3 \cdot \text{Et}_2\text{O}$ .

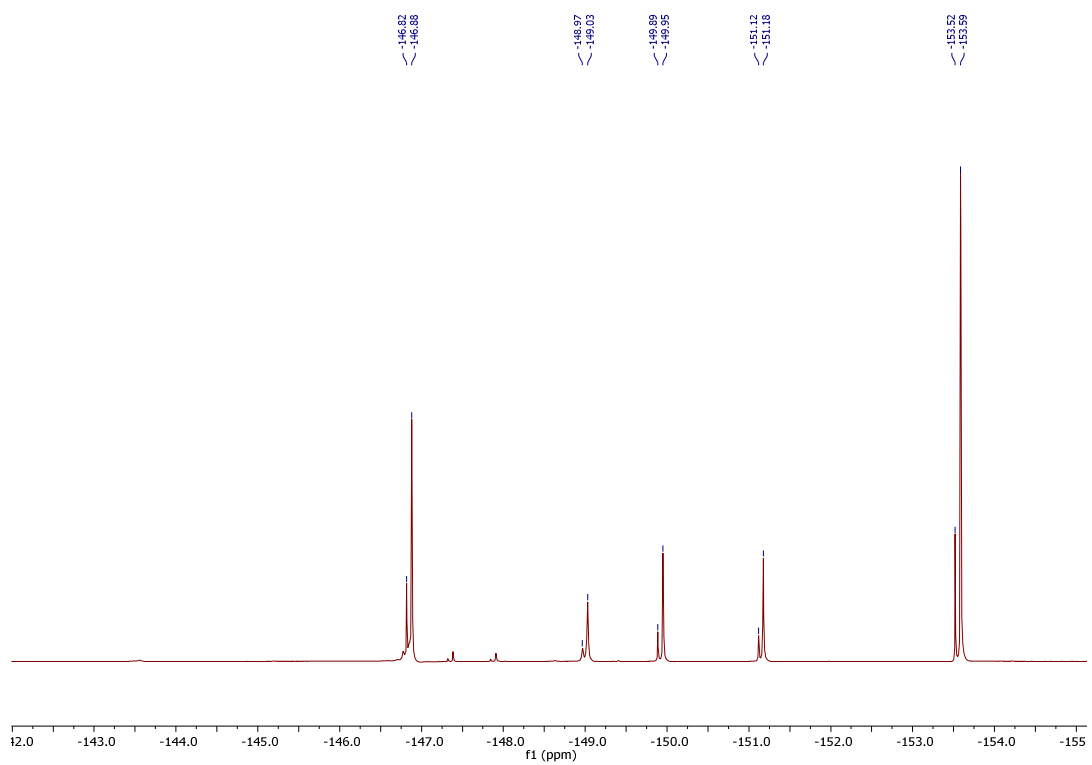

**Figure S13:**  $^{19}\text{F}$ -NMR spectrum of the equimolar mixture of enamide **1b** and  $\text{BF}_3 \cdot \text{Et}_2\text{O}$ .

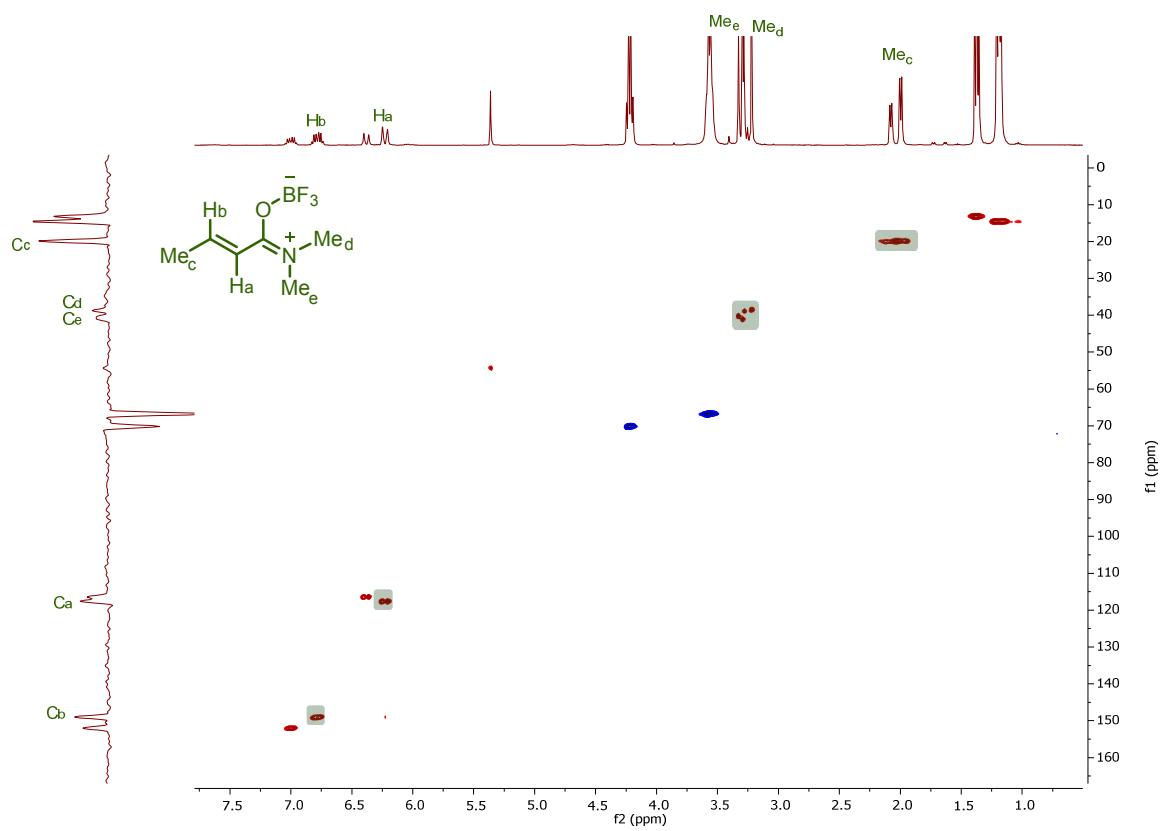

**Figure S14:**  $^1\text{H}$ - $^{13}\text{C}$ -HSQCED spectrum of the equimolar mixture of enamide **1b** and  $\text{BF}_3 \cdot \text{Et}_2\text{O}$ .  
 $\text{BF}_3$ -enamide complex cross-peaks are highlighted.

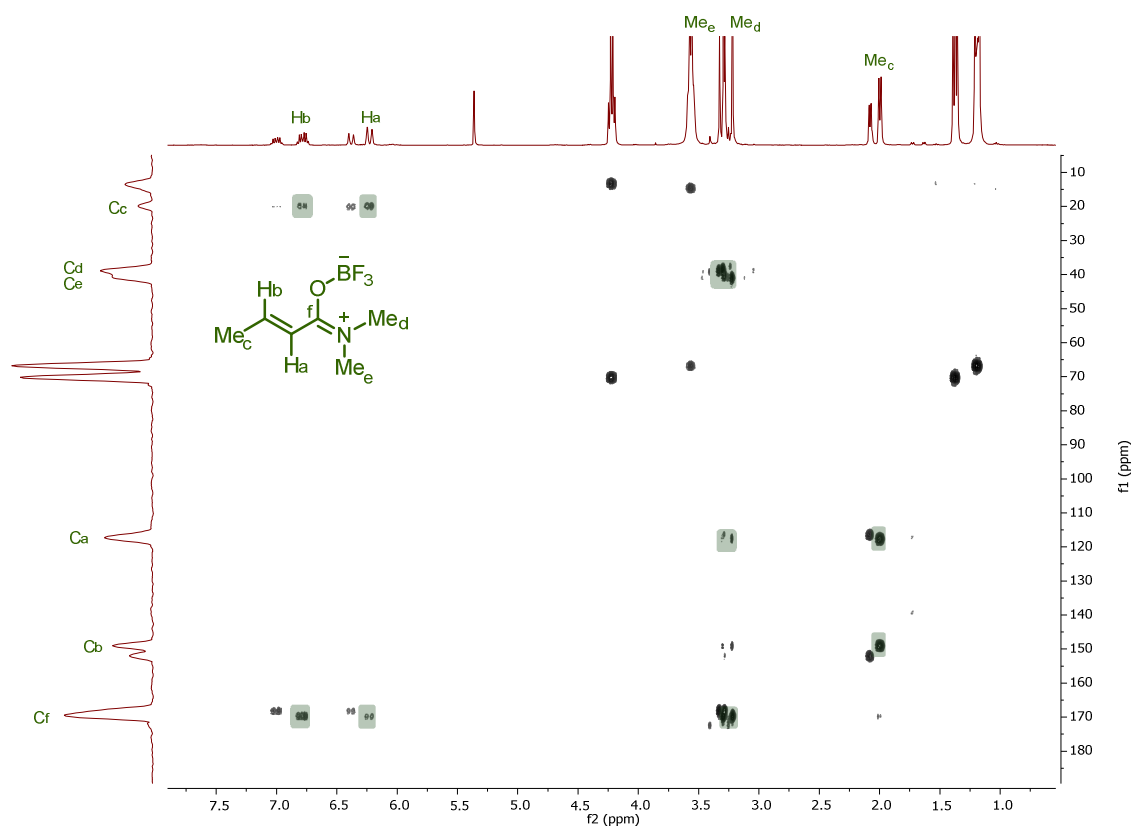

**Figure S15:**  $^1\text{H}$ - $^{13}\text{C}$ -HMBC spectrum of the equimolar mixture of enamide **1b** and  $\text{BF}_3 \cdot \text{Et}_2\text{O}$ .  $\text{BF}_3$ -enamide complex cross-peaks are highlighted.

#### *MeMgBr-amide complex*

A 3 M MeMgBr solution in  $\text{Et}_2\text{O}$  (54  $\mu\text{L}$ , 0.2 mmol) was added to a solution of amide **1b** (6 mg, 0.05 mmol) in  $\text{CD}_2\text{Cl}_2$  (0.6 mL) in a dry NMR tube at  $-78^\circ\text{C}$ . Instantaneous formation of a new species at  $-80^\circ\text{C}$  attributed to MeMgBr/enamide complex was measured by NMR spectroscopy. Only this species was observed in this experiment.

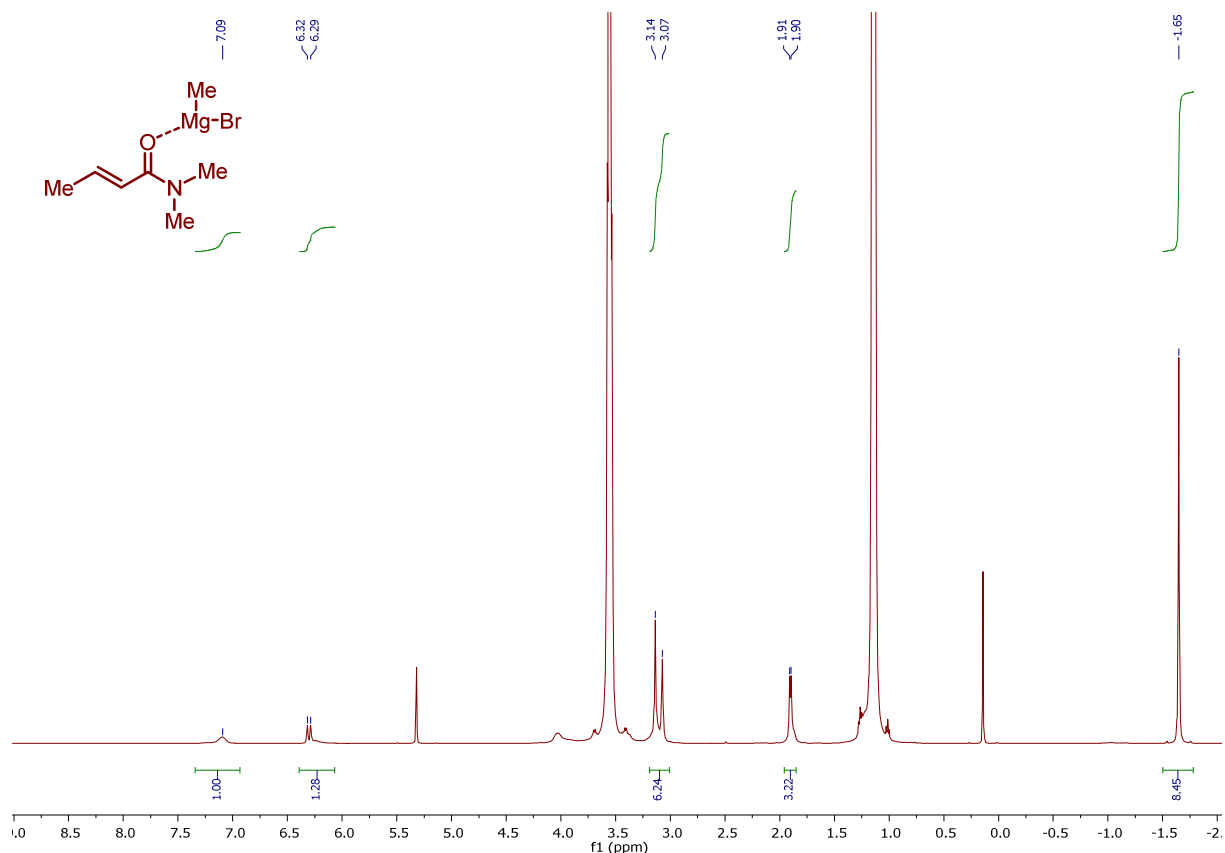

**Figure S16:** <sup>1</sup>H NMR spectrum of the mixture of enamide **1b** and MeMgBr.

*Reaction media before the completion of the ACA reaction*

In order to determine if any of the species discussed above are present in the reaction media a set of reactions was carried out in the presence of TMSOTf or BF<sub>3</sub>·Et<sub>2</sub>O in CD<sub>2</sub>Cl<sub>2</sub> either directly in the NMR tubes or in dry Schlenk flasks at -78 °C and then measured at -80 °C (Figure S17, only the reaction media in the presence of TMSOTf are shown). In a flame-dried Schlenk tube equipped with septum and magnetic stirring bar, CuBr-(*R,S*)-**L1** complex (5.53 mg, 0.0075 mmol, 5 mol%) and amide **1b** (17 mg, 0.15 mmol) were dissolved in CD<sub>2</sub>Cl<sub>2</sub> (1.5 mL) and stirred under nitrogen atmosphere. After stirring at room temperature for 5 minutes, the reaction mixture was cooled to -60 °C and TMSOTf (52 μL, 0.30 mmol) was added. After 15 minutes, MeMgBr (100 μL, 0.30 mmol, 3.0 M in Et<sub>2</sub>O) was added. Then the mixture was transferred to a NMR tube cooled to -78 °C and then measured by NMR spectroscopy at -80 °C.

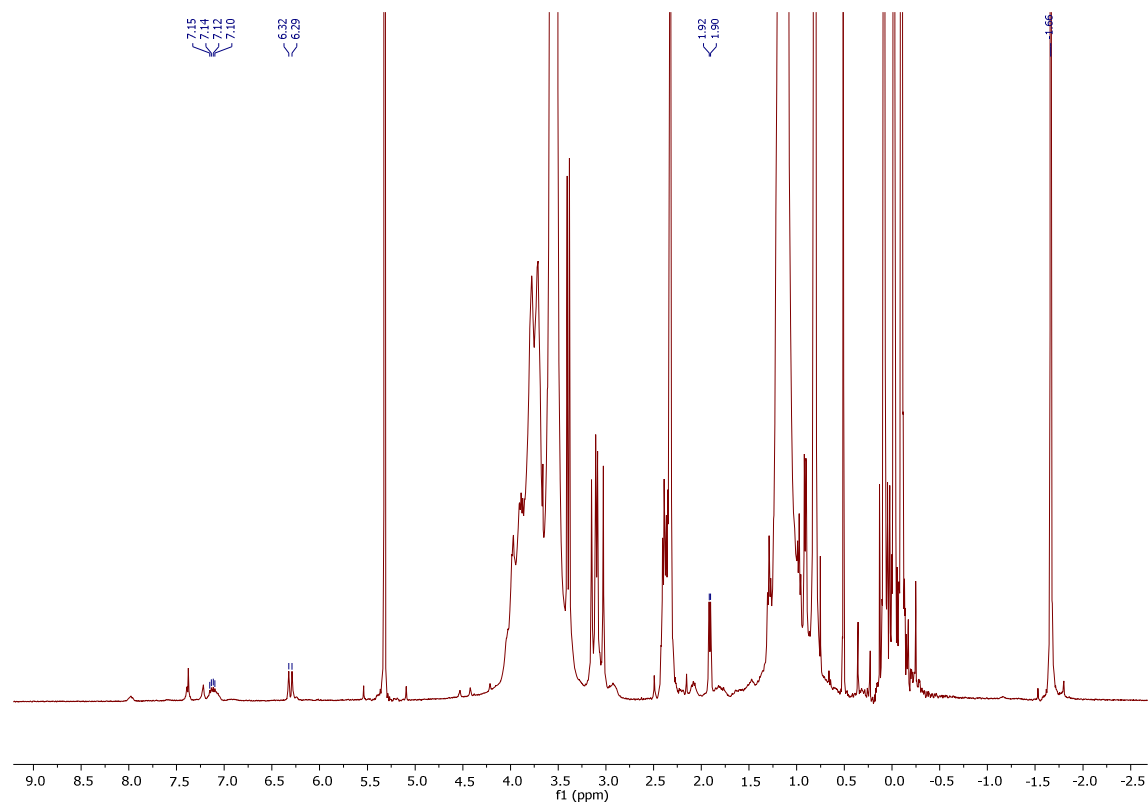

**Figure S17:**  $^1\text{H}$  NMR spectrum of the reaction media in the reaction of enamide **1b** with MeMgBr in the presence of **L1**-CuBr complex and TMSOTf in  $\text{CD}_2\text{Cl}_2$ .

Regardless of the LA used, the only species observed in the reaction media corresponded to the complex derived from the interaction between the enamide and MeMgBr (Figure 3f in the main text). The same complex was also detected when MeMgBr was added to the preformed TMSOTf-enamide or  $\text{BF}_3 \cdot \text{Et}_2\text{O}$ -enamide complexes preformed in the absence of other reaction intermediates. These results suggest that MeMgBr replaces the Lewis acid and forms a more stable complex with the enamide.

### Transmetallation of the Lewis acid by MeMgBr

Transmetallation of the Lewis acid by MeMgBr was also studied by NMR spectroscopy. An equimolar mixture of MeMgBr solution in  $\text{Et}_2\text{O}$  (33  $\mu\text{L}$ , 0.1 mmol) and  $\text{BF}_3 \cdot \text{Et}_2\text{O}$  (12  $\mu\text{L}$ , 0.1 mmol) in  $\text{CD}_2\text{Cl}_2$  (0.6 mL) was prepared in a dry NMR tube under  $\text{N}_2$  atmosphere at  $-78^\circ\text{C}$  and measured by NMR

spectroscopy at  $-80\text{ }^{\circ}\text{C}$ . Formation of  $\text{Me}_4\text{BMgBr}$  ( $-0.74\text{ ppm}$ , q,  $J=3.7\text{ Hz}$  in  $^1\text{H}$  NMR,  $-19.8\text{ ppm}$ , m,  $J=3.7\text{ Hz}$  in  $^{11}\text{B}$  NMR) was immediately detected at  $-80\text{ }^{\circ}\text{C}$  (Figures S18 and S19).

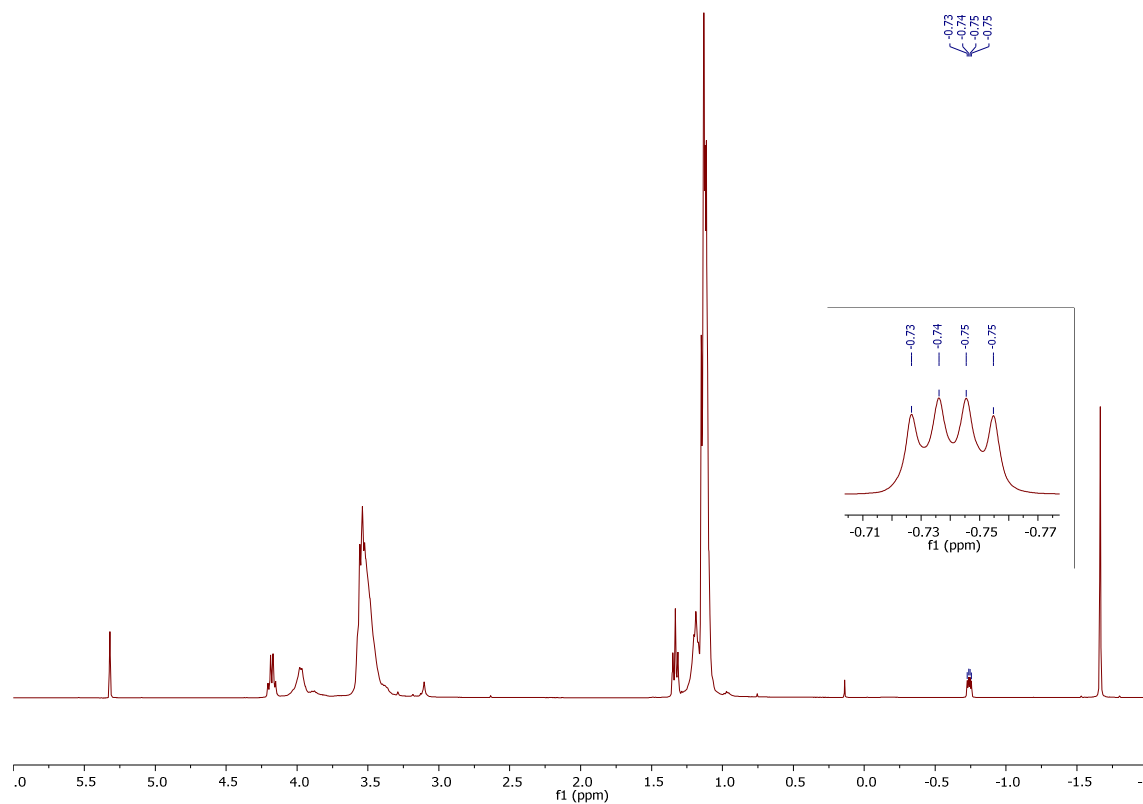

**Figure S18:**  $^1\text{H}$  NMR spectrum of the equimolar mixture of  $\text{MeMgBr}$  and  $\text{BF}_3\cdot\text{Et}_2\text{O}$  in  $\text{CD}_2\text{Cl}_2$ .

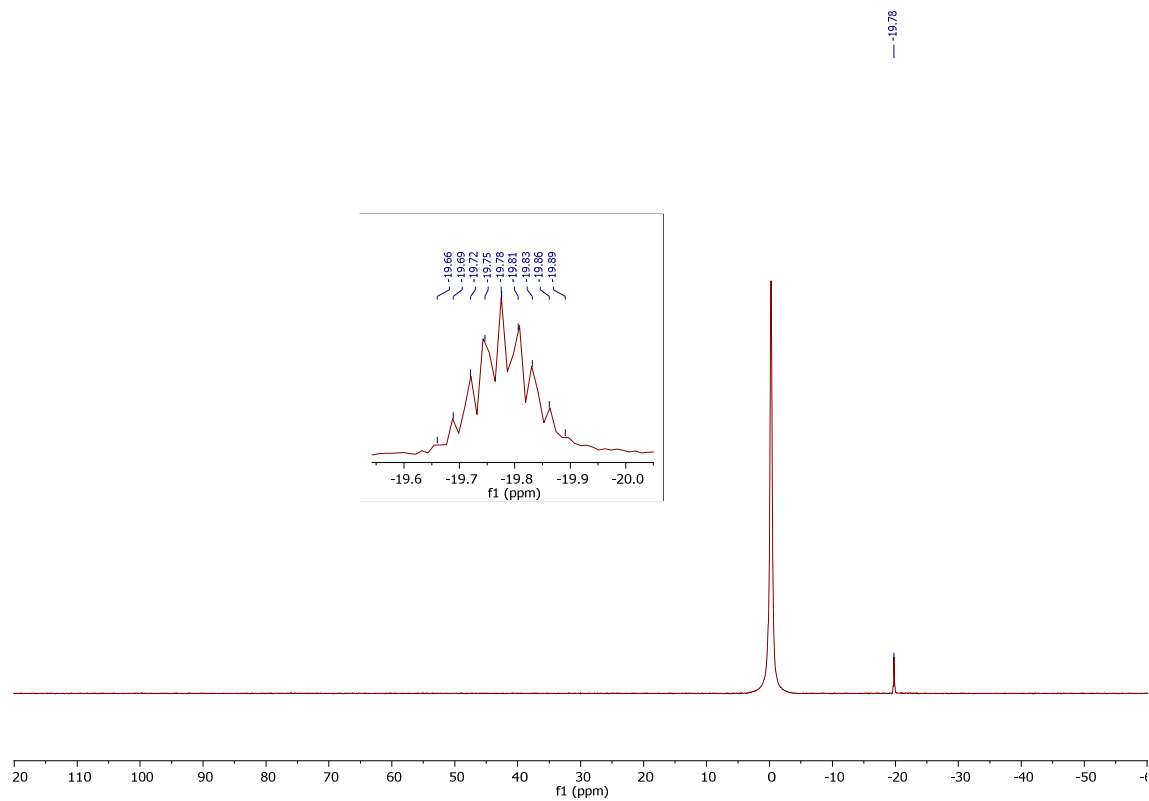

**Figure S19:**  $^{11}\text{B}$  NMR spectrum of the equimolar mixture of  $\text{MeMgBr}$  and  $\text{BF}_3 \cdot \text{Et}_2\text{O}$  in  $\text{CD}_2\text{Cl}_2$ .

Likewise, formation of tetramethylsilane was detected by  $^1\text{H}$  NMR at  $-60^\circ\text{C}$  when  $\text{MeMgBr}$  (solution 3 M in  $\text{Et}_2\text{O}$ , 33  $\mu\text{L}$ , 0.1 mmol) was added to a solution containing  $\text{TMSOTf}$  (18  $\mu\text{L}$ , 0.1 mmol) in  $\text{CD}_2\text{Cl}_2$  (0.6 mL). Formation of  $\text{Me}_4\text{Si}$  (-0.08 ppm in  $^1\text{H}$  NMR) was immediately detected at  $-60^\circ\text{C}$  (figure S20).

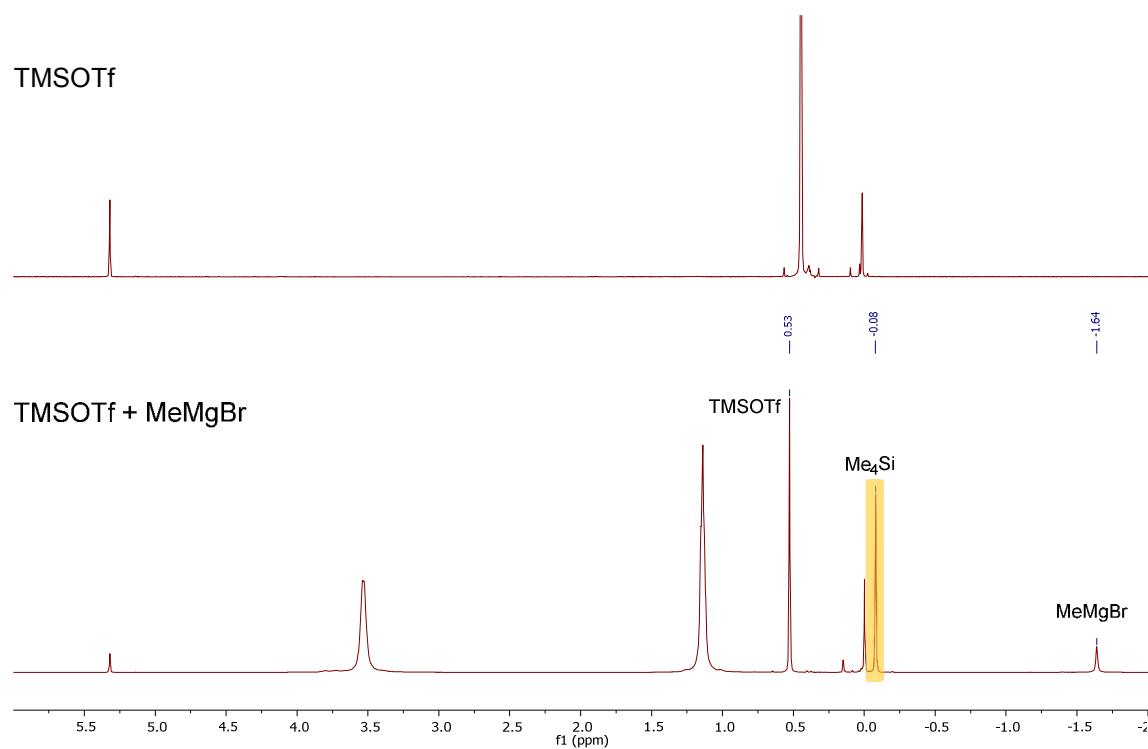

**Figure S20:**  $^1\text{H}$  NMR spectrum of TMSOTf (top) and the equimolar mixture of MeMgBr and TMSOTf in  $\text{CD}_2\text{Cl}_2$  (bottom). Appearance of a new peak of  $\text{Me}_4\text{Si}$  was immediately detected (highlighted).

### Nature of enolates formed as an end product copper ACA reactions

The structure of the final product of the reaction, namely the enolates, was determined by analysis of the reaction crude before quench in  $\text{CD}_2\text{Cl}_2$ .

#### *Catalytic ACA in the presence of TMSOTf (silyl enolate formation)*

In a flame-dried Schlenk tube equipped with septum and magnetic stirring bar,  $\text{CuBr-(R,S}_{\text{Fe}}\text{)-L1}$  complex (5.53 mg, 0.0075 mmol, 5 mol%) and amide **1b** (17 mg, 0.15 mmol) were dissolved in  $\text{CD}_2\text{Cl}_2$  (1.5 mL) and stirred under nitrogen atmosphere. After stirring at room temperature for 5 min., the reaction mixture was cooled to  $-60\text{ }^\circ\text{C}$  and TMSOTf (52  $\mu\text{L}$ , 0.30 mmol) was added. After 15 min., MeMgBr (100  $\mu\text{L}$ , 0.30 mmol, 3.0 M in  $\text{Et}_2\text{O}$ ) was added. After stirring at  $-60\text{ }^\circ\text{C}$  for 18 h, the mixture was transferred to a



NMR tube followed by measurement at  $-80\text{ }^{\circ}\text{C}$ . The final product in the reaction mixture was identified as a TMS-enolate (Figure S21), based on a TOCSY experiment. (*Z*)-configuration was assigned to the enolate, based on series of 1D ROESY experiments (Figure S23). Full characterization by  $^1\text{H}$ - $^{13}\text{C}$ -HSQCED (Figure S24),  $^1\text{H}$ - $^{13}\text{C}$ -HMBC (Figure S25) and  $^1\text{H}$ - $^{29}\text{Si}$ -HMBC (figure S26) was carried out.

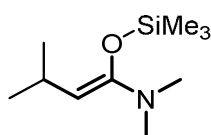

$^1\text{H}$  NMR ( $\text{CD}_2\text{Cl}_2$ , 400 MHz):  $\delta$  3.39 (d,  $J = 9.4$  Hz, 1H), 2.42-2.32 (m, 1H), 2.33 (s, 6H), 0.81 (d,  $J = 6.7$  Hz, 6H), 0.08 (s, 9H).

$^{13}\text{C}$  NMR ( $\text{CD}_2\text{Cl}_2$ , 100 MHz):  $\delta$  152.1, 95.7, 40.4, 25.3, 24.5, -0.4.

$^{29}\text{Si}$  NMR ( $\text{CD}_2\text{Cl}_2$ , 79.5 MHz):  $\delta$  19.3.

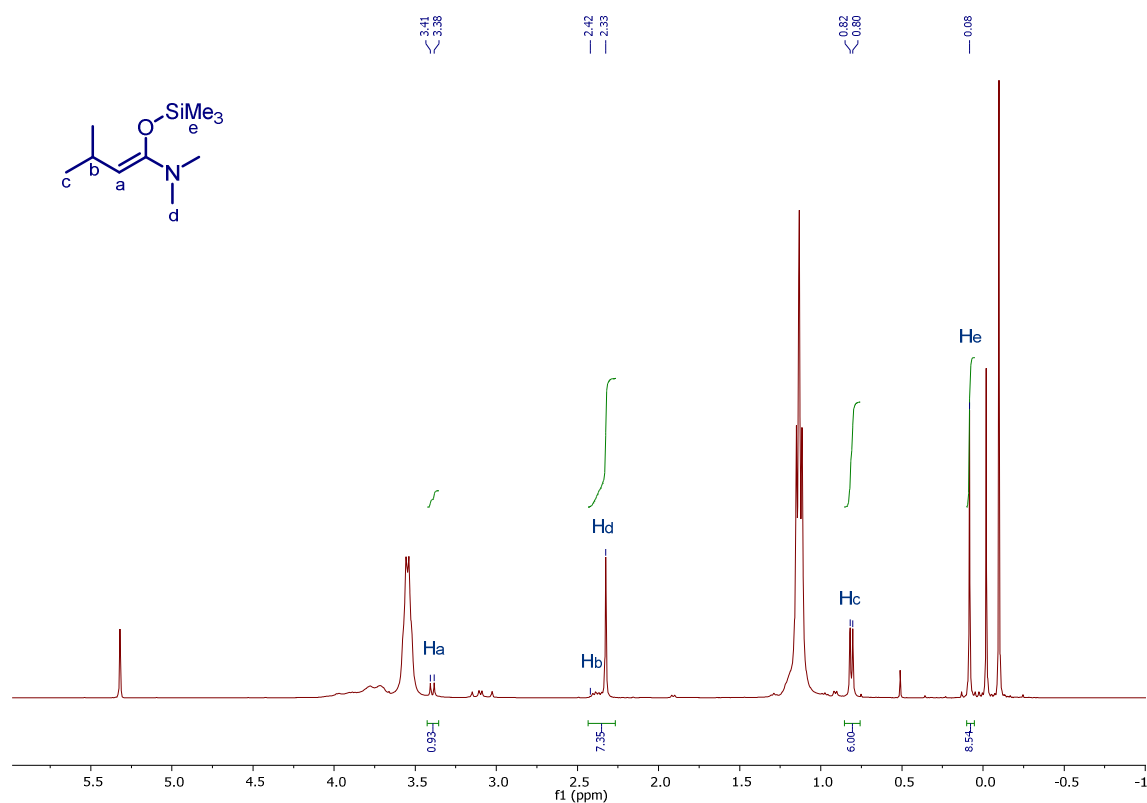

**Figure S21:**  $^1\text{H}$  NMR spectrum of the crude of the reaction in the presence of TMSOTf.

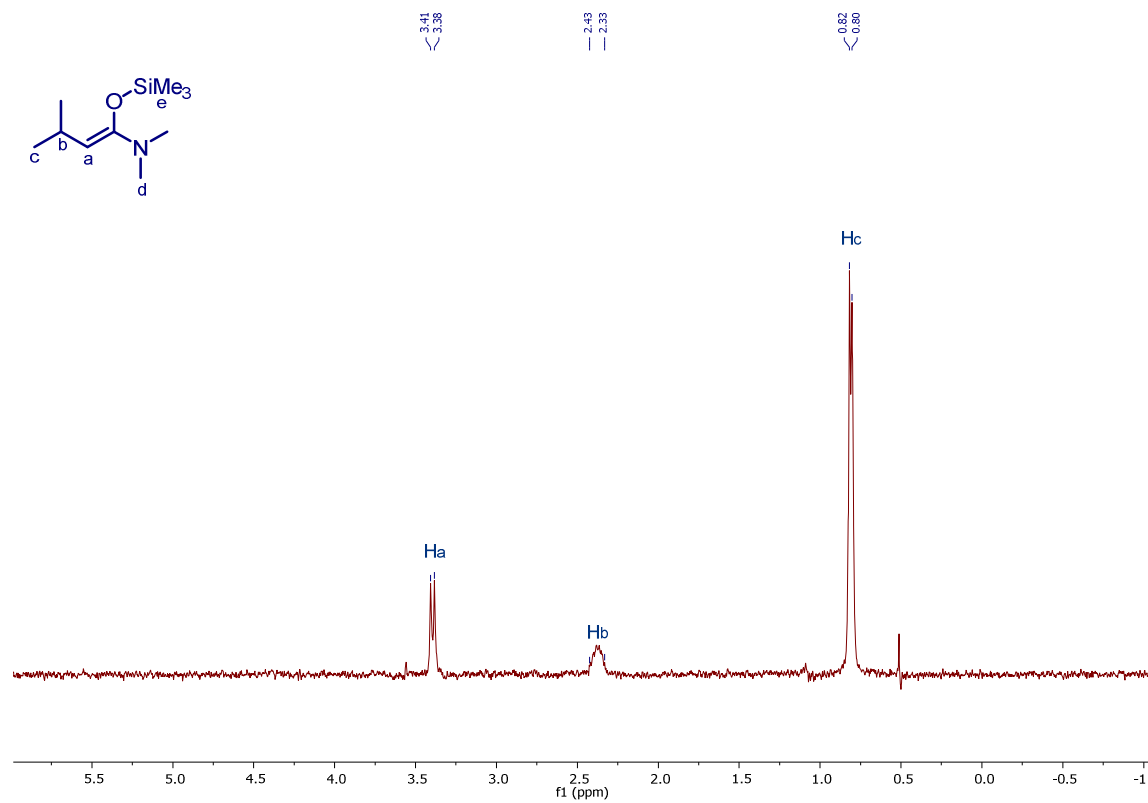

**Figure S22:** TOCSY experiment (irradiating nucleus Ha) of the crude of the reaction in the presence of TMSOTf.

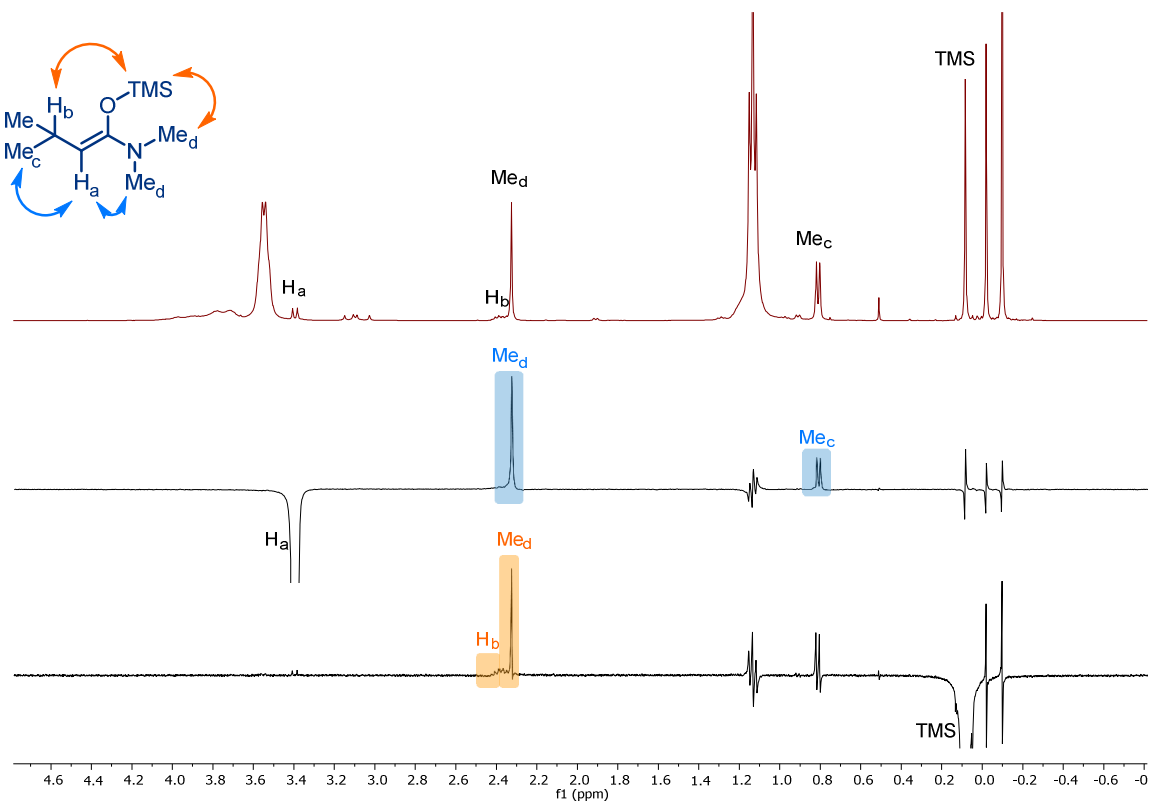

**Figure S23:** 1D ROESY experiments of the crude of the reaction in the presence of TMSOTf. Z-enolate configuration was determined by observation of NOE between the TMS moiety and H<sub>b</sub> (orange) and between H<sub>a</sub> and NMe moiety and *gem*-dimethyl moiety (Me<sub>c</sub>, blue).



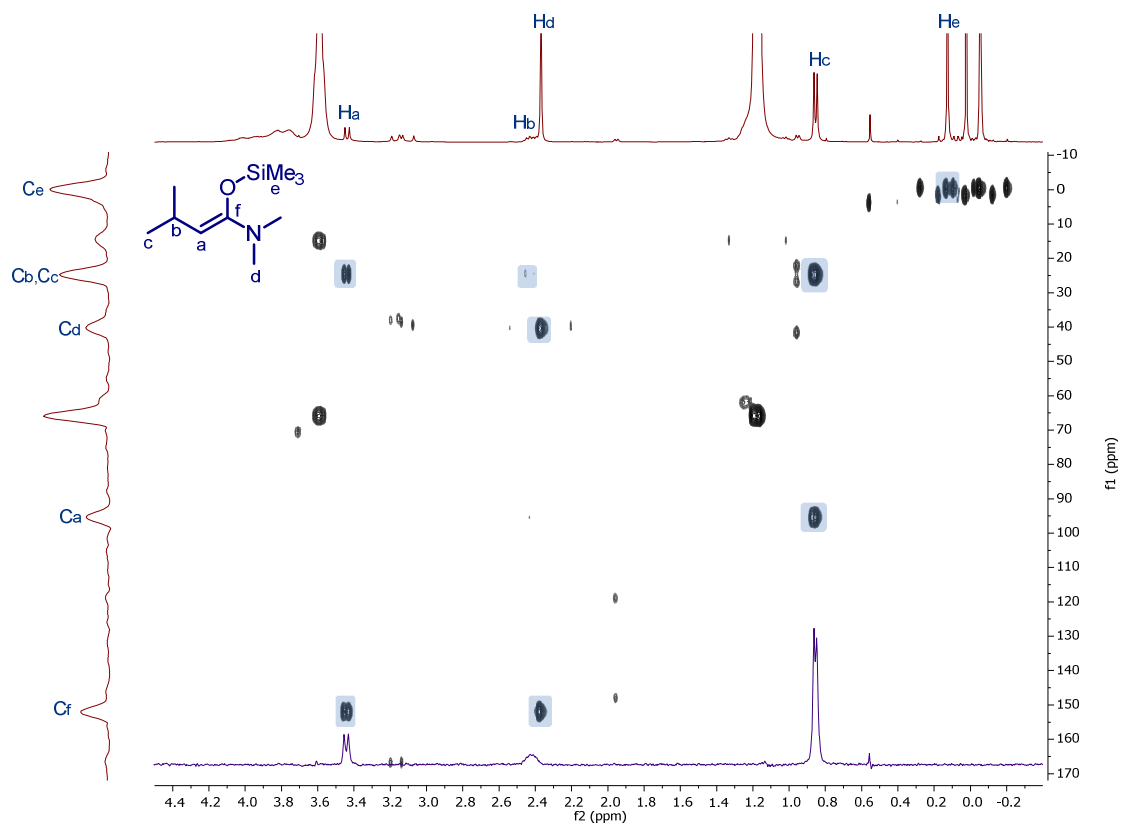

**Figure S25:**  $^1\text{H}$ - $^{13}\text{C}$ -HMBC spectrum of the crude of the reaction in the presence of TMSOTf. TMS-enolate peaks are highlighted.

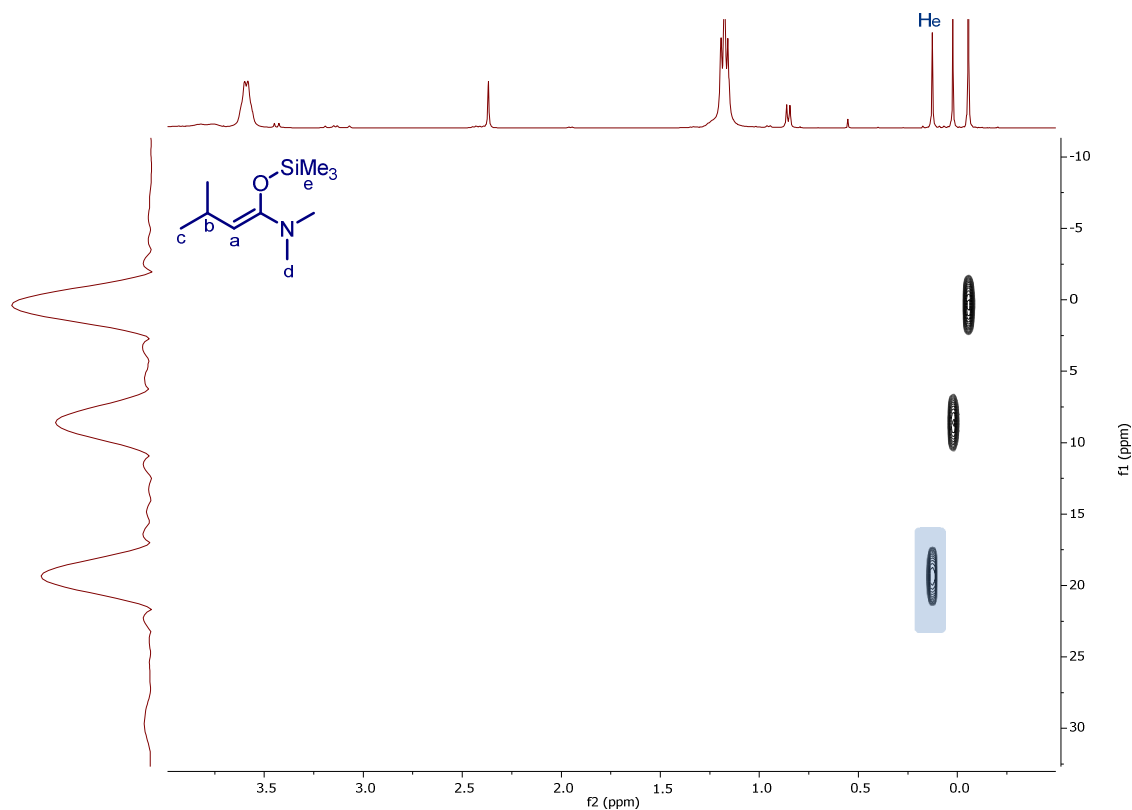

**Figure S26:**  $^1\text{H}$ - $^{29}\text{Si}$ -HMBC spectrum of the crude of the reaction in the presence of TMSOTf. TMS-enolate peaks are highlighted.

*Catalytic ACA in the presence of  $\text{BF}_3 \cdot \text{Et}_2\text{O}$  (boron enolate formation)*

In a flame-dried Schlenk tube equipped with septum and magnetic stirring bar,  $\text{CuBr}-(R,S_{\text{Fc}})\text{-L1}$  complex (5.53 mg, 0.0075 mmol, 5 mol%) and amide **1b** (17 mg, 0.15 mmol) were dissolved in  $\text{CD}_2\text{Cl}_2$  (1.5 mL) and stirred under nitrogen atmosphere. After stirring at room temperature for 5 min., the reaction mixture was cooled to  $-60\text{ }^\circ\text{C}$  and  $\text{BF}_3 \cdot \text{Et}_2\text{O}$  (37  $\mu\text{L}$ , 0.30 mmol) was added. After 15 min.,  $\text{MeMgBr}$  (100  $\mu\text{L}$ , 0.30 mmol, 3.0 M in  $\text{Et}_2\text{O}$ ) was added. After stirring at  $-60\text{ }^\circ\text{C}$  for 18 h, the mixture was transferred to a NMR tube, cooled and measured by NMR spectroscopy at  $-80\text{ }^\circ\text{C}$ . A  $\text{BF}_3$ -enolate structure was assigned based on  $^1\text{H}$  NMR (Figure S27). Enolate proton ( $\text{H}_a$ ) was detected in the crude and with a TOCSY

experiment (Figure S28) Ha, Hb, Hc protons were assigned. Full characterization of the enolate was done by  $^1\text{H}$ - $^{13}\text{C}$ -HSQCED (Figure S29) and  $^1\text{H}$ - $^{13}\text{C}$ -HMBC (Figure S30) experiments.

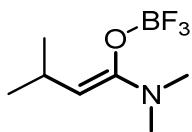

$^1\text{H}$  NMR ( $\text{CD}_2\text{Cl}_2$ , 400 MHz):  $\delta$  4.78 (d,  $J = 10.3$  Hz, 1H), 2.66 (s, 6H), 2.50-2.42 (m, 1H), 0.89 (d,  $J = 6.6$  Hz, 6H).

$^{13}\text{C}$  NMR ( $\text{CD}_2\text{Cl}_2$ , 100 MHz):  $\delta$  132.7, 111.6, 44.5, 25.5, 22.7.

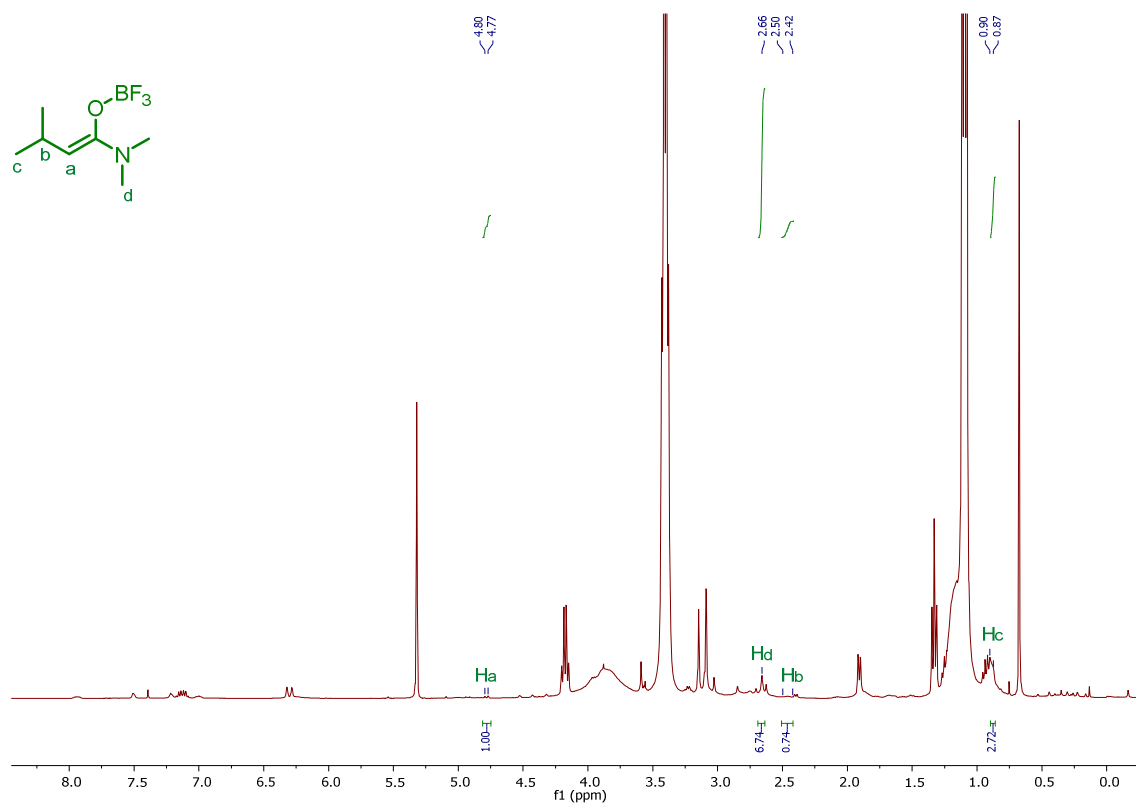

**Figure S27:**  $^1\text{H}$  NMR spectrum of the crude of the reaction in the presence of  $\text{BF}_3 \cdot \text{Et}_2\text{O}$ .

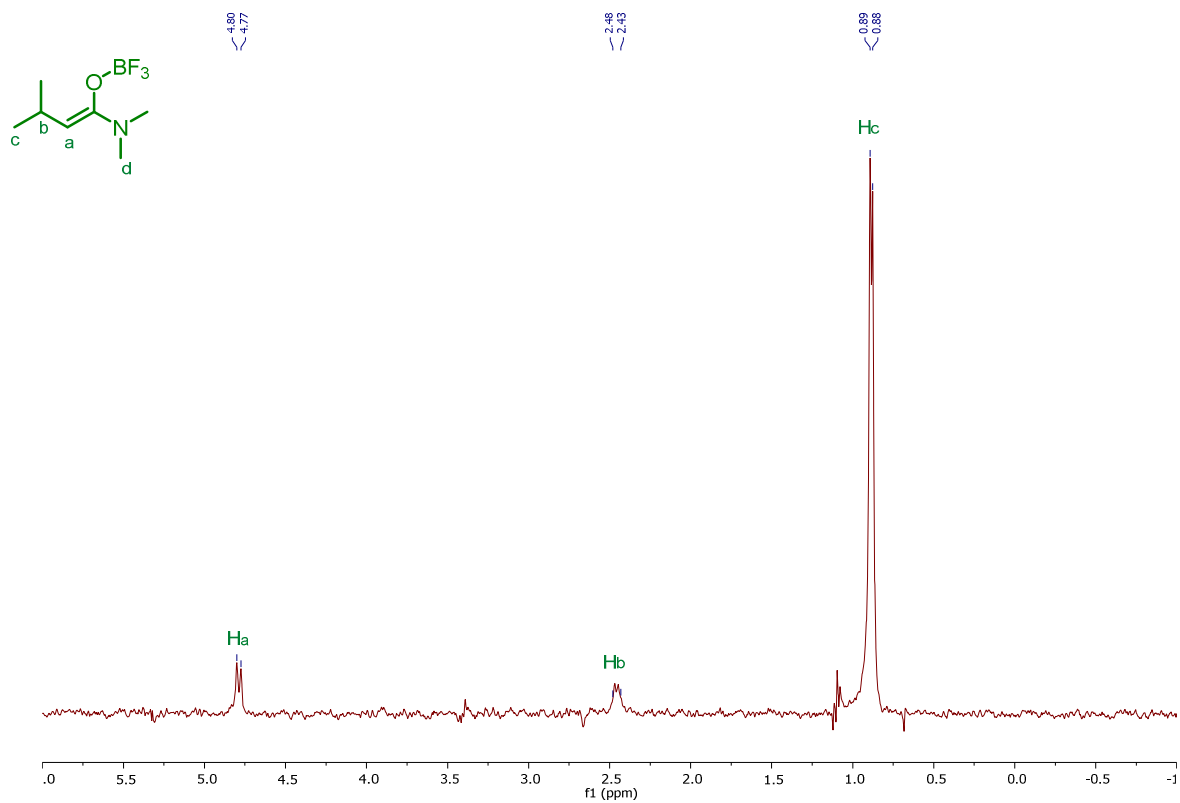

**Figure S28:** TOCSY experiment (irradiating nucleus Ha) of the crude of the reaction in the presence of  $\text{BF}_3 \cdot \text{Et}_2\text{O}$ .



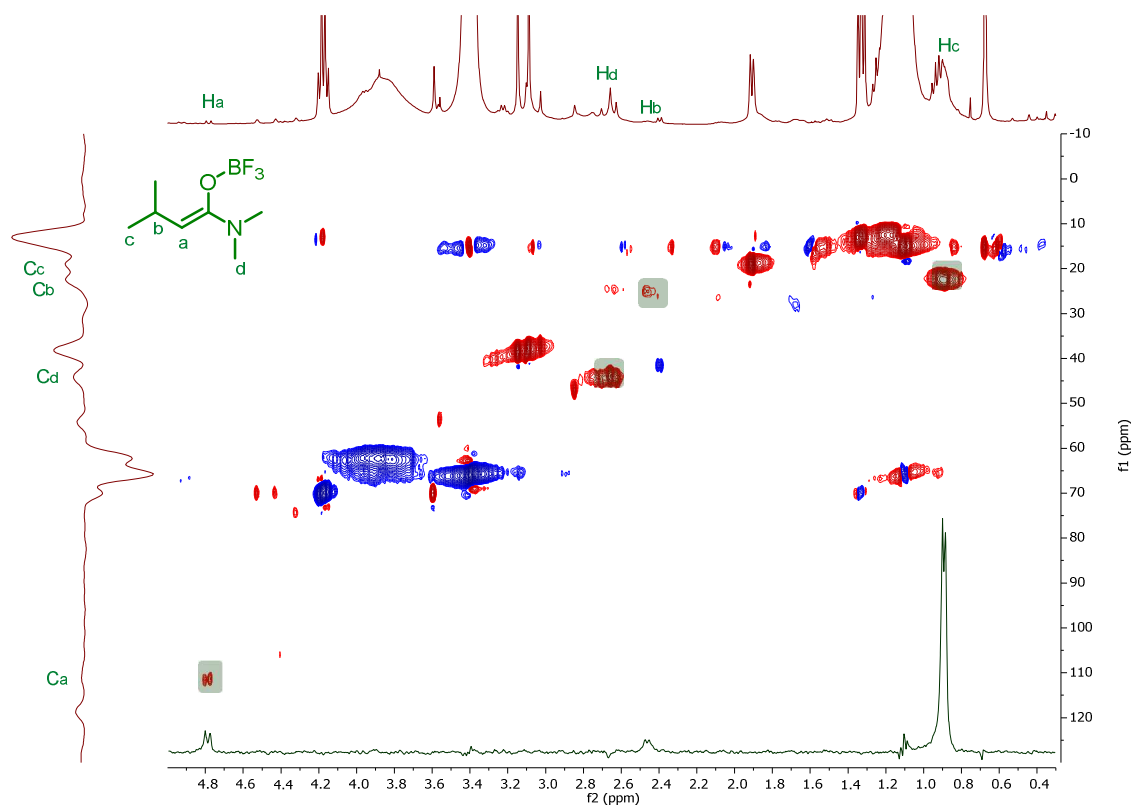

**Figure S29:**  $^1\text{H}$ - $^{13}\text{C}$ -HSQCED spectrum of the crude of the reaction in the presence of  $\text{BF}_3 \cdot \text{Et}_2\text{O}$ .  $\text{BF}_3$ -enolate peaks are highlighted.

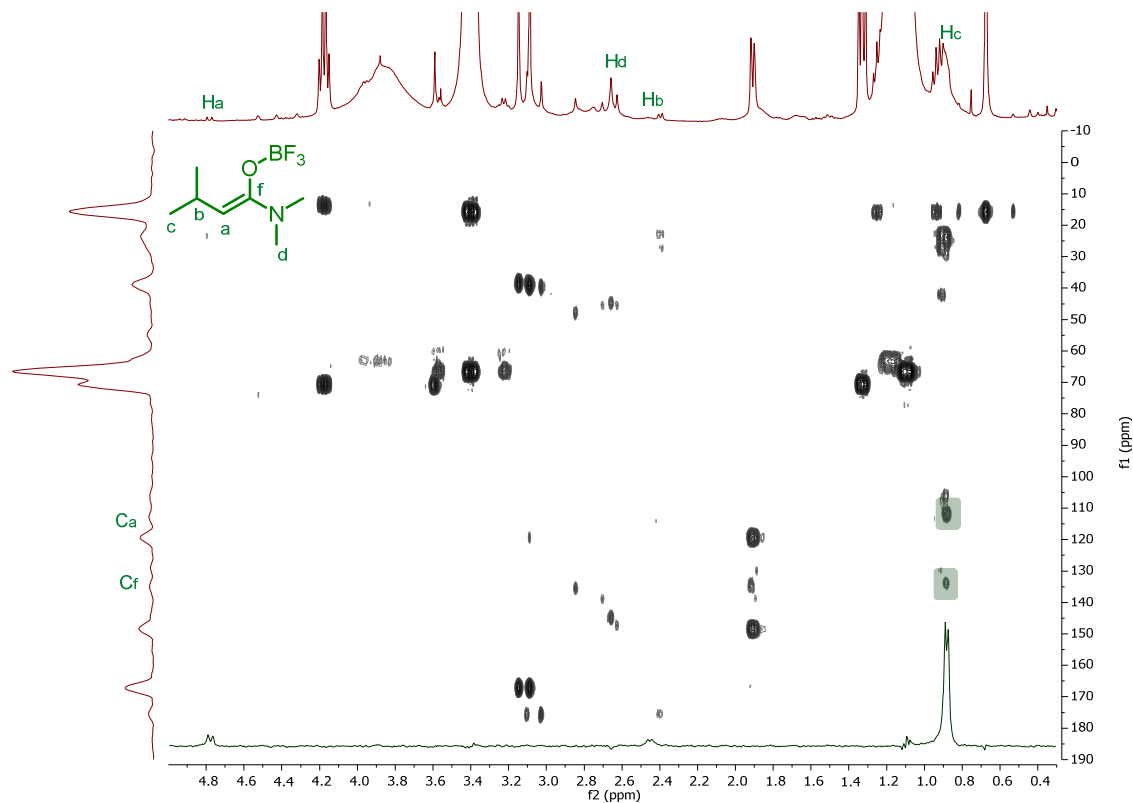

**Figure S30:**  $^1\text{H}$ - $^{13}\text{C}$ -HMBC spectrum of the crude of the reaction in the presence of  $\text{BF}_3 \cdot \text{Et}_2\text{O}$ .  
 $\text{BF}_3$ -enolate peaks are highlighted.

However, the configuration of the enolate could not be determined by HOESY experiments since no clear cross-peak  $^1\text{H}$ - $^{19}\text{F}$  was observed. To prove that the enolate we observed in this case is not a magnesium enolate we have prepared Mg-enolate independently in the absence of LA and fully characterize it by NMR spectroscopy.

*CA in the absence of Lewis acid (magnesium enolate formation)*

A 3 M MeMgBr solution in  $\text{Et}_2\text{O}$  (67  $\mu\text{L}$ , 0.2 mmol) was added to a solution of amide **1a** (12 mg, 0.10 mmol) in  $\text{CD}_2\text{Cl}_2$  (0.6 mL) in a dry NMR tube under  $\text{N}_2$  atmosphere. After 18 h the mixture was measured by NMR spectroscopy at  $-80^\circ\text{C}$ . A Mg-enolate structure was assigned based on  $^1\text{H}$  NMR (Figure S31). Enolate proton (Ha) was detected in the crude and a TOCSY experiment (figure S32) was carried out to

assign the spin system (Ha, Hb, Hc). Full characterization by  $^1\text{H}$ - $^{13}\text{C}$ -HSQCED (Figure S33) and  $^1\text{H}$ - $^{13}\text{C}$ -HMBC (Figure S34) was carried out.

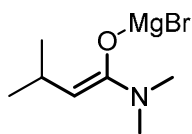

$^1\text{H}$  NMR ( $\text{CD}_2\text{Cl}_2$ , 400 MHz):  $\delta$  3.97 (d,  $J = 8.7$  Hz, 1H), 2.41 (s, 6H), 2.38-2.27 (m, 1H), 0.84 (d,  $J = 6.6$  Hz, 6H).

$^{13}\text{C}$  NMR ( $\text{CD}_2\text{Cl}_2$ , 100 MHz):  $\delta$  129.7, 110.0, 40.4, 26.9, 24.1.

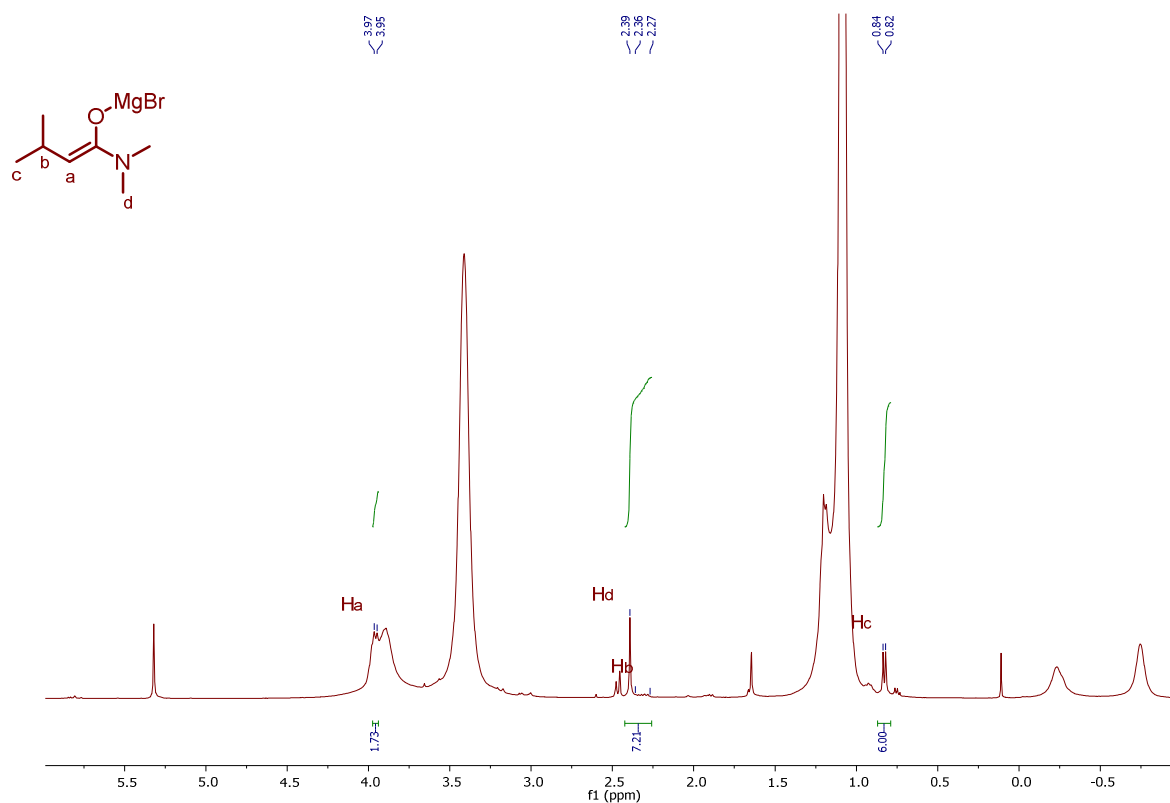

**Figure S31:**  $^1\text{H}$  NMR spectrum of the crude of the reaction in the absence of Lewis acid.

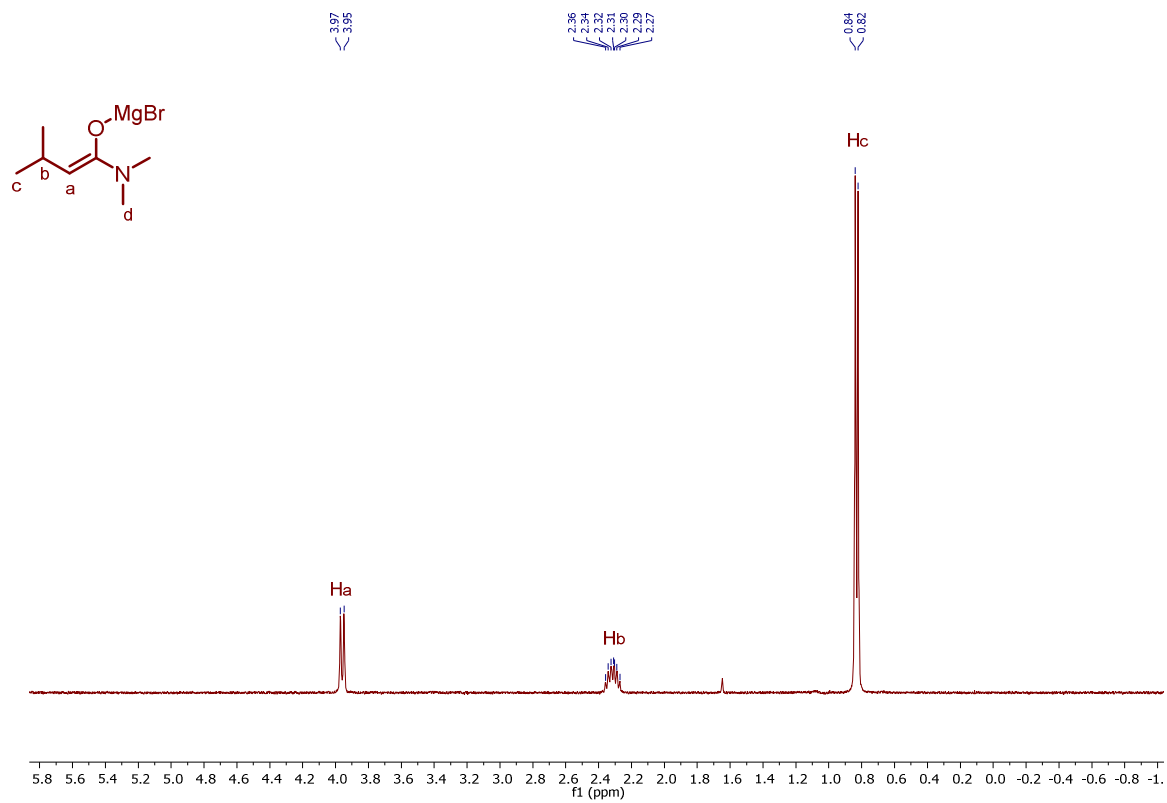

**Figure S32:** TOCSY experiment (irradiating nucleus Ha) of the crude of the reaction in the absence of Lewis acid.

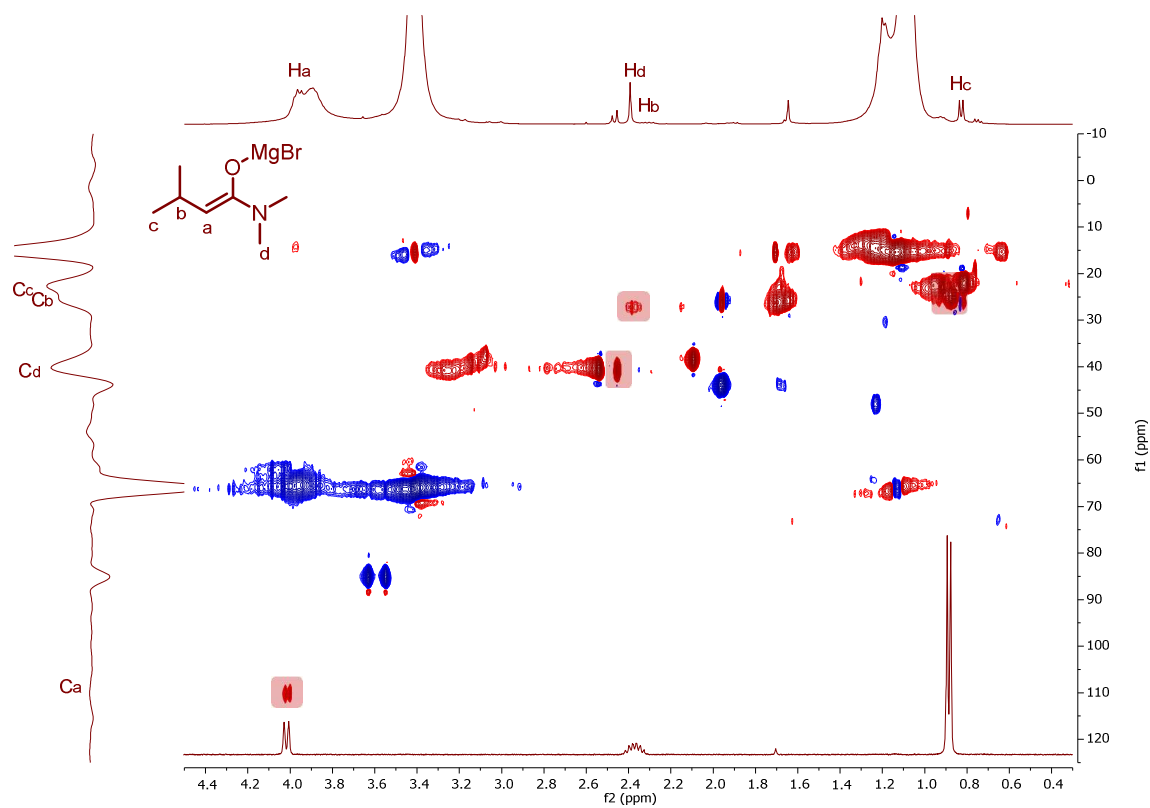

**Figure S33:**  $^1\text{H}$ - $^{13}\text{C}$ -HSQCED spectrum of the crude of the reaction in the absence of Lewis acid.  
Mg-enolate peaks are highlighted.

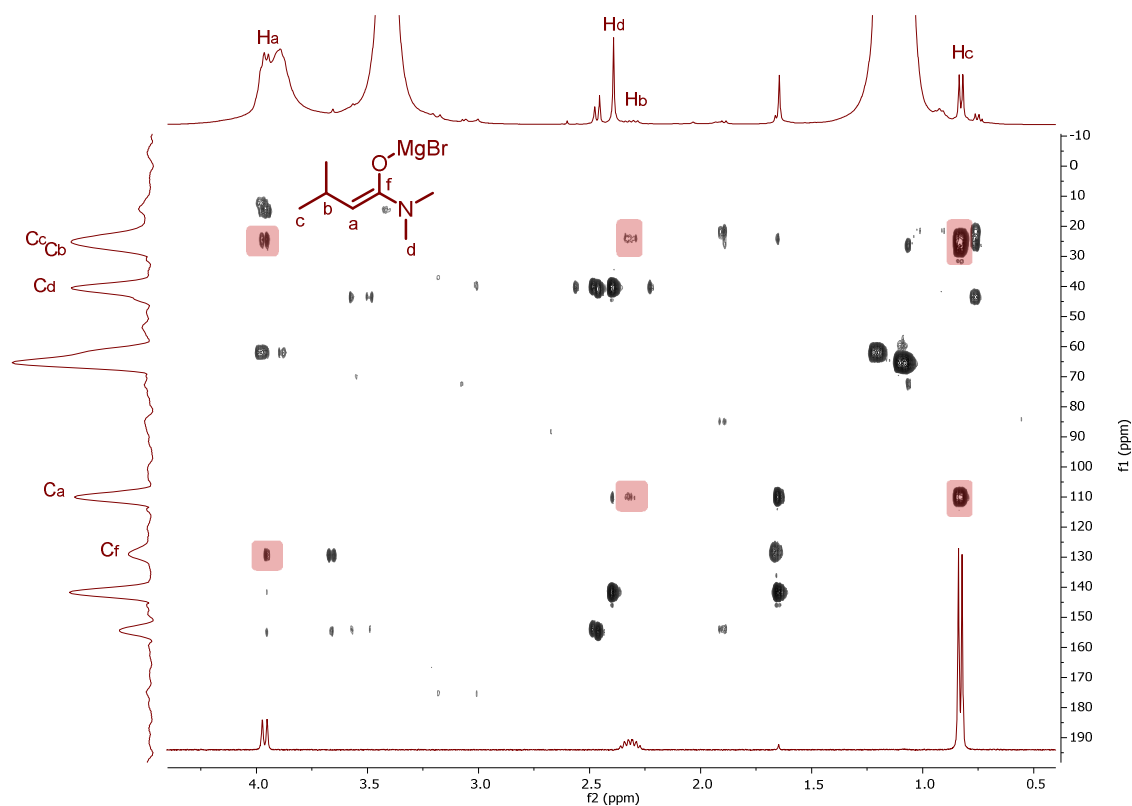

**Figure S34:**  $^1\text{H}$ - $^{13}\text{C}$ -HMBC spectrum of the crude of the reaction in the absence of Lewis acid.  
Mg-enolate peaks are highlighted.

This set of experiments shows that three different enolates, namely TMS-enolate (in the presence of TMSOTf),  $\text{BF}_3$ -enolate (in the presence of  $\text{BF}_3 \cdot \text{Et}_2\text{O}$ ) and Mg-enolate (in the absence of Lewis acid) are formed in the reaction mixture, depending on the reaction components

## 7. Synthesis of enamides: procedures and characterization of products

$\alpha,\beta$ -Unsaturated amides **1a-x** were prepared from the corresponding acyl chloride (Method 2:<sup>1</sup>  $\text{RCOCl}$ , amine; Method 3:<sup>1</sup>  $\text{RCOCl}$ , amine,  $\text{NEt}_3$ ), from the corresponding carboxylic acid (Method 1:<sup>1</sup> (i)  $\text{RCO}_2\text{H}$ ,  $\text{SOCl}_2$ , cat. DMF (ii) amine,  $\text{NEt}_3$ ), from the corresponding alkenes (Method 6)<sup>2</sup>, and from other derivative compounds (Method 4<sup>3</sup>, Method 5<sup>4,5</sup>). **1a-1b**, **1f-j**, **1l-m**, **1o**, **1q-s**, **1v** are known compounds.

### Method 1

To a cold 0 °C solution of the corresponding carboxylic acid (5 mmol) in DCM (4 mL) was added thionyl chloride (6 mmol) and dry DMF (14  $\mu$ L). The solution was then stirred at room temperature for 2 h and concentrated under reduced pressure to remove residual thionyl chloride. The resulting residue was re-dissolved in DCM (4 mL), cooled at 0 °C and the corresponding amine (8 mmol) was added. Dry triethylamine (6.6 mmol) was added and stirring was continued at ambient temperature (3 h). The solvent was removed under reduced pressure and DCM (14 mL) was added. The organic phase was washed with dilute hydrochloric acid (2.0 M, 2 mL  $\times$  2), water (3 mL  $\times$  2), and brine (4 mL), and dried over MgSO<sub>4</sub>. After removal of the solvent, the corresponding enamides were obtained.

### Method 2

A solution of acyl chloride (0.96 mL, 10 mmol) in 6.3 mL dry Et<sub>2</sub>O was cooled to 0 °C in an ice-bath. Anhydrous dimethylamine (2.0 M in THF, 10 mL, 20 mmol) was added for over 5 min and the reaction mixture was allowed to warm to room temperature (12 h). The solvents were evaporated under reduced pressure. Product **1b** was obtained after purification by column chromatography.

### Method 3

To a cold 0 °C solution of the corresponding acyl chloride (5 mmol) in DCM (4 mL) was added the corresponding amine (8 mmol). Dry triethylamine (6.6 mmol) was added and stirring was continued at ambient temperature (3 h). The solvent was removed under reduced pressure and DCM (14 mL) was added. The organic phase was washed with dilute hydrochloric acid (2.0 M, 2 mL  $\times$  2), water (3 mL  $\times$  2), and brine (4 mL), and dried over MgSO<sub>4</sub>. After removal of the solvent, the corresponding enamides were obtained.

#### Method 4

A solution of *N*-methyl-4-methylbenzenesulfonamide (1.85 g, 10 mmol) in anhydrous THF (20 mL) cooled at 0 °C was added under nitrogen a solution of *n*-BuLi (1.6 M in hexanes, 6.9 mL, 11 mmol) and the resulting mixture was stirred for 15 min. Subsequently, crotonyl chloride (1.0 mL, 11 mmol) dissolved in anhydrous THF (5 mL) was added and the mixture was left to warm to room temperature during 2 h. Saturated aqueous NH<sub>4</sub>Cl solution was added and the mixture was extracted with DCM (14 mL). The organic phase was washed with dilute hydrochloric acid (2.0 M, 2 mL × 2), water (3 mL × 2), and brine (4 mL), and dried over MgSO<sub>4</sub>. After removal of the solvent, product **1g** were obtained.

#### Method 5

LDA (1.0 M in THF/hexane, 6.4 mL, 6.4 mmol) was added to a solution of 1-methyl-2-piperidinone (0.66 mL, 5.8 mmol) in 4 mL of THF under nitrogen at –50 °C. After it was stirred at –50 °C for 45 min, the anion solution was transferred into a solution of phenylselenenyl chloride (1.22 g, 6.4 mmol) in 4 mL of THF at –78 °C under nitrogen. The reaction mixture was stirred at –78 °C for 7 h and quenched with water. Then, it was extracted with DCM. The organic layer was then dried (MgSO<sub>4</sub>), filtered and concentrated under reduced pressure. The crude mixture was purified by column chromatography on silica gel (SiO<sub>2</sub>, pentane:Et<sub>2</sub>O 1:2) to afford 1-Methyl-3-(phenylseleno)-2-piperidinone (65% yield) as a colorless oil. Then, a solution of MCPBA (77%, 0.84 g, 3.8 mmol) in anhydrous DCM (10 mL) was added to a solution of 1-methyl-3-(phenylseleno)-2-piperidinone (0.67 g, 2.5 mmol) in anhydrous DCM (10 mL) cooled at 0 °C. The mixture was allowed to rise to room temperature, and stirring was continued for 3 h. Saturated aqueous NaHCO<sub>3</sub> was added, and the aqueous layer was extracted with DCM. The organic layer was then dried (MgSO<sub>4</sub>), filtered and concentrated under reduced pressure. The crude mixture was purified by column chromatography on silica gel (SiO<sub>2</sub>, Et<sub>2</sub>O) to afford the corresponding enamide **1j** (89% yield).



## Method 6

The corresponding alkene (7.5 mmol) and *N,N*-dimethylacrylamide (5 mmol) were added simultaneously to a stirred solution of 5 mol% of second generation Grubbs catalyst in DCM (20 mL) at room temperature. The reaction was refluxed under nitrogen for 16 h. The solvent and the remaining *N,N*-dimethylacrylamide were removed under reduced pressure and the corresponding enamide was purified by column chromatography.

### (*E*)-*N,N*-Dimethylhex-2-enamide (**1a**)<sup>1</sup>

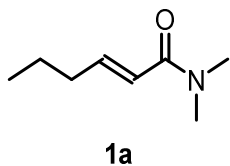

The product **1a** was synthesized following Method 1 and obtained as a colorless oil in 86 % yield.

<sup>1</sup>H NMR (CDCl<sub>3</sub>, 400 MHz): δ 6.86 (dt, *J* = 15.1, 7.0 Hz, 1H, CH=CH), 6.24 (dt, *J* = 15.1, 1.3 Hz, 1H, CH=CH), 3.07 (s, 3H, NCH<sub>3</sub>), 2.99 (s, 3H, NCH<sub>3</sub>), 2.18 (q, *J* = 7.1 Hz, 2H, CH<sub>2</sub>CH), 1.48 (sex (qt), *J* = 7.4 Hz, 2H, CH<sub>2</sub>CH<sub>3</sub>), 0.93 (t, *J* = 7.4 Hz, 3H, CH<sub>2</sub>CH<sub>3</sub>).

### (*E*)-*N,N*-Dimethylbut-2-enamide (**1b**)<sup>1</sup>

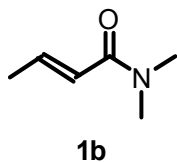

The product **1b** was synthesized following Method 2 and obtained as a colorless liquid after column chromatography (SiO<sub>2</sub>, Et<sub>2</sub>O) in 90 % yield.

<sup>1</sup>H NMR (CDCl<sub>3</sub>, 400 MHz): δ 6.87 (dq, *J* = 15.0, 6.9 Hz, 1H, CH=CH), 6.27 (dq, *J* = 15.0, 1.7 Hz, 1H, CH=CH), 3.06 (s, 3H, NCH<sub>3</sub>), 2.99 (s, 3H, NCH<sub>3</sub>), 1.87 (dd, *J* = 6.9, 1.7 Hz, 3H, CH<sub>3</sub>CH).

**(E)-N,N-Diallylbut-2-enamide (1c)**

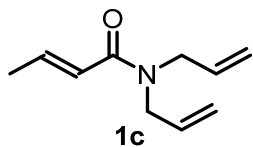

The product **1c** was synthesized following Method 3 and obtained after column chromatography (SiO<sub>2</sub>, pentane:Et<sub>2</sub>O 2:1) as a colorless oil in 85% of yield.

<sup>1</sup>H NMR (CDCl<sub>3</sub>, 400 MHz): δ 6.93 (dq, *J* = 14.9, 6.9 Hz, 1H, CH<sub>3</sub>CH=), 6.16 (dq, *J* = 14.9, 1.7 Hz, 1H, COCH=), 5.78 (ddt, *J* = 17.1, 10.3, 5.3 Hz, 2H, NCH<sub>2</sub>CH=), 5.21-5.10 (m, 4H, CH=CH<sub>2</sub>), 4.01 (d, *J* = 5.7 Hz, 2H, NCH<sub>2</sub>), 3.91 (d, *J* = 4.1 Hz, 2H, NCH<sub>2</sub>), 1.86 (dd, *J* = 6.9, 1.7 Hz, 3H, CHCH<sub>3</sub>).

<sup>13</sup>C NMR (CDCl<sub>3</sub>, 100 MHz): δ 166.7, 142.1, 133.4, 133.1, 121.8, 117.2, 116.7, 49.1, 48.4, 18.3.

HRMS (ESI+, *m/z*): calcd for C<sub>10</sub>H<sub>16</sub>NO [M+H]<sup>+</sup>: 166.12264, found: 166.12242.

**(E)-N,N-Dibenzylbut-2-enamide (1d)**

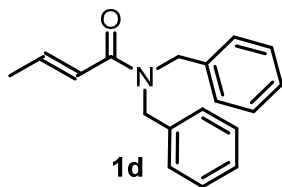

The product **1d** was synthesized following Method 3 and obtained after column chromatography (SiO<sub>2</sub>, pentane:Et<sub>2</sub>O 2:1) as a colorless oil in 85% of yield.

<sup>1</sup>H NMR (CDCl<sub>3</sub>, 400 MHz): δ 7.39-7.17 (m, 10H, CH<sub>Ar</sub>), 7.08 (dq, *J* = 14.9, 6.9 Hz, 1H, CH<sub>3</sub>CH=), 6.30 (dq, *J* = 14.9, 1.6 Hz, 1H, COCH=), 4.64 (s, 2H, NCH<sub>2</sub>), 4.51 (s, 2H, NCH<sub>2</sub>), 1.87 (dd, *J* = 6.9, 1.6 Hz, 3H, CHCH<sub>3</sub>).

<sup>13</sup>C NMR (CDCl<sub>3</sub>, 100 MHz): δ 167.4, 143.1, 137.5, 136.9, 129.0, 128.7, 128.4, 127.7, 127.5, 126.6, 121.7, 49.9, 48.5, 18.4.

HRMS (ESI+, m/Z): calcd for C<sub>18</sub>H<sub>20</sub>NO [M+H]<sup>+</sup>: 266.15394, found: 266.15408.

**(E)-N,N-Bis(4-methoxybenzyl)hex-2-enamide (1e)**

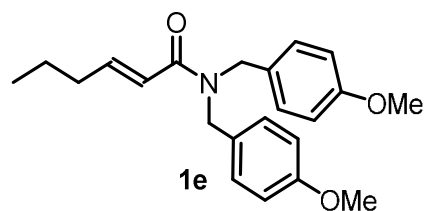

The product **1e** was synthesized following Method 1 and obtained after column chromatography (SiO<sub>2</sub>, pentane:Et<sub>2</sub>O 2:1) as a pale yellow oil in 91% of yield.

<sup>1</sup>H NMR (CDCl<sub>3</sub>, 400 MHz): δ 7.19 (d, *J* = 8.5 Hz, 2H, CH<sub>Ar</sub>), 7.09 (d, *J* = 8.5 Hz, 2H, CH<sub>Ar</sub>), 7.04 (dt, *J* = 15.0, 7.1 Hz, 1H, CH<sub>2</sub>CH=), 6.89 (d, *J* = 8.5 Hz, 2H, CH<sub>Ar</sub>), 6.84 (d, *J* = 8.5 Hz, 2H, CH<sub>Ar</sub>), 6.27 (dt, *J* = 15.0, 1.4 Hz, 1H, COCH=), 4.54 (s, 2H, NCH<sub>2</sub>), 4.42 (s, 2H, NCH<sub>2</sub>), 3.81 (s, 3H, OCH<sub>3</sub>), 3.80 (s, 3H, OCH<sub>3</sub>), 2.16 (qd, *J* = 7.6, 1.5 Hz, 2H, CHCH<sub>2</sub>), 1.46 (sex (qt), *J* = 7.4 Hz, 2H, CH<sub>3</sub>CH<sub>2</sub>), 0.90 (t, *J* = 7.4 Hz, 3H, CH<sub>2</sub>CH<sub>3</sub>).

<sup>13</sup>C NMR (CDCl<sub>3</sub>, 100 MHz): δ 167.2, 159.1, 158.9, 147.6, 129.8, 129.7, 128.7, 127.9, 120.4, 114.3, 113.9, 55.4, 55.3, 49.1, 47.6, 34.6, 21.7, 13.8.

HRMS (ESI+, m/Z): calcd for C<sub>22</sub>H<sub>28</sub>NO<sub>3</sub> [M+H]<sup>+</sup>: 354.20637, found: 354.20663.

**(E)-N-Methyl-N-phenylbut-2-enamide (1f)<sup>6</sup>**

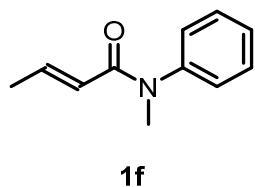

The product **1f** was synthesized following Method 3 and obtained after column chromatography (SiO<sub>2</sub>, pentane:Et<sub>2</sub>O 2:1) as a colorless oil in 24% of yield.

$^1\text{H}$  NMR ( $\text{CDCl}_3$ , 400 MHz):  $\delta$  7.38 (t,  $J = 7.4$  Hz, 2H,  $\text{CH}_{\text{Ar}}$ ), 7.30 (t,  $J = 7.4$  Hz, 1H,  $\text{CH}_{\text{Ar}}$ ), 7.15 (d,  $J = 7.4$  Hz, 2H,  $\text{CH}_{\text{Ar}}$ ), 6.90 (dq,  $J = 15.1, 6.9$  Hz, 1H,  $\text{CH}_3\text{CH}=\text{C}$ ), 5.73 (d,  $J = 15.1$  Hz, 1H,  $\text{COCH}=\text{C}$ ), 3.30 (s, 3H,  $\text{NCH}_3$ ), 1.70 (dd,  $J = 6.9, 1.5$  Hz, 3H,  $\text{CHCH}_3$ ).

**(E)-N-Methyl-N-tosylbut-2-enamide (1g)**<sup>3</sup>

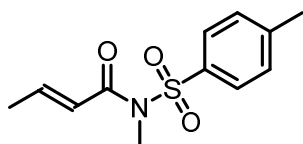

**1g**

The product **1g** was synthesized following Method 4 and obtained as a colorless oil in 97% of yield.

$^1\text{H}$  NMR ( $\text{CDCl}_3$ , 400 MHz):  $\delta$  7.74 (d,  $J = 8.0$  Hz, 2H,  $\text{CH}_{\text{Ar}}$ ), 7.33 (d,  $J = 8.0$  Hz, 2H,  $\text{CH}_{\text{Ar}}$ ), 6.96 (dq,  $J = 15.0, 6.8$  Hz, 1H,  $\text{CH}_3\text{CH}=\text{C}$ ), 6.80 (dd,  $J = 15.0, 1.5$  Hz, 1H,  $\text{COCH}=\text{C}$ ), 3.27 (s, 3H,  $\text{NCH}_3$ ), 2.43 (s, 3H,  $\text{PhCH}_3$ ), 1.90 (dd,  $J = 6.8, 1.5$  Hz, 3H,  $\text{CHCH}_3$ ).

**(E)-N-Methyl-N-methoxybut-2-enamide (1h)**<sup>7</sup>

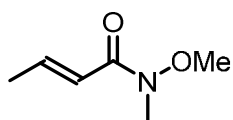

**1h**

The product **1h** was synthesized following Method 3 and obtained after column chromatography (pentane:Et<sub>2</sub>O 1:1) as a colorless oil in 70% of yield. *Note: In this case N-methoxy-methylamine hydrochloride (8 mmol) and dry triethylamine (10 mmol) were used.*

$^1\text{H}$  NMR ( $\text{CDCl}_3$ , 400 MHz):  $\delta$  6.98 (dq,  $J = 15.4, 6.9$  Hz, 1H,  $\text{CH}_3\text{CH}=\text{C}$ ), 6.42 (dq,  $J = 15.4, 1.7$  Hz, 1H,  $\text{COCH}=\text{C}$ ), 3.70 (s, 3H,  $\text{OCH}_3$ ), 3.23 (s, 3H,  $\text{NCH}_3$ ), 1.91 (dd,  $J = 6.9, 1.7$  Hz, 3H,  $\text{CHCH}_3$ ).

**(E)-1-(4-Morpholinyl)-2-buten-1-one (1i)**<sup>8</sup>

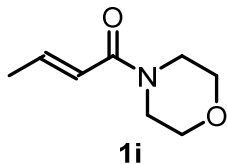

The product **1i** was synthesized following Method 3 and obtained after column chromatography (SiO<sub>2</sub>, Et<sub>2</sub>O) as a colorless oil in 92% of yield.

<sup>1</sup>H NMR (CDCl<sub>3</sub>, 400 MHz): δ 6.82 (dq, *J* = 15.0, 6.9 Hz, 1H, CH<sub>3</sub>CH=), 6.16 (dq, *J* = 15.0, 1.7 Hz, 1H, COCH=), 3.61-3.50 (m, 8H, CH<sub>2</sub>), 1.81 (dd, *J* = 6.9, 1.7 Hz, 3H, CHCH<sub>3</sub>).

<sup>13</sup>C NMR (CDCl<sub>3</sub>, 100 MHz): δ 165.6, 142.1, 121.0, 66.8, 46.1, 42.2, 18.2.

HRMS (ESI+, *m/z*): calcd for C<sub>8</sub>H<sub>14</sub>NO<sub>2</sub> [M+H]<sup>+</sup>: 156.10191, found: 156.10190.

**5,6-Dihydro-1-methyl-2(1H)-pyridinone (1j)**<sup>9</sup>

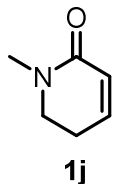

The product **1j** was synthesized following Method 5 and obtained as a colorless oil in 58% of total yield.

<sup>1</sup>H NMR (CDCl<sub>3</sub>, 400 MHz): δ 6.48 (dt, *J* = 9.7, 4.2 Hz, 1H, CH<sub>2</sub>CH=), 5.86 (dt, *J* = 9.7, 1.9 Hz, 1H, COCH=), 3.36 (t, *J* = 7.2 Hz, 2H, NCH<sub>2</sub>), 2.93 (s, 3H, NCH<sub>3</sub>), 2.34 (tdd, *J* = 7.2, 4.2, 1.9 Hz, 2H, CH<sub>2</sub>CH=).

**(E)-N,N-Diallyl-hex-2-enamide (1k)**

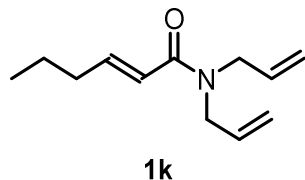

The product **1k** was synthesized following Method 1 and obtained as a colorless oil in 63% of yield.

$^1\text{H}$  NMR ( $\text{CDCl}_3$ , 400 MHz):  $\delta$  6.93 (dt,  $J = 15.1, 7.0$  Hz, 1H,  $\text{CH}=\text{CH}$ ), 6.14 (dd,  $J = 15.1, 1.5$  Hz, 1H,  $\text{CH}=\text{CH}$ ), 5.84-5.74 (m, 2H, 2  $\text{CH}=\text{CH}_2$ ), 5.22-5.11 (m, 4H, 2 $\text{CH}=\text{CH}_2$ ), 4.02 (d,  $J = 5.3$  Hz, 2H,  $\text{CH}_2\text{CH}$ ), 3.92 (d,  $J = 4.6$  Hz, 2H,  $\text{CH}_2\text{CH}$ ), 2.17 (qd,  $J = 7.3, 1.5$  Hz, 2H,  $\text{CH}_2\text{CH}_2$ ), 1.47 (dq,  $J = 14.7, 7.3$  Hz, 2H,  $\text{CH}_2\text{CH}_3$ ), 0.92 (t,  $J = 7.3$  Hz, 3H,  $\text{CH}_2\text{CH}_3$ ).

$^{13}\text{C}$  NMR ( $\text{CDCl}_3$ , 100 MHz):  $\delta$  166.9, 147.1, 133.5, 133.2, 120.4, 117.4, 116.8, 49.2, 48.5, 34.7, 21.7, 13.8.

HRMS (ESI+,  $m/z$ ): calcd for  $\text{C}_{12}\text{H}_{20}\text{NO}$   $[\text{M}+\text{H}]^+$ : 194.15394, found: 194.15402.

**(E)-N,N-Dimethyl-3-cyclohexyl-prop-2-enamide (1l)<sup>10</sup>**

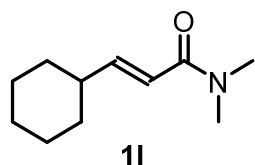

The product **1l** was synthesized following Method 6 and obtained as a colorless liquid after column chromatography ( $\text{SiO}_2$ ,  $\text{Et}_2\text{O}$ ) in 14% yield.

$^1\text{H}$  NMR ( $\text{CDCl}_3$ , 400 MHz):  $\delta$  6.82 (dd,  $J = 15.2, 7.0$  Hz, 1H,  $\text{CH}=\text{CH}$ ), 6.17 (dd,  $J = 15.2, 1.2$  Hz, 1H,  $\text{CH}=\text{CH}$ ), 3.06 (s, 3H,  $\text{NCH}_3$ ), 2.99 (s, 3H,  $\text{NCH}_3$ ), 2.16-2.08 (m, 1H,  $\text{CH}$ ), 1.76-1.64 (m, 5H,  $\text{CH}_2$ ), 1.09 (m, 5H,  $\text{CH}_2$ ).

HRMS (ESI+, m/Z): calcd for C<sub>11</sub>H<sub>20</sub>NO [M+H]<sup>+</sup>: 182.15394, found: 182.15371.

**(E)-N,N-Dimethyl-3-phenyl-prop-2-enamide (1m)**<sup>11</sup>

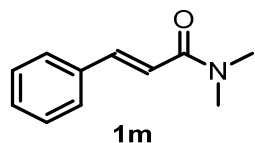

The product **1m** was synthesized following Method 1 and obtained as a white powder in 82 % yield.

<sup>1</sup>H NMR (CDCl<sub>3</sub>, 400 MHz): δ 7.67 (d, *J* = 15.4 Hz, 1H, CH=CH), 7.54-7.52 (m, 2H, CH<sub>Ar</sub>), 7.39-7.32 (m, 3H, CH<sub>Ar</sub>), 6.89 (d, *J* = 15.4 Hz, 1H, CH=CH), 3.17 (s, 3H, NCH<sub>3</sub>), 3.07 (s, 3H, NCH<sub>3</sub>).

**(E)-N,N-Diallyl-3-phenyl-prop-2-enamide (1n)**

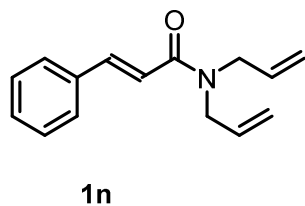

The product **1n** was synthesized following Method 1 and obtained as a colorless oil in 90% of yield.

<sup>1</sup>H NMR (CDCl<sub>3</sub>, 400 MHz): δ 7.72 (d, *J* = 15.4 Hz, 1H, CH=CH), 7.50-7.48 (m, 2H, CH<sub>Ar</sub>), 7.37-7.30 (m, 3H, CH<sub>Ar</sub>), 6.78 (d, *J* = 15.4 Hz, 1H, CH=CH), 5.89-5.78 (m, 2H, 2CH=CH<sub>2</sub>), 5.25-5.15 (m, 4H, 2CH=CH<sub>2</sub>), 4.09 (d, *J* = 5.8 Hz, 2H, CH<sub>2</sub>CH), 4.02 (d, *J* = 4.1 Hz, 2H, CH<sub>2</sub>CH).

<sup>13</sup>C NMR (CDCl<sub>3</sub>, 100 MHz): δ 166.7, 143.0, 135.4, 133.3, 133.3, 129.6, 128.8, 127.9, 117.7, 117.5, 116.9, 49.3, 48.8.

HRMS (ESI+, m/Z): calcd for C<sub>15</sub>H<sub>18</sub>NO [M+H]<sup>+</sup>: 228.13838, found: 228.13829.

**(E)-N,N-Dimethyl-3-(4-(trifluoromethyl)phenyl)prop-2-enamide (1o)**<sup>12</sup>

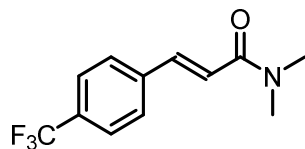

**1o**

The product **1o** was synthesized following Method 1 and obtained as a white solid in 87% of yield.

<sup>1</sup>H NMR (CDCl<sub>3</sub>, 400 MHz): δ 7.67 (d, *J* = 15.4 Hz, 1H, CH=CH), 7.62 (s, 4H, CH<sub>Ar</sub>), 6.96 (d, *J* = 15.5 Hz, 1H, CH=CH), 3.19 (s, 3H, NCH<sub>3</sub>), 3.09 (s, 3H, NCH<sub>3</sub>).

**(E)-N,N-Diallyl-3-(4-(trifluoromethyl)phenyl)prop-2-enamide (1p)**

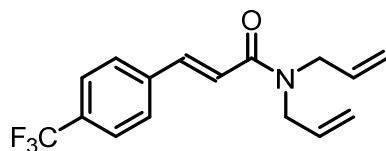

**1p**

The product **1p** was synthesized following Method 1 and obtained as a colorless oil in 69% of yield.

<sup>1</sup>H NMR (CDCl<sub>3</sub>, 400 MHz): δ 7.73 (d, *J* = 15.4 Hz, 1H, CH=CH), 7.61 (d, *J* = 8.6 Hz, 2H, CH<sub>Ar</sub>), 7.59 (d, *J* = 8.6 Hz, 2H, CH<sub>Ar</sub>), 6.84 (d, *J* = 15.4 Hz, 1H, CH=CH), 5.91-5.78 (m, 2H, 2CH=CH<sub>2</sub>), 5.29-5.17 (m, 4H, 2CH=CH<sub>2</sub>), 4.11 (d, *J* = 6.1 Hz, 2H, CH<sub>2</sub>CH), 4.04 (d, *J* = 4.7 Hz, 2H, CH<sub>2</sub>CH).

<sup>13</sup>C NMR (CDCl<sub>3</sub>, 100 MHz): δ 166.2, 141.3, 138.9 (q, *J* = 1.3 Hz), 133.2, 1<sup>31</sup>.3 (q, *J* = 32.7 Hz), 128.1, 125.9 (q, *J* = 3.8 Hz), 124.0 (q, *J* = 272.3 Hz), 120.3, 117.8, 117.1, 49.4, 49.0.

HRMS (ESI+, *m/z*): calcd for C<sub>16</sub>H<sub>17</sub>F<sub>3</sub>NO [M+H]<sup>+</sup>: 296.12568, found: 296.12584.



**(E)-N,N-Dimethyl-3-(4-methoxyphenyl)-prop-2-enamide (1q)**<sup>4,5</sup>

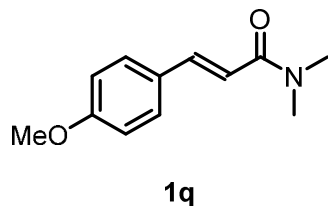

The product **1q** was synthesized following Method 1 and obtained as a white solid in 79% of yield.

<sup>1</sup>H NMR (CDCl<sub>3</sub>, 400 MHz): δ 7.63 (d, *J* = 15.4 Hz, 1H, CH=CH), 7.48 (d, *J* = 8.7 Hz, 2H, CH<sub>Ar</sub>), 6.89 (d, *J* = 8.7 Hz, 2H, CH<sub>Ar</sub>), 6.76 (d, *J* = 15.4 Hz, 1H, CH=CH), 3.83 (s, 3H, OCH<sub>3</sub>), 3.16 (s, 3H, NCH<sub>3</sub>), 3.06 (s, 3H, NCH<sub>3</sub>).

**(E)-N,N-Dimethyl-3-(3-bromophenyl)-prop-2-enamide (1r)**<sup>13</sup>

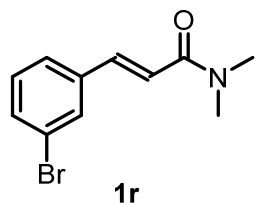

The product **1r** was synthesized following Method 1 and obtained as a white solid in 79% of yield.

<sup>1</sup>H NMR (CDCl<sub>3</sub>, 400 MHz): δ 7.67 (t, *J* = 1.5 Hz, 1H, CH<sub>Ar</sub>), 7.58 (d, *J* = 15.5 Hz, 1H, CH=CH), 7.47 (d, *J* = 7.8 Hz, 1H, CH<sub>Ar</sub>), 7.42 (d, *J* = 7.8 Hz, 1H, CH<sub>Ar</sub>), 7.23 (d, *J* = 7.8 Hz, 1H, CH<sub>Ar</sub>), 6.88 (d, *J* = 15.5 Hz, 1H, CH=CH), 3.18 (s, 3H, NCH<sub>3</sub>), 3.08 (s, 3H, NCH<sub>3</sub>).

<sup>13</sup>C NMR (CDCl<sub>3</sub>, 100 MHz): δ 166.3, 140.8, 137.6, 132.4, 130.4, 130.2, 126.8, 123.0, 119.0, 37.5, 36.1.

HRMS (ESI+, *m/z*): calcd for C<sub>11</sub>H<sub>13</sub>BrNO [M+H]<sup>+</sup>: 254.01750, found: 254.01757.

**(E)-N,N-Dimethyl-3-(thiophen-2-yl)-prop-2-enamide (1s)**<sup>4,5</sup>

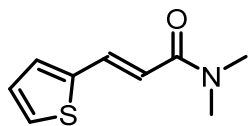

**1s**

The product **1s** was synthesized following Method 1 and obtained as a brown solid in 77% of yield.

<sup>1</sup>H NMR (CDCl<sub>3</sub>, 400 MHz): δ 7.79 (d, *J* = 15.1 Hz, 1H, CH=CH), 7.31 (d, *J* = 5.1 Hz, 1H, CH<sub>Ar</sub>), 7.21 (d, *J* = 3.6 Hz, 1H, CH<sub>Ar</sub>), 7.03 (dd, *J* = 5.1, 3.6 Hz, 1H, CH<sub>Ar</sub>), 6.69 (d, *J* = 15.1 Hz, 1H, CH=CH), 3.14 (s, 3H, NCH<sub>3</sub>), 3.07 (s, 3H, NCH<sub>3</sub>).

**(E)-N,N-Diallyl-3-(thiophen-2-yl)-prop-2-enamide (1t)**

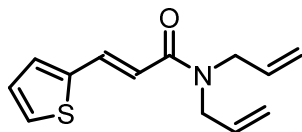

**1t**

The product **1t** was synthesized following Method 1 and obtained as a colorless oil in 88% of yield.

<sup>1</sup>H NMR (CDCl<sub>3</sub>, 400 MHz): δ 7.83 (d, *J* = 15.1 Hz, 1H, CH=CH), 7.31 (d, *J* = 5.0 Hz, 1H, CH<sub>Ar</sub>), 7.21 (d, *J* = 3.5 Hz, 1H, CH<sub>Ar</sub>), 7.03 (dd, *J* = 5.0, 3.5 Hz, 1H, CH<sub>Ar</sub>), 6.58 (d, *J* = 15.1 Hz, 1H, CH=CH), 5.90-5.78 (m, 2H, 2 CH=CH<sub>2</sub>), 5.27-5.15 (m, 4H, 2 CH=CH<sub>2</sub>), 4.09 (d, *J* = 5.9 Hz, 2H, CH<sub>2</sub>CH), 4.00 (d, *J* = 3.8 Hz, 2H, CH<sub>2</sub>CH).

<sup>13</sup>C NMR (CDCl<sub>3</sub>, 100 MHz): δ 166.4, 140.6, 135.8, 133.4, 133.3, 130.3, 128.1, 127.3, 117.5, 117.0, 116.5, 49.4, 48.9.

HRMS (ESI+, *m/z*): calcd for C<sub>13</sub>H<sub>16</sub>NOS [M+H]<sup>+</sup>: 234.09471, found: 234.09476.

**(E)-N,N-Dimethyl-3-(thiophen-3-yl)-prop-2-enamide (1u)**

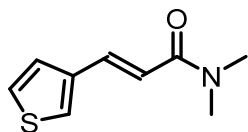

**1u**

The product **1u** was synthesized following Method 1 and obtained as a brown solid in 72% of yield.

$^1\text{H}$  NMR ( $\text{CDCl}_3$ , 400 MHz):  $\delta$  7.66 (d,  $J = 15.4$  Hz, 1H,  $\text{CH}=\text{CH}$ ), 7.45 (dd,  $J = 2.8, 1.2$  Hz, 1H,  $\text{CH}_{\text{Ar}}$ ), 7.32 (dd,  $J = 5.1, 2.8$  Hz, 1H,  $\text{CH}_{\text{Ar}}$ ), 7.30 (dd,  $J = 5.1, 1.2$  Hz, 1H,  $\text{CH}_{\text{Ar}}$ ), 6.72 (d,  $J = 15.4$  Hz, 1H,  $\text{CH}=\text{CH}$ ), 3.13 (s, 3H,  $\text{NCH}_3$ ), 3.08 (s, 3H,  $\text{NCH}_3$ ).

$^{13}\text{C}$  NMR ( $\text{CDCl}_3$ , 100 MHz):  $\delta$  166.9, 138.4, 136.1, 126.9, 126.7, 125.2, 117.1, 37.4, 36.1.

HRMS (ESI+,  $m/z$ ): calcd for  $\text{C}_9\text{H}_{12}\text{NOS}$   $[\text{M}+\text{H}]^+$ : 182.06341, found: 182.06333.

**(E)-N,N-Dimethyl-3-(3-pyridinyl)-prop-2-enamide (1v)<sup>14</sup>**

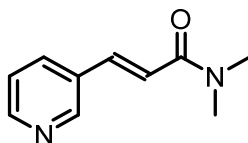

**1v**

The product **1v** was synthesized following Method 1 and obtained after column ( $\text{SiO}_2$ , EtOAc) as a white solid in 69% of yield. *Note: In this case the reaction was quenched with saturated  $\text{Na}_2\text{CO}_3$  solution and the aqueous layer was extracted with DCM. The organic layer was dried ( $\text{MgSO}_4$ ), filtered and concentrated under reduced pressure.*

$^1\text{H}$  NMR ( $\text{CDCl}_3$ , 400 MHz):  $\delta$  8.70 (d,  $J = 1.9$  Hz, 1H,  $\text{CH}_{\text{Ar}}$ ), 8.51 (dd,  $J = 4.7, 1.4$  Hz, 1H,  $\text{CH}_{\text{Ar}}$ ), 7.77 (dt,  $J = 7.9, 1.9$  Hz, 1H,  $\text{CH}_{\text{Ar}}$ ), 7.59 (d,  $J = 15.5, 1.2$  Hz, 1H,  $\text{PyCH}$ ), 7.25 (dd,  $J = 7.9, 4.7$  Hz, 1H,  $\text{CH}_{\text{Ar}}$ ), 6.92 (d,  $J = 15.5$  Hz, 1H,  $\text{COCH}$ ), 3.13 (s, 3H,  $\text{NCH}_3$ ), 3.02 (s, 3H,  $\text{NCH}_3$ ).

**(E)-N,N-Dimethyl-6-bromo-hex-2-enamide (1w)**

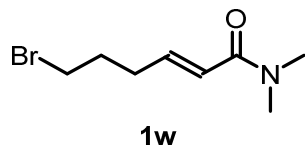

The product **1w** was synthesized following Method 6 and obtained as a colorless oil.

*Note: In this case after purification by column chromatography (SiO<sub>2</sub>, EtOAc) a mixture of 90% title amide and 10% chloro-substituted amide was obtained. The mixture (1.5 mmol) was dissolved in CH<sub>2</sub>Br<sub>2</sub> (10 mL) and added to a stirred solution of tetraethylammonium bromide (3.15 g, 15 mmol) in CH<sub>2</sub>Br<sub>2</sub> (20 mL). The flask was fitted with a condenser and heated at 80 °C under nitrogen for 16 h. The reaction mixture was condensed under reduced pressure and Et<sub>2</sub>O was added. The mixture was filtered and the filtrate was condensed under reduced pressure. The residue was purified by column chromatography on silica gel (SiO<sub>2</sub>, EtOAc) to afford the title amide (21% yield) as a colorless oil.*

<sup>1</sup>H NMR (CDCl<sub>3</sub>, 400 MHz): δ 6.81 (dt, *J* = 15.0, 7.2 Hz, 1H, CH<sub>2</sub>CH=), 6.32 (dt, *J* = 15.0, 1.4 Hz, 1H, COCH=), 3.42 (t, *J* = 6.5 Hz, 2H, BrCH<sub>2</sub>), 3.08 (s, 3H, NCH<sub>3</sub>), 3.00 (s, 3H, NCH<sub>3</sub>), 2.38 (qd, *J* = 7.2, 1.5 Hz, 2H, CH<sub>2</sub>CH=), 2.01 (quint, *J* = 6.6 Hz, 2H, BrCH<sub>2</sub>CH<sub>2</sub>).

<sup>13</sup>C NMR (CDCl<sub>3</sub>, 100 MHz): δ 166.5, 143.5, 121.7, 37.3, 35.7, 32.9, 31.0, 30.6.

HRMS (ESI+, *m/z*): calcd for C<sub>8</sub>H<sub>15</sub>BrNO [M+H]<sup>+</sup>: 220.03315, found: 220.03144

**(E)-N,N-Dimethyl-6-hydroxy-hex-2-enamide (1x)**

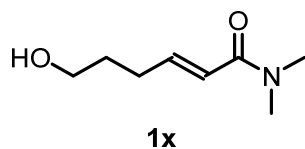

The product **1x** was synthesized following Method 6 and obtained after column chromatography (SiO<sub>2</sub>, Et<sub>2</sub>O:MeOH 20:1) as a colorless oil 15% of yield.

$^1\text{H}$  NMR ( $\text{CDCl}_3$ , 400 MHz):  $\delta$  6.87 (dt,  $J = 15.1, 7.0$  Hz, 1H,  $\text{CH}_2\text{CH}=\text{C}$ ), 6.28 (dt,  $J = 15.1, 1.5$  Hz, 1H,  $\text{COCH}=\text{C}$ ), 3.67 (t,  $J = 6.4$  Hz, 2H,  $\text{OHCH}_2$ ), 3.07 (s, 3H,  $\text{NCH}_3$ ), 2.99 (s, 3H,  $\text{NCH}_3$ ), 2.31 (qd,  $J = 7.2, 1.5$  Hz, 2H,  $\text{CH}_2\text{CH}=\text{C}$ ), 1.73 (quint,  $J = 6.6$  Hz, 2H,  $\text{OHCH}_2\text{CH}_2$ ).

$^{13}\text{C}$  NMR ( $\text{CDCl}_3$ , 100 MHz):  $\delta$  167.0, 145.8, 120.4, 61.5, 37.4, 35.7, 31.2, 28.8.

HRMS (ESI+,  $m/z$ ): calcd for  $\text{C}_8\text{H}_{16}\text{NO}_2$  [ $\text{M}+\text{H}$ ] $^+$ : 158.11756, found: 158.11764.

**(*E*)-*N,N*-Bis(4-methoxybenzyl)hex-2-enamide (1y)**

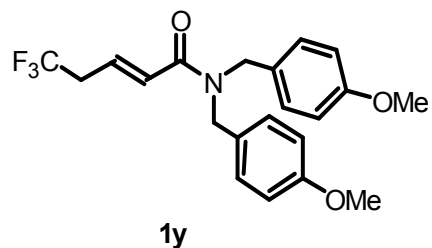

Amide **1y** was synthesized from the corresponding carboxylic acid: (*E*)-5,5,5-trifluoropent-2-enoic acid, which was not commercially available and it was prepared by cross metathesis: Allyl trifluoromethane (437 mg, 3.97 mmol) was condensed at 0 °C in a pressure proof flask and dissolved in toluene (2.5 mL). Then, Hoveyda-Grubbs II catalyst (50 mg, 0.079 mmol) and acrylic acid (545  $\mu\text{L}$ , 4.94 mmol) were added, pressure tube was carefully closed and warmed up to 80 °C while stirring overnight. Then, flask was cooled down to room temperature and carefully opened, and solvent was evaporated in vacuo. The crude mixture was purified by column chromatography on silica gel ( $\text{SiO}_2$ , pentane: $\text{Et}_2\text{O}$  10:1) to afford the acid (257 mg, 42% yield) as a yellowish oil and it was fully characterized:

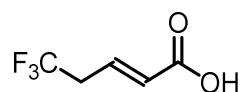

$^1\text{H}$  NMR ( $\text{CDCl}_3$ , 400 MHz):  $\delta$  6.94 (dt,  $J = 15.6, 7.2$  Hz, 1H,  $\text{CH}=\text{CHCH}_2$ ), 6.07 (d,  $J = 15.8$  Hz, 1H,  $\text{CH}=\text{CHCH}_2$ ), 3.04 (qdd,  $J = 10.3, 7.3, 1.3$  Hz, 2H,  $\text{CH}_2$ ).

$^{19}\text{F}$  NMR ( $\text{CDCl}_3$ , 377 MHz):  $\delta$  -65.4 (t,  $J = 10.3$  Hz).

$^{13}\text{C}$  NMR ( $\text{CDCl}_3$ , 101 MHz):  $\delta$  170.7, 137.9 (q,  $J = 3.6$  Hz), 127.0, 125.1 (q,  $J = 276.9$  Hz), 36.9 (q,  $J = 30.8$  Hz).

HRMS (ESI+,  $m/z$ ): calcd for  $\text{C}_5\text{H}_4\text{F}_3\text{O}_2$  [ $\text{M}-\text{H}$ ] $^-$ : 153.01689, found: 153.01712.

Then, the product **1y** was synthesized following Method 1 and obtained after column chromatography (SiO<sub>2</sub>, pentane:Et<sub>2</sub>O 2:1) as a pale yellow oil in 16 % of yield.

<sup>1</sup>H NMR (CDCl<sub>3</sub>, 400 MHz): δ 7.19 (d, *J* = 8.3 Hz, 2H, CH<sub>Ar</sub>), 7.07 (d, *J* = 8.4 Hz, 2H, CH<sub>Ar</sub>), 6.91-6.84 (m, 5H, CH<sub>Ar</sub>, CH<sub>2</sub>CH=), 6.50 (dt, *J* = 15.2 Hz, 1H, COCH=), 4.55 (s, 2H, NCH<sub>2</sub>), 4.42 (s, 2H, NCH<sub>2</sub>), 3.82 (s, 3H, OCH<sub>3</sub>), 3.80 (s, 3H, OCH<sub>3</sub>), 3.02-2.92 (m, 1H, CH<sub>2</sub>).

<sup>19</sup>F NMR (CDCl<sub>3</sub>, 377 MHz): δ -65.5 (t, *J* = 10.5 Hz).

<sup>13</sup>C NMR (CDCl<sub>3</sub>, 100 MHz): δ 165.8, 159.4, 159.2, 133.3 (q, *J* = 3.5 Hz), 130.0, 129.2, 128.2, 127.9, 127.2, 125.4 (q, *J* = 276.8 Hz), 114.5, 114.1, 55.44, 55.39, 49.3, 47.9, 37.1 (q, *J* = 30.4 Hz).

HRMS (ESI+, *m/z*): calcd for C<sub>21</sub>H<sub>23</sub>F<sub>3</sub>NO<sub>3</sub> [M+H]<sup>+</sup>: 394.16245, found: 394.16197.

## 8. Cu- asymmetric conjugate addition (ACA) of Grignard reagents to enamides

### General procedure

In a flame-dried Schlenk tube equipped with septum and magnetic stirring bar, CuBr·SMe<sub>2</sub> and ligand (*R,S*<sub>Fe</sub>)-**L1** were dissolved in DCM (final concentration of enamide substrate is 0.1M) and stirred under nitrogen atmosphere for 20 min. The substrate was added at once. After stirring for 5 min. at RT the reaction mixture was cooled down (see the details per substrate), followed by addition of LA. After 20 min., RMgBr was added by hand in about 1 min. After stirring for 18 h, the reaction was quenched with MeOH followed by addition of saturated aqueous NH<sub>4</sub>Cl solution and warming up to RT. The reaction mixture was extracted with DCM (10 mL × 3). Combined organic phases were dried over MgSO<sub>4</sub>, filtered and solvents were evaporated on a rotary evaporator. The crude was purified by flash chromatography on silica gel.

*Note 1: The procedures for ACA differ in LA, the reaction temperature and mode of addition. The details are given per product. The reactions were carried out either using 0.1 or 0.2 mmol of an enamide substrate.*

*Note 2: DCM was found to be the most optimal solvent while presence of even traces of THF is detrimental for the reaction conversion and enantioselectivity. On the other hand Cu salts other than CuBr can be used as well as long as the halide in the Grignard reagent used is a bromide (RMgBr)*

*Note 3: Grignard reagents must be used either in Et<sub>2</sub>O or tBuOMe. THF even in a small quantities must be avoided. Copper catalysed conjugate addition of THF solution of iPrMgBr for instance led to racemic product while Et<sub>2</sub>O solution afforded product with 76% ee*

### **Procedure for the preparative (10 g) scale copper ACA using 5 mol% of chiral catalyst and the recovery of the chiral catalyst (L1-CuBr)**

The reaction on a preparative scale (Table S2, entry 23) was carried out for the synthesis of the product **3h** using the general procedure described above. The reaction was carried out using **1a** (10 g, 71 mmol), CuBr·SMe<sub>2</sub> (727.9 mg, 3.54 mmol, 5 mol%), ligand **L1** (2721.2 mg, 4.25 mmol, 6 mol%), TMSOTf (25.6 mL, 141.6 mmol), MeMgBr (141.6 mmol, 3.0 M in Et<sub>2</sub>O), 708 mL of DCM at 0 °C, for a total reaction time of 2h. Product **3h** was obtained as a colorless oil [93% yield, 96% ee] after column chromatography (SiO<sub>2</sub>, pentane:Et<sub>2</sub>O 1:1).

The chiral catalyst was recovered in this reaction in the form of a Cu-complex (**L1-CuBr**). The reaction mixture was loaded on a column with silica. Using a pentane:Et<sub>2</sub>O ratio of 1:1 the **L1-CuBr** eluted first, followed by CA product **3h**. Catalyst **L1-CuBr** was obtained as a yellow-orange solid in 80% of yield and reused for another ACA reaction (Table S2, entry 21) with similar performance.

## General procedure for the synthesis of racemic products

Racemic products were synthesized in a flame-dried Schlenk tube equipped with septum and magnetic stirring bar by mixing the corresponding enamide substrate (0.1 M in DCM) with 2 equiv. of corresponding Grignard reagents and 1.1 equiv. of TMSOTf at  $-10\text{ }^{\circ}\text{C}$  for 2 h. The quenching and isolation procedure is the same as described above.

## Specific experimental details and product characterisation

### **(R)-N,N-Dimethyl-3-ethyl-hexanamide (2a)**

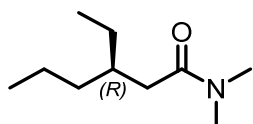

**2a**

The reaction was performed with 0.2 mmol **1a**, CuBr·SMe<sub>2</sub> (2.06 mg, 0.01 mmol, 5 mol%), ligand **L1** (7.68 mg, 0.012 mmol, 6 mol%), BF<sub>3</sub>·Et<sub>2</sub>O (50  $\mu\text{L}$ , 0.4 mmol), EtMgBr (0.4 mmol, 3.0 M in Et<sub>2</sub>O), 2.0 mL of DCM at  $-78\text{ }^{\circ}\text{C}$ . Product **2a** was obtained as a colorless oil after column chromatography (SiO<sub>2</sub>, pentane:Et<sub>2</sub>O 1:1) [73% yield, 97% ee]. *Note: When the reaction was carried out at  $0\text{ }^{\circ}\text{C}$  using 10mol% of the catalyst and 2 equiv. of TMSOTf the product **2a** was obtained in 92% yield and 93% ee (Table S2, entry 19).*

<sup>1</sup>H NMR (CDCl<sub>3</sub>, 400 MHz):  $\delta$  3.00 (s, 3H, NCH<sub>3</sub>), 2.93 (s, 3H, NCH<sub>3</sub>), 2.21 (dd,  $J = 15.1, 7.1$  Hz, 1H, CHHCO), 2.20 (dd,  $J = 15.1, 6.7$  Hz, 1H, CHHCO), 1.91-1.81 (m, 1H, CHCH<sub>2</sub>), 1.36-1.21 (m, 5H, CH<sub>2</sub>CH<sub>3</sub>, CH<sub>2</sub>CH<sub>2</sub>CH<sub>3</sub>), 1.24-1.18 (m, 1H, CHHCH<sub>3</sub>), 0.87 (d,  $J = 7.0$  Hz, 3H, CH<sub>3</sub>CH), 0.85 (t,  $J = 7.5$  Hz, 3H, CH<sub>3</sub>CH<sub>2</sub>).

<sup>13</sup>C NMR (CDCl<sub>3</sub>, 100 MHz):  $\delta$  173.1, 37.8, 37.6, 36.1, 35.9, 35.5, 26.4, 19.9, 14.5, 11.0.

HRMS (ESI+, m/Z): calcd for C<sub>10</sub>H<sub>22</sub>NO [M+H]<sup>+</sup>: 172.16959, found: 172.16962.



HPLC: Chiracel-OBH, *n*-heptane/*i*-PrOH 95:5, 0.5 mL/min, 40 °C, detection at 210 nm. Retention time (min): 10.4 (minor) and 11.5 (major).

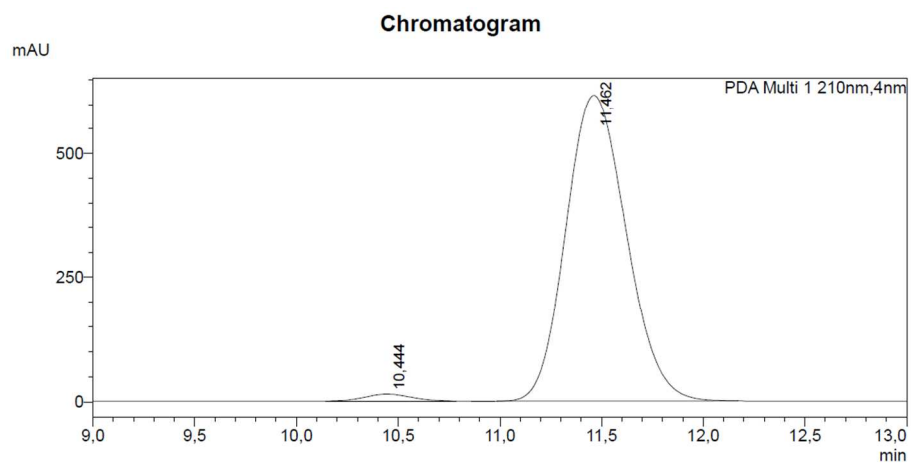

**Peak Table**

| PDA Ch1 210nm |           |          |        |        |
|---------------|-----------|----------|--------|--------|
| Peak#         | Ret. Time | Area     | Height | Conc.  |
| 1             | 10,444    | 217265   | 13911  | 1,680  |
| 2             | 11,462    | 12717057 | 616670 | 98,320 |
| Total         |           | 12934322 | 630581 |        |

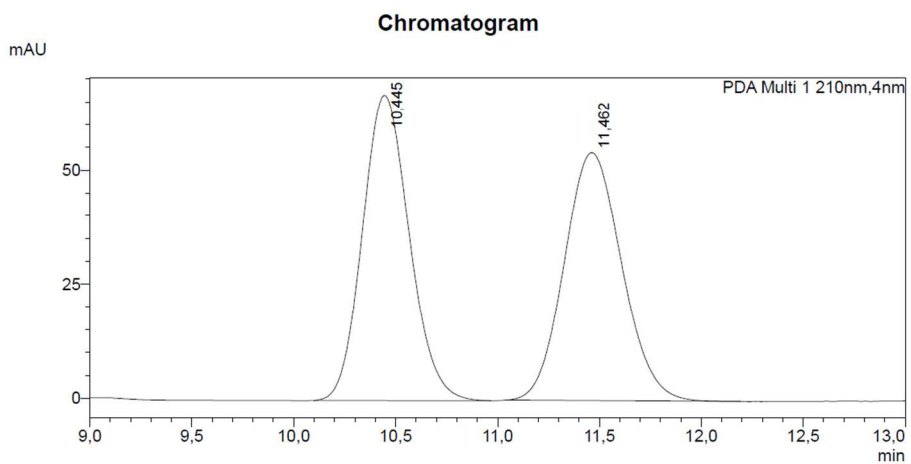

**Peak Table**

| PDA Ch1 210nm |           |         |        |        |
|---------------|-----------|---------|--------|--------|
| Peak#         | Ret. Time | Area    | Height | Conc.  |
| 1             | 10,445    | 1068987 | 66946  | 50,040 |
| 2             | 11,462    | 1067275 | 54327  | 49,960 |
| Total         |           | 2136262 | 121273 |        |

**(*S*)-*N,N*-Dimethyl-3-methyl-pentanamide (2b)<sup>1</sup>**

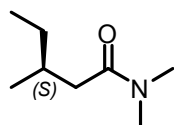

**2b**

The reaction was performed with 0.2 mmol **1b**, CuBrSMe<sub>2</sub> (2.06 mg, 0.01 mmol, 5 mol%), ligand **L1** (7.68 mg, 0.012 mmol, 6 mol%), BF<sub>3</sub>·Et<sub>2</sub>O (50 μL, 0.4 mmol), EtMgBr (0.4 mmol, 3.0 M in Et<sub>2</sub>O), 2.0 mL of DCM at -78 °C. Product **2b** was obtained as a colorless oil after column chromatography (SiO<sub>2</sub>, Et<sub>2</sub>O) [79% yield, 94% *ee*].

<sup>1</sup>H NMR (CDCl<sub>3</sub>, 400 MHz): δ 3.00 (s, 3H, NCH<sub>3</sub>), 2.94 (s, 3H, NCH<sub>3</sub>), 2.30 (dd, *J* = 14.7, 5.9 Hz, 1H, CHHCO), 2.11 (dd, *J* = 14.7, 8.1 Hz, 1H, CHHCO), 1.98-1.86 (m, 1H, CHCH<sub>2</sub>), 1.44-1.34 (m, 1H, CHHCH<sub>3</sub>), 1.24-1.14 (m, 1H, CHHCH<sub>3</sub>), 0.92 (d, *J* = 6.7 Hz, 3H, CH<sub>3</sub>CH), 0.89 (t, *J* = 7.3 Hz, 3H, CH<sub>3</sub>CH<sub>2</sub>).

HPLC: Chiracel-OBH, *n*-heptane/*i*-PrOH 90:10, 0.5 mL/min, 40 °C, detection at 209 nm. Retention time (min): 10.7 (major) and 13.1 (minor).

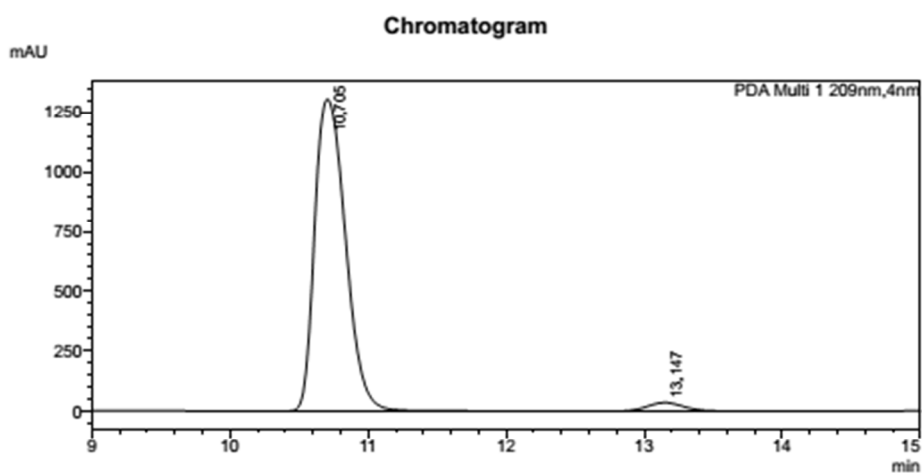

**Peak Table**

| PDA Ch1 209nm |           |          |         |        |
|---------------|-----------|----------|---------|--------|
| Peak#         | Ret. Time | Area     | Height  | Conc.  |
| 1             | 10.705    | 20228294 | 1306007 | 96.933 |
| 2             | 13.147    | 640032   | 34873   | 3.067  |
| Total         |           | 20868325 | 1340880 |        |

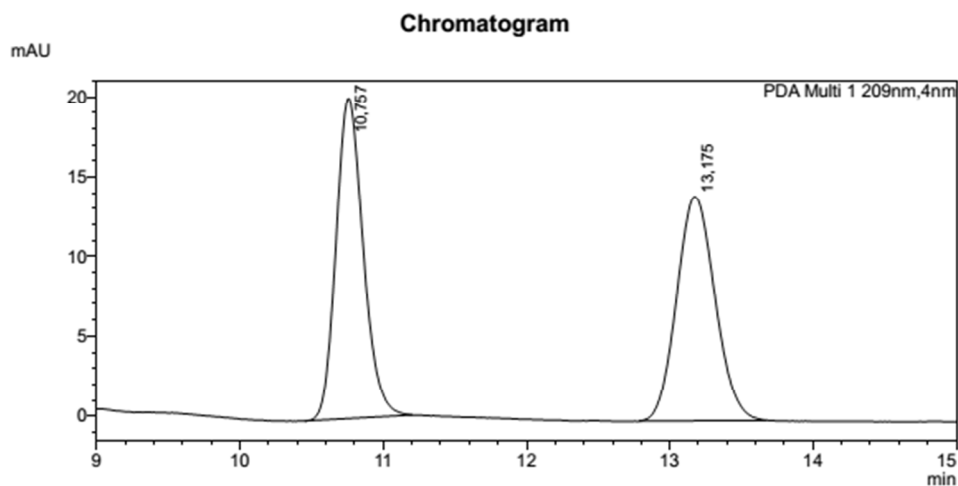

**Peak Table**

| PDA Ch1 209nm |           |        |        |        |
|---------------|-----------|--------|--------|--------|
| Peak#         | Ret. Time | Area   | Height | Conc.  |
| 1             | 10.757    | 264624 | 20024  | 50.278 |
| 2             | 13.175    | 261697 | 14067  | 49.722 |
| Total         |           | 526321 | 34092  |        |

**(S)-N,N-Diallyl-3-methyl-pentanamide (2c)**

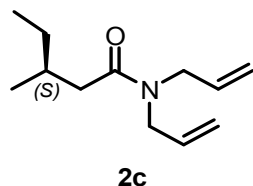

The reaction was performed with 0.2 mmol **1c**, CuBr·SMe<sub>2</sub> (2.06 mg, 0.01 mmol, 5 mol%), ligand **L1** (7.68 mg, 0.012 mmol, 6 mol%), BF<sub>3</sub>·Et<sub>2</sub>O (50 μL, 0.4 mmol), EtMgBr (0.4 mmol, 3.0 M in Et<sub>2</sub>O), 2.0 mL of DCM at -78 °C. Product **2c** was obtained as a colorless oil after column chromatography (SiO<sub>2</sub>, pentane:Et<sub>2</sub>O 5:1) [52% yield, 98% *ee*].

<sup>1</sup>H NMR (CDCl<sub>3</sub>, 400 MHz): δ 5.80-5.70 (m, 2H, CH=CH<sub>2</sub>), 5.20-5.08 (m, 4H, CH=CH<sub>2</sub>), 4.00 (dd, *J* = 15.3, 5.9 Hz, 1H, NCHHCH=CH<sub>2</sub>), 3.96 (dd, *J* = 15.3, 5.9 Hz, 1H, NCHHCH=CH<sub>2</sub>), 3.87 (dt, *J* = 4.8, 1.8 Hz, 2H, NCH<sub>2</sub>CH=CH<sub>2</sub>), 2.28 (dd, *J* = 14.9, 5.9 Hz, 1H, CHHCO), 2.10 (dd, *J* = 14.9, 8.0 Hz, 1H,

CH<sub>2</sub>CO), 2.02-1.90 (m, 1H, CHCH<sub>2</sub>), 1.43-1.33 (m, 1H, CH<sub>3</sub>CHH), 1.22-1.13 (m, 1H, CH<sub>3</sub>CHH), 0.91 (d, *J* = 6.6 Hz, 3H, CH<sub>3</sub>CH), 0.88 (t, *J* = 7.5 Hz, 3H, CH<sub>3</sub>CH<sub>2</sub>).

<sup>13</sup>C NMR (CDCl<sub>3</sub>, 100 MHz): δ 172.8, 133.6, 133.2, 117.1, 116.6, 49.3, 47.9, 40.1, 32.0, 29.7, 19.6, 11.6.

HRMS (ESI+, *m/z*): calcd for C<sub>12</sub>H<sub>22</sub>NO [M+H]<sup>+</sup>: 196.16959, found: 196.16933.

HPLC: Chiracel-ODH, *n*-heptane/*i*-PrOH 99:01, 0.5 mL/min, 40 °C, detection at 211 nm. Retention time (min): 14.9 (minor) and 16.0 (major).

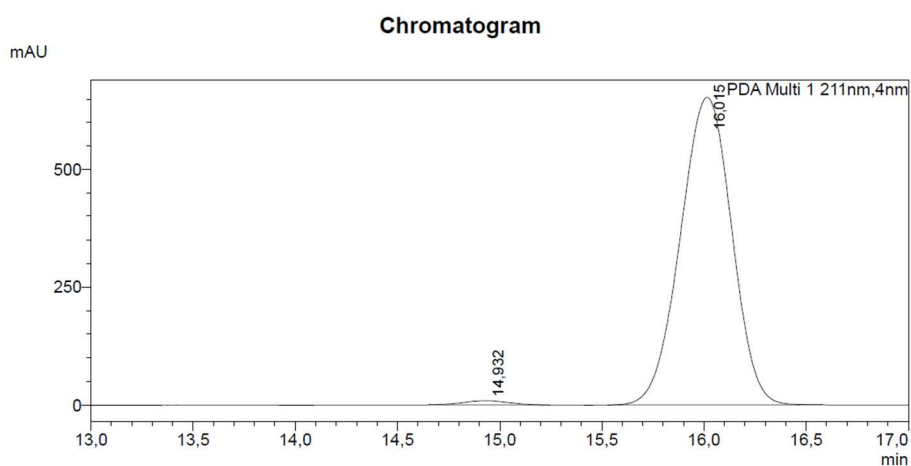

**Peak Table**

| PDA Ch1 211nm |           |          |        |        |
|---------------|-----------|----------|--------|--------|
| Peak#         | Ret. Time | Area     | Height | Conc.  |
| 1             | 14,932    | 136632   | 8764   | 1,185  |
| 2             | 16,015    | 11394875 | 653622 | 98,815 |
| Total         |           | 11531507 | 662385 |        |

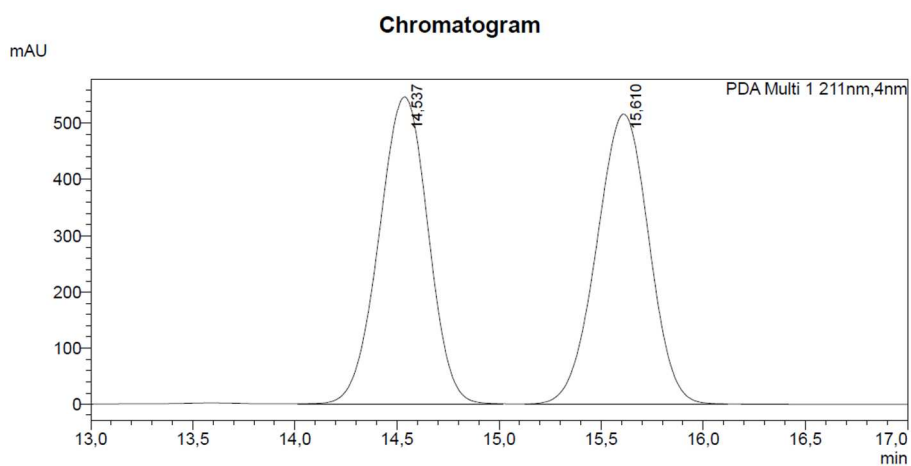

**Peak Table**

| PDA Ch1 211nm |           |          |         |        |
|---------------|-----------|----------|---------|--------|
| Peak#         | Ret. Time | Area     | Height  | Conc.  |
| 1             | 14,537    | 9133797  | 546961  | 49,854 |
| 2             | 15,610    | 9187223  | 514678  | 50,146 |
| Total         |           | 18321020 | 1061639 |        |

**(S)-N,N-Dibenzyl-3-methyl-pentanamide (2d)**

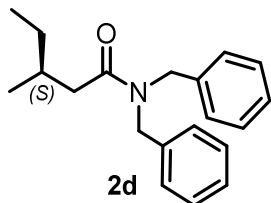

The reaction was performed with 0.2 mmol **1d**, CuBrSMe<sub>2</sub> (2.06 mg, 0.01 mmol, 5 mol%), ligand **L1** (7.68 mg, 0.012 mmol, 6 mol%), BF<sub>3</sub>·Et<sub>2</sub>O (50 μL, 0.4 mmol), EtMgBr (0.4 mmol, 3.0 M in Et<sub>2</sub>O), 2.0 mL of DCM at -78 °C. Product **2d** was obtained as a colorless oil after column chromatography (SiO<sub>2</sub>, pentane:Et<sub>2</sub>O 5:1) [78% yield, 97% *ee*].

<sup>1</sup>H NMR (CDCl<sub>3</sub>, 400 MHz): δ 7.39-7.27 (m, 6H, CH<sub>Ar</sub>), 7.23 (d, *J* = 7.4 Hz, 2H, CH<sub>Ar</sub>), 7.16 (d, *J* = 7.4 Hz, 2H, CH<sub>Ar</sub>), 4.65 (d, *J* = 14.7 Hz, 1H, NCHH), 4.58 (d, *J* = 14.7 Hz, 1H, NCHH), 4.46 (s, 2H, NCH<sub>2</sub>), 2.42 (dd, *J* = 15.0, 5.8 Hz, 1H, CHHCO), 2.24 (dd, *J* = 15.0, 8.0 Hz, 1H, CHHCO), 2.11-2.02 (m, 1H, CH), 1.45-1.40 (m, 1H, CH<sub>3</sub>CHH), 1.24-1.19 (m, 1H, CH<sub>3</sub>CHH), 0.97 (d, *J* = 6.6 Hz, 3H, CH<sub>3</sub>CH), 0.90 (t, *J* = 7.4 Hz, 3H, CH<sub>3</sub>CH<sub>2</sub>).

<sup>13</sup>C NMR (CDCl<sub>3</sub>, 100 MHz): δ 173.3, 137.8, 136.8, 129.0, 128.7, 128.4, 127.7, 127.4, 126.5, 50.0, 48.1, 40.3, 32.2, 29.7, 19.6, 11.6.

HRMS (ESI+, *m/z*): calcd for C<sub>20</sub>H<sub>26</sub>NO [M+H]<sup>+</sup>: 296.20089, found: 296.20084.

HPLC: Chiracel-ODH, *n*-heptane/*i*-PrOH 99.5:0.5, 0.8 mL/min, 40 °C, detection at 218 nm. Retention time (min): 37.4 (minor) and 38.5 (major).

### Chromatogram

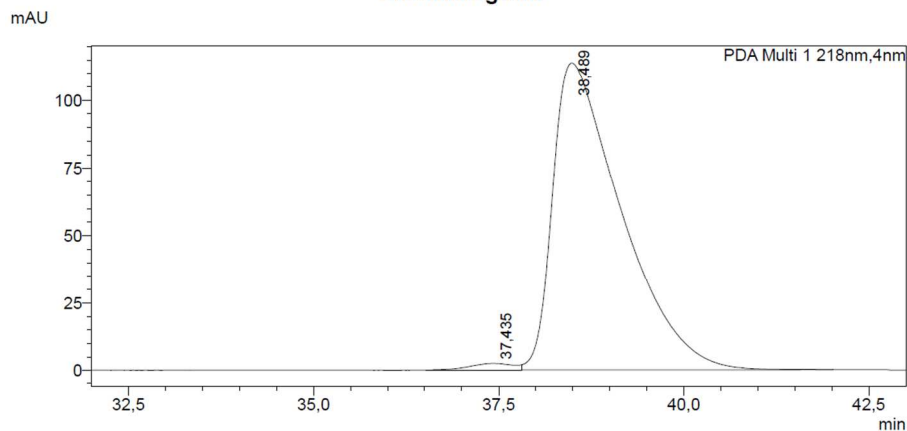

### Peak Table

| PDA Ch1 218nm |           |         |        |        |
|---------------|-----------|---------|--------|--------|
| Peak#         | Ret. Time | Area    | Height | Conc.  |
| 1             | 37,435    | 98705   | 2376   | 1,330  |
| 2             | 38,489    | 7322151 | 113555 | 98,670 |
| Total         |           | 7420856 | 115931 |        |

### Chromatogram

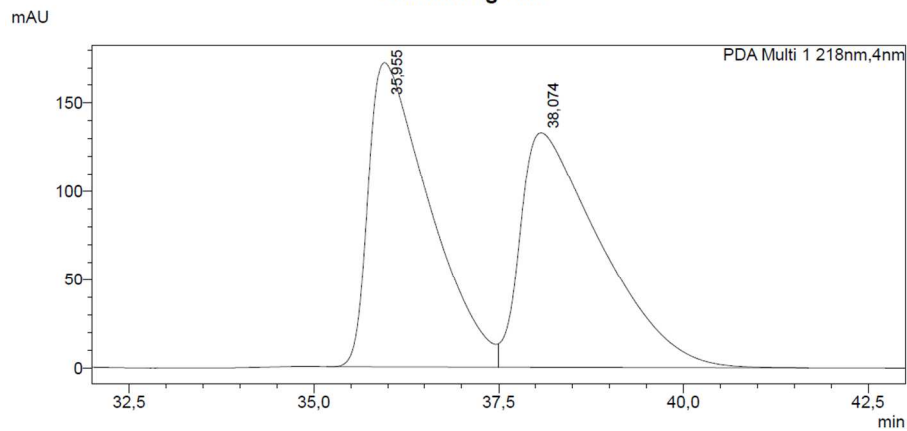

### Peak Table

| PDA Ch1 218nm |           |          |        |        |
|---------------|-----------|----------|--------|--------|
| Peak#         | Ret. Time | Area     | Height | Conc.  |
| 1             | 35,955    | 9924418  | 172365 | 49,575 |
| 2             | 38,074    | 10094393 | 132682 | 50,425 |
| Total         |           | 20018811 | 305048 |        |

**(R)-N,N-Bis(4-methoxybenzyl)-3-ethyl-hexanamide (2e)**

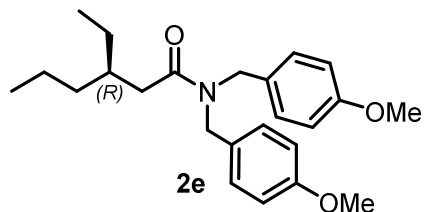

The reaction was performed with 0.1 mmol **1e**, CuBr·SMe<sub>2</sub> (1.03 mg, 0.005 mmol, 5 mol%), ligand **L1** (3.84 mg, 0.006 mmol, 6 mol%), BF<sub>3</sub>·Et<sub>2</sub>O (38 μL, 0.3 mmol), EtMgBr (0.2 mmol, 3.0 M in Et<sub>2</sub>O), 1.0 mL of DCM at -78 °C. Product **2e** was obtained as a colorless oil after column chromatography (SiO<sub>2</sub>, pentane:Et<sub>2</sub>O 4:1) [72% yield, 98% *ee*].

<sup>1</sup>H NMR (CDCl<sub>3</sub>, 400 MHz): δ 7.15 (d, *J* = 8.6 Hz, 2H, CH<sub>Ar</sub>), 7.07 (d, *J* = 8.6 Hz, 2H, CH<sub>Ar</sub>), 6.89 (d, *J* = 8.6 Hz, 2H, CH<sub>Ar</sub>), 6.84 (d, *J* = 8.6 Hz, 2H, CH<sub>Ar</sub>), 4.51 (s, 2H, NCH<sub>2</sub>), 4.37 (s, 2H, NCH<sub>2</sub>), 3.81 (s, 3H, OCH<sub>3</sub>), 3.79 (s, 3H, OCH<sub>3</sub>), 2.33 (dd, *J* = 15.4, 7.1 Hz, 1H, CHHCO), 2.31 (dd, *J* = 15.4, 6.7 Hz, 1H, CHHCO), 2.00-1.97 (m, 1H, CH), 1.40-1.28 (m, 6H, CH<sub>3</sub>CH<sub>2</sub>, CH<sub>3</sub>CH<sub>2</sub>CH<sub>2</sub>), 0.90-0.84 (m, 6H, CH<sub>3</sub>CH<sub>2</sub>).

<sup>13</sup>C NMR (CDCl<sub>3</sub>, 100 MHz): δ 173.3, 159.1, 159.0, 129.9, 129.8, 128.7, 127.8, 114.3, 114.0, 55.4, 55.4, 49.2, 47.2, 37.8, 36.3, 35.8, 26.4, 19.9, 14.5, 11.0.

HRMS (ESI+, *m/z*): calcd for C<sub>24</sub>H<sub>34</sub>NO<sub>3</sub> [M+H]<sup>+</sup>: 384.25332, found: 384.25366.

HPLC: Chiracel-ADH, *n*-heptane/*i*-PrOH 95:5, 0.5 mL/min, 40 °C, detection at 227 nm. Retention time (min): 32.5 (major) and 35.5 (minor).

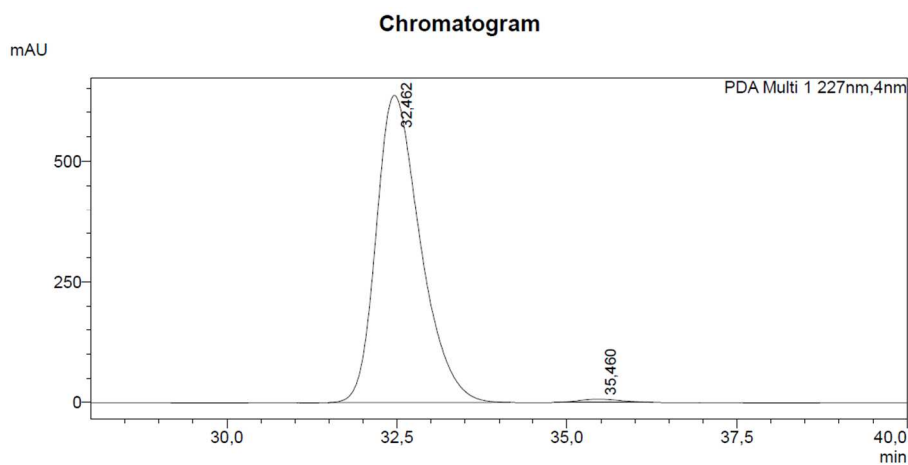

**Peak Table**

| PDA Ch1 227nm |           |          |        |        |
|---------------|-----------|----------|--------|--------|
| Peak#         | Ret. Time | Area     | Height | Conc.  |
| 1             | 32,462    | 28833022 | 637371 | 99,044 |
| 2             | 35,460    | 278425   | 6743   | 0,956  |
| Total         |           | 29111447 | 644113 |        |

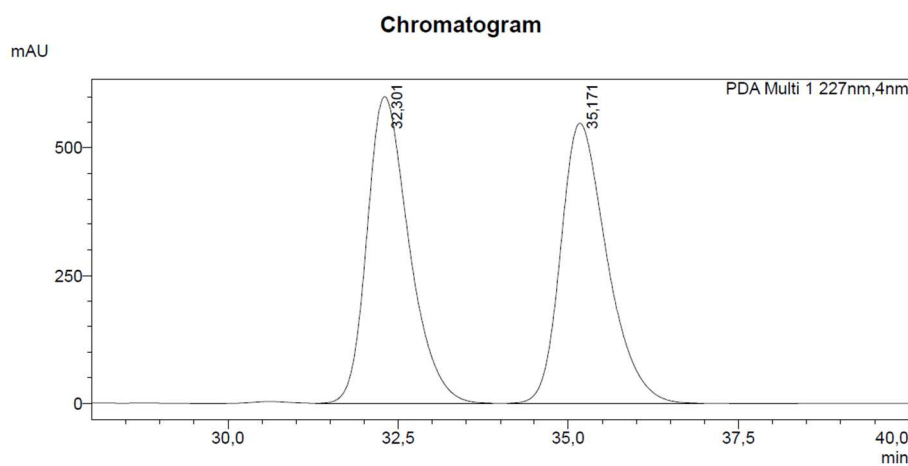

**Peak Table**

| PDA Ch1 227nm |           |          |         |        |
|---------------|-----------|----------|---------|--------|
| Peak#         | Ret. Time | Area     | Height  | Conc.  |
| 1             | 32,301    | 25771746 | 600523  | 49,885 |
| 2             | 35,171    | 25890368 | 547079  | 50,115 |
| Total         |           | 51662114 | 1147602 |        |

**(S)-N-Methyl-N-phenyl-3-methyl-pentanamide (2f)**

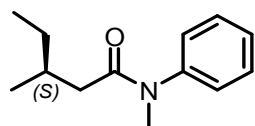

**2f**

The reaction was performed with 0.2 mmol **1f**, CuBrSMe<sub>2</sub> (2.06 mg, 0.01 mmol, 5 mol%), ligand **L1** (7.68 mg, 0.012 mmol, 6 mol%), BF<sub>3</sub>·Et<sub>2</sub>O (50 μL, 0.4 mmol), EtMgBr (0.4 mmol, 3.0 M in Et<sub>2</sub>O), 2.0



mL of DCM at  $-78\text{ }^{\circ}\text{C}$ . Product **2f** was obtained as a colorless oil after column chromatography ( $\text{SiO}_2$ , pentane: $\text{Et}_2\text{O}$  3:1) [66% yield, 77% *ee*].

$^1\text{H}$  NMR ( $\text{CDCl}_3$ , 400 MHz):  $\delta$  7.40 (t,  $J = 7.6$  Hz, 2H,  $\text{CH}_{\text{Ar}}$ ), 7.32 (t,  $J = 7.3$  Hz, 1H,  $\text{CH}_{\text{Ar}}$ ), 7.15 (d,  $J = 7.5$  Hz, 2H,  $\text{CH}_{\text{Ar}}$ ), 3.25 (s, 3H,  $\text{NCH}_3$ ), 2.08-2.06 (m, 1H,  $\text{CHHCO}$ ), 1.91-1.83 (m, 2H,  $\text{CHHCO}$ ,  $\text{CH}$ ), 1.24-1.20 (m, 1H,  $\text{CH}_3\text{CHH}$ ), 1.06-1.03 (m, 1H,  $\text{CH}_3\text{CHH}$ ), 0.81 (d,  $J = 6.0$  Hz, 3H,  $\text{CH}_3\text{CH}$ ), 0.75 (t,  $J = 7.4$  Hz, 3H,  $\text{CH}_3\text{CH}_2$ ).

$^{13}\text{C}$  NMR ( $\text{CDCl}_3$ , 100 MHz):  $\delta$  172.9, 144.5, 129.8, 127.7, 127.6, 41.0, 37.5, 32.3, 29.5, 19.5, 11.5.

HRMS (ESI+,  $m/z$ ): calcd for  $\text{C}_{13}\text{H}_{20}\text{NO}$  [ $\text{M}+\text{H}$ ] $^+$ : 206.15394, found: 206.15401.

HPLC: Chiracel-OZH, *n*-heptane/*i*-PrOH 95:5, 0.5 mL/min,  $40\text{ }^{\circ}\text{C}$ , detection at 245 nm. Retention time (min): 18.0 (major) and 19.9 (minor).

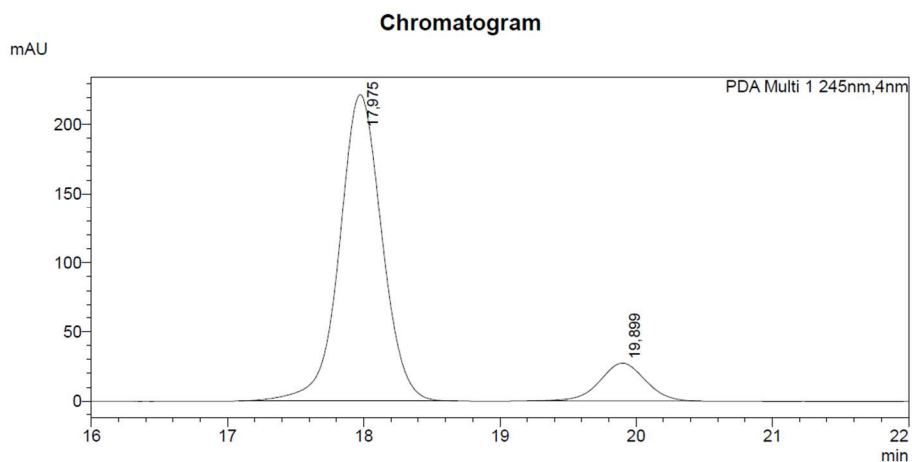

**Peak Table**

| PDA Ch1 245nm |           |         |        |        |
|---------------|-----------|---------|--------|--------|
| Peak#         | Ret. Time | Area    | Height | Conc.  |
| 1             | 17.975    | 4787286 | 221909 | 88,357 |
| 2             | 19.899    | 630834  | 27026  | 11,643 |
| Total         |           | 5418120 | 248935 |        |

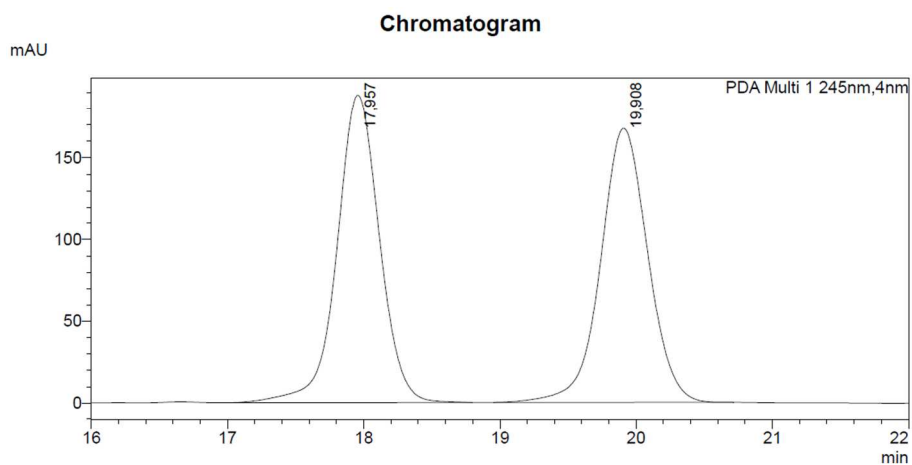

**Peak Table**

| PDA Ch1 245nm |           |         |        |        |
|---------------|-----------|---------|--------|--------|
| Peak#         | Ret. Time | Area    | Height | Conc.  |
| 1             | 17.957    | 4078662 | 187675 | 50.266 |
| 2             | 19.908    | 4035524 | 167194 | 49.734 |
| Total         |           | 8114186 | 354869 |        |

**(S)-N-Methyl-N-tosyl-3-methyl-pentanamide (2g)**

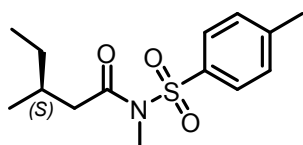

**2g**

The reaction was performed with 0.1 mmol **1g**, CuBrSMe<sub>2</sub> (2.06 mg, 0.01 mmol, 10 mol%), ligand **L1** (7.68 mg, 0.012 mmol, 12 mol%), BF<sub>3</sub>·Et<sub>2</sub>O (25 μL, 0.2 mmol), EtMgBr (0.2 mmol, 3.0 M in Et<sub>2</sub>O), 1.0 mL of DCM at -78 °C. Product **2g** was obtained as a colorless oil after column chromatography (SiO<sub>2</sub>, pentane:Et<sub>2</sub>O 10:1) [83% yield, 86% ee]. *Note: When the reaction was carried out in the absence of Lewis acid the product **2g** was obtained in 60% yield and 36% ee.*

<sup>1</sup>H NMR (CDCl<sub>3</sub>, 400 MHz): δ 7.76 (d, *J* = 8.3 Hz, 2H, CH<sub>Ar</sub>), 7.33 (d, *J* = 8.0 Hz, 2H, CH<sub>Ar</sub>), 3.29 (s, 3H, NCH<sub>3</sub>), 2.61 (dd, *J* = 16.3, 5.7 Hz, 1H, CHHCO), 2.46 (dd, *J* = 16.3, 7.9 Hz, 1H, CHHCO), 2.43 (s, 3H, PhCH<sub>3</sub>), 1.98-1.86 (m, 1H, CH<sub>3</sub>CH), 1.35-1.25 (m, 1H, CH<sub>3</sub>CHH), 1.19-1.08 (m, 1H, CH<sub>3</sub>CHH), 0.83 (d, *J* = 6.6 Hz, 3H, CH<sub>3</sub>CH), 0.82 (t, *J* = 7.4 Hz, 3H, CH<sub>3</sub>CH<sub>2</sub>).

$^{13}\text{C}$  NMR ( $\text{CDCl}_3$ , 100 MHz):  $\delta$  173.1, 144.9, 136.6, 129.9, 127.5, 43.4, 33.2, 31.6, 29.4, 21.8, 19.3, 11.4.

HRMS (ESI+,  $m/z$ ): calcd for  $\text{C}_{14}\text{H}_{23}\text{N}_3\text{OS}$   $[\text{M}+\text{H}]^+$ : 284.13149, found: 284.13154.

HPLC: Chiracel-OZH, *n*-heptane/*i*-PrOH 99.2:0.8, 0.5 mL/min, 40 °C, detection at 235 nm. Retention time (min): 94.7 (major) and 107.0 (minor).

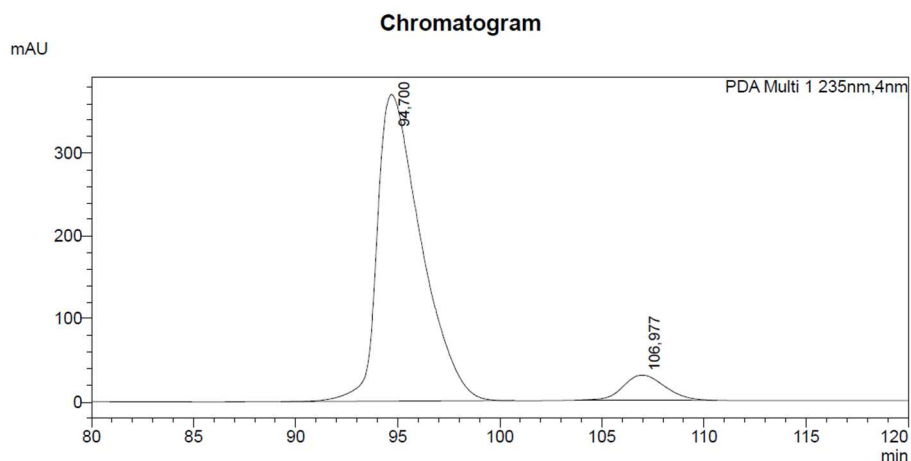

**Peak Table**

| PDA Ch1 235nm |           |          |        |        |
|---------------|-----------|----------|--------|--------|
| Peak#         | Ret. Time | Area     | Height | Conc.  |
| 1             | 94.700    | 55248018 | 370230 | 92,854 |
| 2             | 106.977   | 4251673  | 29966  | 7,146  |
| Total         |           | 59499691 | 400196 |        |

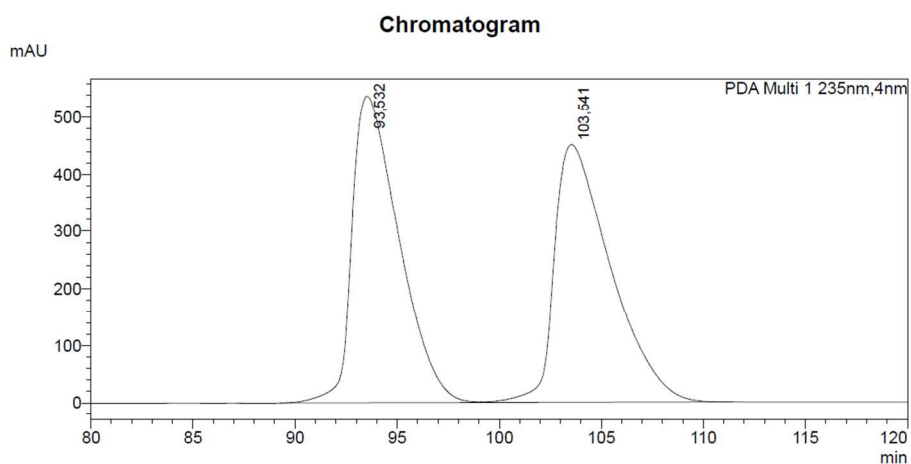

**Peak Table**

| PDA Ch1 235nm |           |           |        |        |
|---------------|-----------|-----------|--------|--------|
| Peak#         | Ret. Time | Area      | Height | Conc.  |
| 1             | 93.532    | 85991452  | 537967 | 49,790 |
| 2             | 103.541   | 86715601  | 451024 | 50,210 |
| Total         |           | 172707054 | 988991 |        |

**(S)-N-Methyl-3-methyl-pentanamide (2h)**

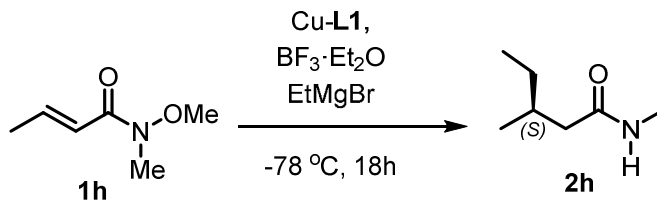

The reaction was performed with 0.2 mmol **1h**, CuBrSMe<sub>2</sub> (2.06 mg, 0.01 mmol, 5 mol%), ligand **L1** (7.68 mg, 0.012 mmol, 6 mol%), BF<sub>3</sub>·Et<sub>2</sub>O (50 μL, 0.4 mmol), EtMgBr (0.4 mmol, 3.0 M in Et<sub>2</sub>O), 2.0 mL of DCM at -78 °C. Product **2h** was obtained as a colorless oil after column chromatography (SiO<sub>2</sub>, Et<sub>2</sub>O) [65% yield, 95% *ee*].

*Note:* Only demethoxylated product **2h**, most likely promoted by the Grignard reagent, was obtained. Decreasing the amount of Grignard reagent to 0.2 mmol led to decrease in the substrate conversion (which was also demethoxylated) and once again **2h** was the major product.

<sup>1</sup>H NMR (CDCl<sub>3</sub>, 400 MHz): δ 5.61 (br s, 1H, NH), 2.79 (d, *J* = 4.9 Hz, 3H, NCH<sub>3</sub>), 2.20-2.13 (m, 1H, CHHCO), 1.94-1.82 (m, 2H, CHHCO, CH), 1.40-1.30 (m, 1H, CH<sub>3</sub>CHH), 1.24-1.12 (m, 1H, CH<sub>3</sub>CHH), 0.90 (d, *J* = 6.2 Hz, 3H, CH<sub>3</sub>CH), 0.87 (t, *J* = 7.4 Hz, 3H, CH<sub>3</sub>CH<sub>2</sub>).

<sup>13</sup>C NMR (CDCl<sub>3</sub>, 100 MHz): δ 173.6, 44.3, 32.4, 29.6, 26.3, 19.3, 11.4.

HRMS (ESI+, *m/z*): calcd for C<sub>7</sub>H<sub>16</sub>NO [M+H]<sup>+</sup>: 130.12264, found: 130.12266.

HPLC: Chiracel-ASH, *n*-heptane/*i*-PrOH 98:2, 0.5 mL/min, 40 °C, detection at 207 nm. Retention time (min): 29.8 (major) and 35.3 (minor).

<Chromatogram>

mAU

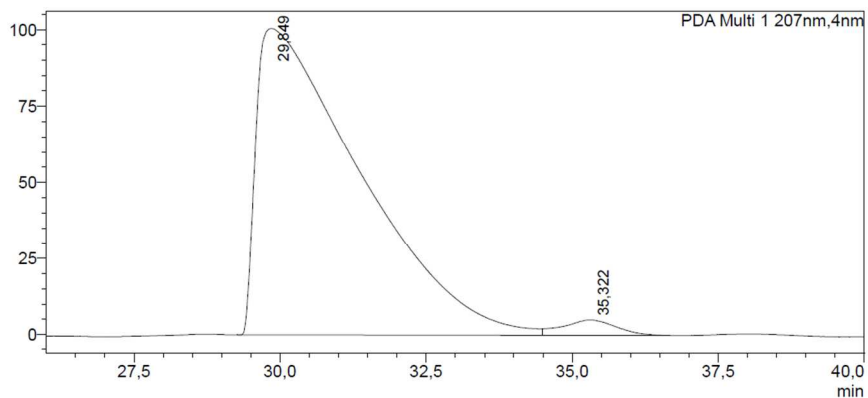

Peak Table

| PDA Ch1 207nm |           |          |        |        |
|---------------|-----------|----------|--------|--------|
| Peak#         | Ret. Time | Area     | Height | Conc.  |
| 1             | 29.849    | 12482944 | 100609 | 97,509 |
| 2             | 35.322    | 318904   | 4979   | 2,491  |
| Total         |           | 12801848 | 105588 |        |

Chromatogram

mAU

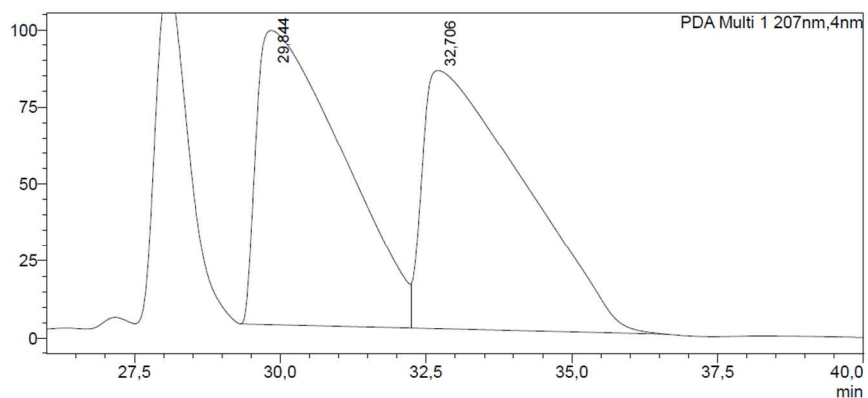

Peak Table

| PDA Ch1 207nm |           |          |        |        |
|---------------|-----------|----------|--------|--------|
| Peak#         | Ret. Time | Area     | Height | Conc.  |
| 1             | 29.844    | 9815559  | 95488  | 49,279 |
| 2             | 32.706    | 10102927 | 83645  | 50,721 |
| Total         |           | 19918486 | 179133 |        |

**(S)-3-Methyl-1-(4-morpholinyl)-pentan-1-one (2i)**

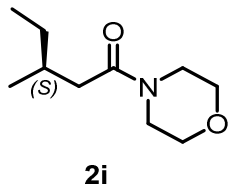

The reaction was performed with 0.2 mmol **1i**, CuBrSMe<sub>2</sub> (2.06 mg, 0.01 mmol, 5 mol%), ligand **L1** (7.68 mg, 0.012 mmol, 6 mol%), BF<sub>3</sub>·Et<sub>2</sub>O (50 μL, 0.4 mmol), EtMgBr (0.4 mmol, 3.0 M in Et<sub>2</sub>O), 2.0 mL of DCM at -78 °C. Product **2i** was obtained as a colorless oil after column chromatography (SiO<sub>2</sub>, pentane:Et<sub>2</sub>O 1:1 [75% yield, 96% *ee*].

<sup>1</sup>H NMR (CDCl<sub>3</sub>, 400 MHz): δ 3.68-3.49 (m, 8H, NCH<sub>2</sub>CH<sub>2</sub>O), 2.31 (dd, *J* = 14.6, 5.9 Hz, 1H, CHHCO), 2.12 (dd, *J* = 14.6, 8.2 Hz, 1H, CHHCO), 1.94-1.85 (m, 1H, CH), 1.43-1.37 (m, 1H, CH<sub>3</sub>CHH), 1.25-1.20 (m, 1H, CH<sub>3</sub>CHH), 0.94 (d, *J* = 6.6 Hz, 3H, CH<sub>3</sub>CH), 0.90 (t, *J* = 7.4 Hz, 3H, CH<sub>3</sub>CH<sub>2</sub>).

<sup>13</sup>C NMR (CDCl<sub>3</sub>, 100 MHz): δ 171.6, 67.1, 66.8, 46.4, 42.0, 40.1, 32.1, 29.7, 19.5, 11.5.

HRMS (ESI+, *m/z*): calcd for C<sub>10</sub>H<sub>20</sub>NO<sub>2</sub> [M+H]<sup>+</sup>: 186.14886, found: 186.14893.

HPLC: Chiracel-OBH, *n*-heptane/*i*-PrOH 95:5, 0.5 mL/min, 40 °C, detection at 208 nm. Retention time (min): 17.5 (minor) and 18.7 (major).

### Chromatogram

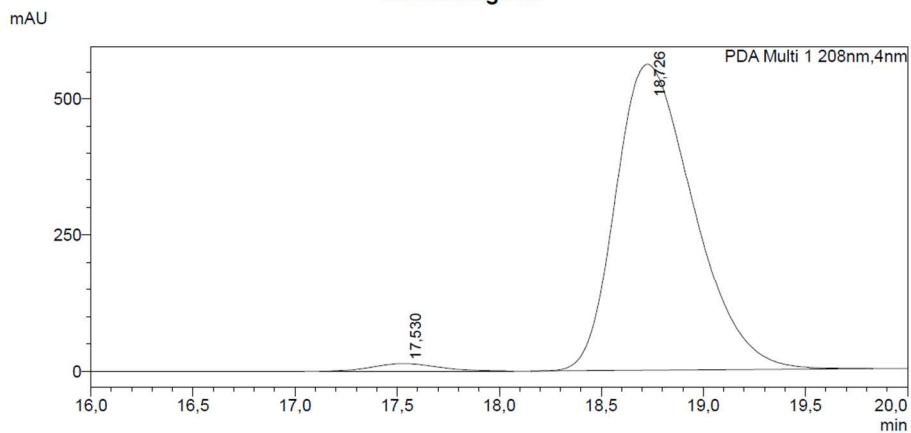

### Peak Table

| PDA Ch1 208nm |           |          |        |        |
|---------------|-----------|----------|--------|--------|
| Peak#         | Ret. Time | Area     | Height | Conc.  |
| 1             | 17.530    | 300198   | 13745  | 1.976  |
| 2             | 18.726    | 14892120 | 563258 | 98.024 |
| Total         |           | 15192318 | 577002 |        |

### Chromatogram

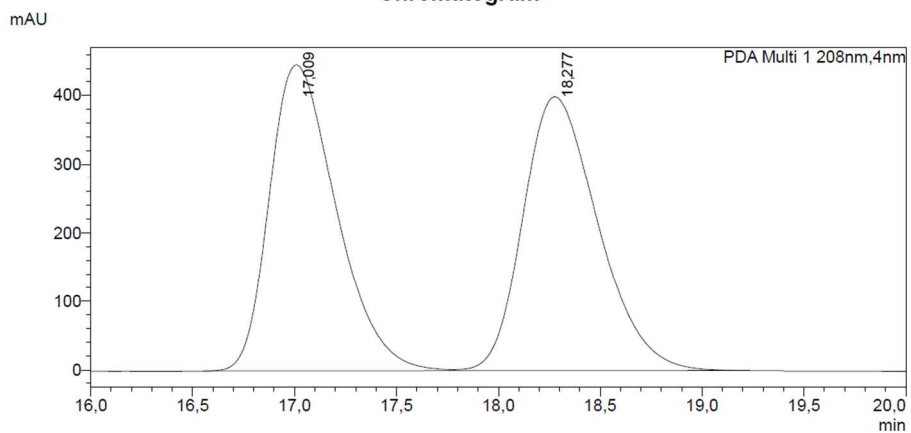

### Peak Table

| PDA Ch1 208nm |           |          |        |        |
|---------------|-----------|----------|--------|--------|
| Peak#         | Ret. Time | Area     | Height | Conc.  |
| 1             | 17.009    | 10189441 | 446410 | 49.898 |
| 2             | 18.277    | 10230956 | 398335 | 50.102 |
| Total         |           | 20420397 | 844745 |        |

**(R)-4-Ethyl-1-methylpiperidin-2-one (2j)**

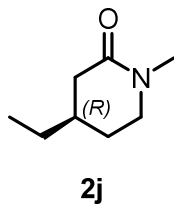

The reaction was performed with 0.2 mmol **1j**, CuBrSMe<sub>2</sub> (2.06 mg, 0.01 mmol, 5 mol%), ligand **L1** (7.68 mg, 0.012 mmol, 6 mol%), EtMgBr (0.4 mmol, 3.0 M in Et<sub>2</sub>O) in 2.0 mL of DCM at -50 °C. Product **2j** was obtained as a pale yellow oil after column chromatography (SiO<sub>2</sub>, Et<sub>2</sub>O) [75% yield, 93% *ee*].

<sup>1</sup>H NMR (CDCl<sub>3</sub>, 400 MHz): δ 3.30-3.27 (m, 2H, CH<sub>2</sub>N), 2.93 (s, 3H, NCH<sub>3</sub>), 2.54-2.48 (m, 1H, CH), 2.00-1.88 (m, 2H, CH<sub>2</sub>CO), 1.75-1.64 (m, 1H, CH<sub>2</sub>CHHCH), 1.49-1.39 (m, 1H, CH<sub>2</sub>CHHCH), 1.33 (dq, *J* = 14.5, 7.3, Hz, 2H, CH<sub>2</sub>CH<sub>3</sub>), 0.91 (t, *J* = 7.3 Hz, 3H, CH<sub>3</sub>CH<sub>2</sub>).

<sup>13</sup>C NMR (CDCl<sub>3</sub>, 100 MHz): δ 170.1, 49.4, 38.6, 34.9, 34.6, 28.9, 28.6, 11.2.

HRMS (ESI+, *m/z*): calcd for C<sub>8</sub>H<sub>16</sub>NO [M+H]<sup>+</sup>: 142.12264, found: 142.12263.

HPLC: Chiracel-ODH, *n*-heptane/*i*-PrOH 98:02, 0.5 mL/min, 40 °C, detection at 202 nm. Retention time (min): 43.0 (major) and 45.7 (minor).



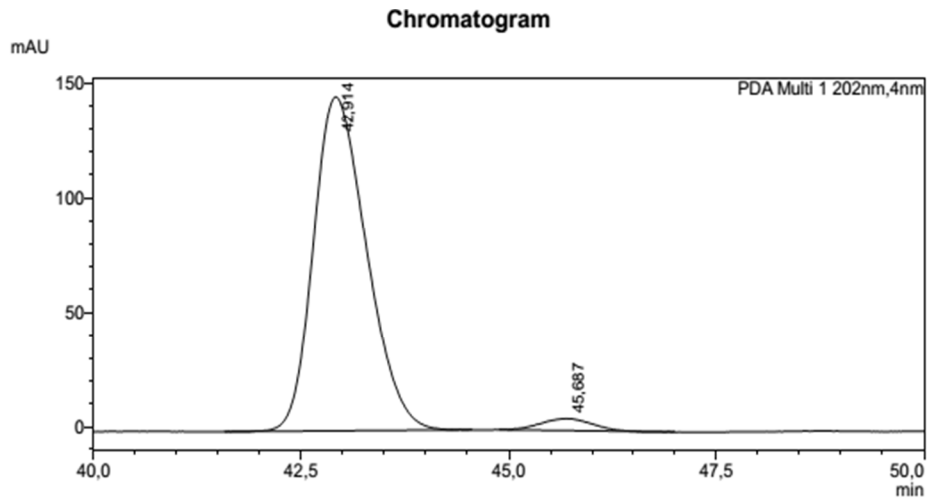

**Peak Table**

PDA Ch1 202nm

| Peak# | Ret. Time | Area    | Height | Conc.  |
|-------|-----------|---------|--------|--------|
| 1     | 42.914    | 6486680 | 145799 | 96,727 |
| 2     | 45,687    | 219477  | 5161   | 3,273  |
| Total |           | 6706157 | 150960 |        |

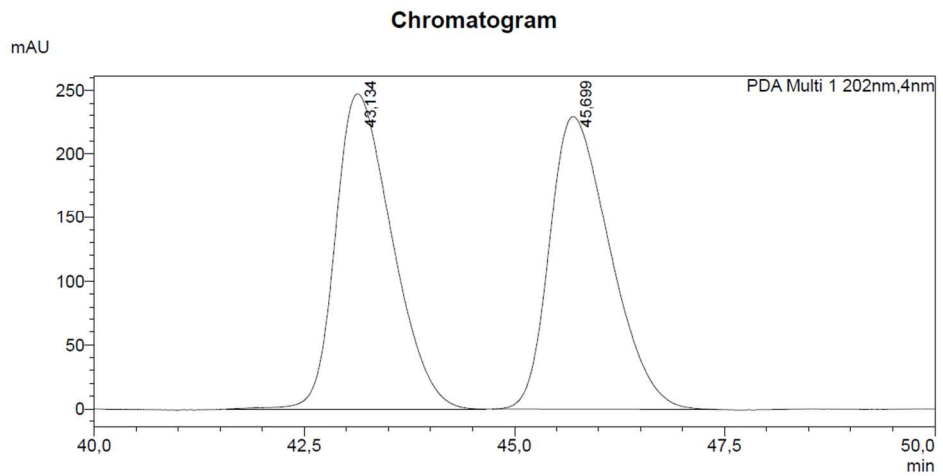

**Peak Table**

PDA Ch1 202nm

| Peak# | Ret. Time | Area     | Height | Conc.  |
|-------|-----------|----------|--------|--------|
| 1     | 43,134    | 11554476 | 247557 | 50,134 |
| 2     | 45,699    | 11492915 | 229038 | 49,866 |
| Total |           | 23047391 | 476594 |        |

**(R)-N,N-Diallyl-3-ethylhexanamide (2k)**

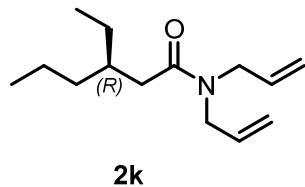

The reaction was performed with 0.2 mmol **1k**, CuBrSMe<sub>2</sub> (2.06 mg, 0.01 mmol, 5 mol%), ligand **L1** (7.68 mg, 0.012 mmol, 6 mol%), BF<sub>3</sub>·Et<sub>2</sub>O (50 μL, 0.4 mmol), EtMgBr (0.4 mmol, 3.0 M in Et<sub>2</sub>O), 2.0 mL of DCM at -78 °C. Product **2k** was obtained as a colorless oil after column chromatography (SiO<sub>2</sub>, pentane:Et<sub>2</sub>O 5:1) [71% yield, 98% *ee*].

<sup>1</sup>H NMR (CDCl<sub>3</sub>, 400 MHz): δ 5.80-5.70 (m, 2H, CH=CH<sub>2</sub>), 5.20-5.07 (m, 4H, CH=CH<sub>2</sub>), 3.98 (dt, *J* = 6.0, 1.4 Hz, 2H, NCH<sub>2</sub>CH=CH<sub>2</sub>), 3.86 (dt, *J* = 4.8, 1.8 Hz, 2H, NCH<sub>2</sub>CH=CH<sub>2</sub>), 2.21 (dd, *J* = 15.2, 7.2 Hz, 1H, CHHCO), 2.20 (dd, *J* = 15.2, 6.6 Hz, 1H, CHHCO), 1.95-1.86 (m, 1H, CHCH<sub>2</sub>), 1.36-1.21 (m, 6H, CH<sub>2</sub>), 0.88 (t, *J* = 6.8 Hz, 3H, CH<sub>3</sub>), 0.85 (t, *J* = 7.4 Hz, 3H, CH<sub>3</sub>).

<sup>13</sup>C NMR (CDCl<sub>3</sub>, 100 MHz): δ 173.0, 133.6, 133.2, 117.1, 116.6, 49.3, 48.0, 37.5, 36.1, 35.6, 26.4, 19.9, 14.5, 11.0.

HRMS (ESI+, *m/z*): calcd for C<sub>14</sub>H<sub>26</sub>NO [M-H]<sup>+</sup>: 224.20089, found: 224.20105.

HPLC: Chiracel-ADH, *n*-heptane/*i*-PrOH 99.2:2, 0.5 mL/min, 40 °C, detection at 220 nm. Retention time (min): 23.8 (major) and 25.5 (minor).

### Chromatogram

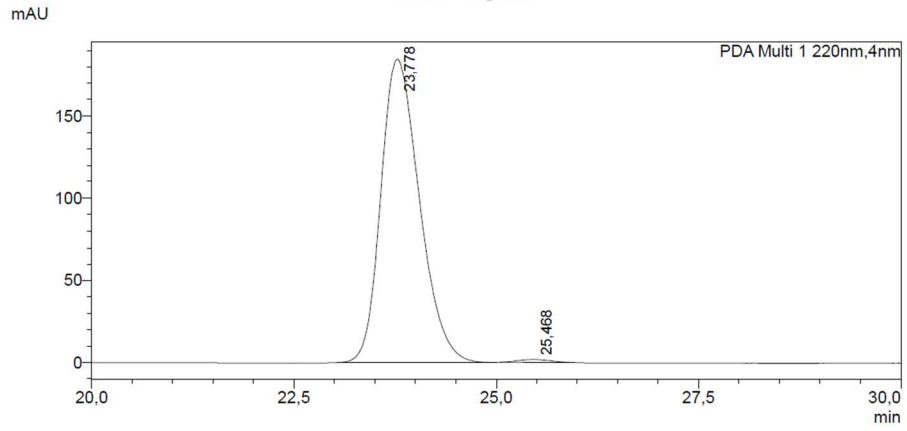

### Peak Table

| PDA Ch1 220nm |           |         |        |        |
|---------------|-----------|---------|--------|--------|
| Peak#         | Ret. Time | Area    | Height | Conc.  |
| 1             | 23,778    | 6122919 | 184791 | 99,193 |
| 2             | 25,468    | 49793   | 1809   | 0,807  |
| Total         |           | 6172712 | 186600 |        |

### Chromatogram

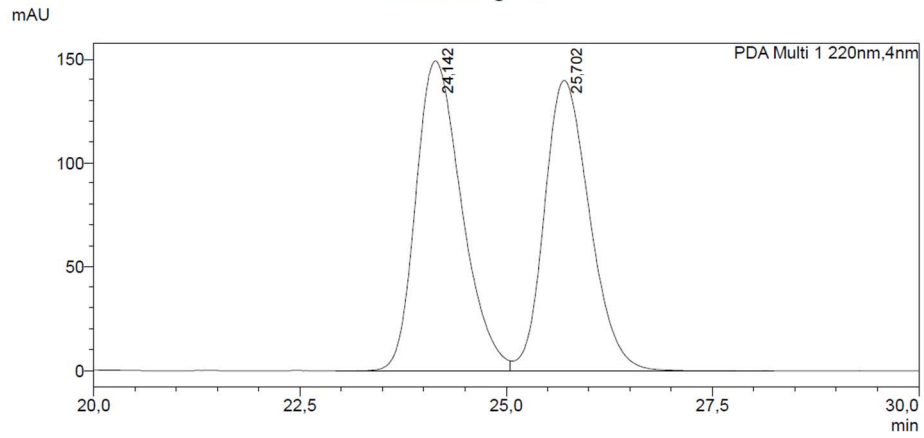

### Peak Table

| PDA Ch1 220nm |           |          |        |        |
|---------------|-----------|----------|--------|--------|
| Peak#         | Ret. Time | Area     | Height | Conc.  |
| 1             | 24,142    | 5741742  | 149285 | 51,979 |
| 2             | 25,702    | 5304468  | 139387 | 48,021 |
| Total         |           | 11046210 | 288672 |        |

**(S)-N,N-Dimethyl-3-cyclohexyl-pentanamide (2I)**

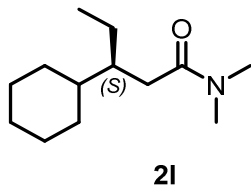

The reaction was performed with 0.1 mmol **1I**, CuBr·SMe<sub>2</sub> (1.03 mg, 0.005 mmol, 5 mol%), ligand **L1** (3.84 mg, 0.006 mmol, 6 mol%), BF<sub>3</sub>·Et<sub>2</sub>O (25 μL, 0.2 mmol), EtMgBr (0.2 mmol, 3.0 M in Et<sub>2</sub>O), 1.0 mL of DCM at -78 °C. Product **2I** was obtained as a colorless oil after column chromatography (SiO<sub>2</sub>, pentane:Et<sub>2</sub>O 1:1) [73% yield, 93% *ee*].

<sup>1</sup>H NMR (CDCl<sub>3</sub>, 400 MHz): δ 3.01 (s, 3H, NCH<sub>3</sub>), 2.94 (s, 3H, NCH<sub>3</sub>), 2.30 (dd, *J* = 15.1, 5.7 Hz, 1H, CHHCO), 2.13 (dd, *J* = 15.1, 7.8 Hz, 1H, CHHCO), 1.77-1.57 (m, 6H, CH<sub>2</sub>, CH), 1.42-0.96 (m, 8H, CH<sub>2</sub>, CH), 0.86 (t, *J* = 7.4 Hz, 3H, CH<sub>3</sub>CH<sub>2</sub>).

<sup>13</sup>C NMR (CDCl<sub>3</sub>, 100 MHz): δ 173.5, 41.8, 40.0, 37.6, 35.7, 34.7, 30.2, 29.4, 27.00, 26.96 (2C), 23.8, 12.0.

HRMS (ESI<sup>+</sup>, *m/z*): calcd for C<sub>13</sub>H<sub>26</sub>NO [M+H]<sup>+</sup>: 212.20089, found: 212.20080.

HPLC: Chiracel-OZH, *n*-heptane/*i*-PrOH 95:5, 0.5 mL/min, 40 °C, detection at 206 nm. Retention time (min): 20.6 (major) and 22.2 (minor).

### Chromatogram

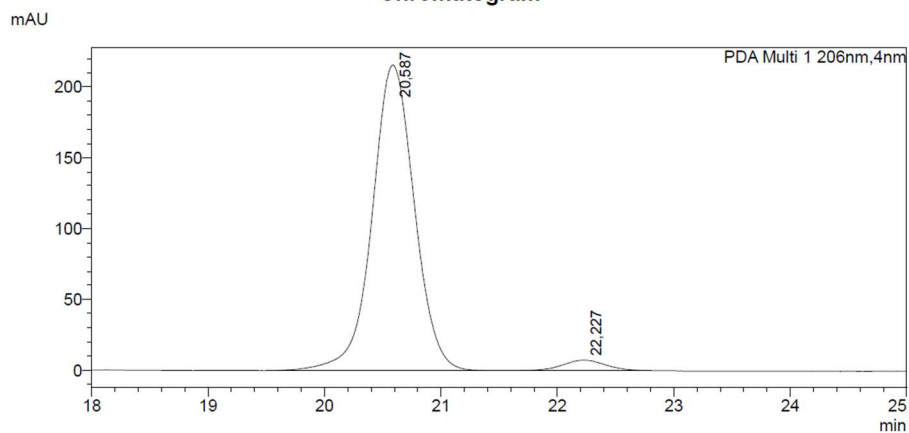

### Peak Table

| PDA Ch1 206nm |           |         |        |        |
|---------------|-----------|---------|--------|--------|
| Peak#         | Ret. Time | Area    | Height | Conc.  |
| 1             | 20.587    | 5429559 | 215927 | 96,682 |
| 2             | 22.227    | 186315  | 7329   | 3,318  |
| Total         |           | 5615874 | 223257 |        |

### Chromatogram

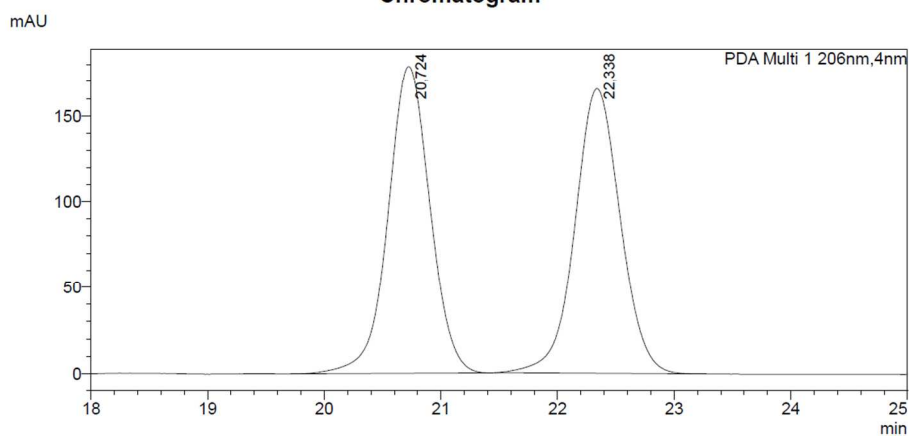

### Peak Table

| PDA Ch1 206nm |           |         |        |        |
|---------------|-----------|---------|--------|--------|
| Peak#         | Ret. Time | Area    | Height | Conc.  |
| 1             | 20.724    | 4466284 | 178591 | 49,972 |
| 2             | 22.338    | 4471287 | 165274 | 50,028 |
| Total         |           | 8937571 | 343865 |        |

**(S)-N,N-Dimethyl-3-phenylpentanamide (2m)**

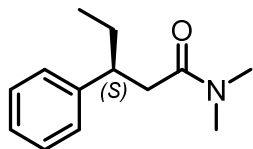

**2m**

The reaction was performed with 0.1 mmol **1m**, CuBrSMe<sub>2</sub> (1.03 mg, 0.005 mmol, 5 mol%), ligand **L1** (3.84 mg, 0.006 mmol, 6 mol%), BF<sub>3</sub>·Et<sub>2</sub>O (25 μL, 0.2 mmol), EtMgBr (0.2 mmol, 3.0 M in Et<sub>2</sub>O), 1.0 mL of DCM at -78 °C. Product **2m** was obtained as a colorless oil after column chromatography (SiO<sub>2</sub>, pentane:Et<sub>2</sub>O 1:2) [70% yield, 94% *ee*].

<sup>1</sup>H NMR (CDCl<sub>3</sub>, 400 MHz): δ 7.30-7.26 (m, 2H, CH<sub>Ar</sub>), 7.21-7.17 (m, 3H, CH<sub>Ar</sub>), 3.08 (ddt, *J* = 9.9, 7.1, 5.2 Hz, 1H, CH), 2.87 (s, 3H, NCH<sub>3</sub>), 2.83 (s, 3H, NCH<sub>3</sub>), 2.60 (dd, *J* = 15.1, 6.9 Hz, 1H, CHHCO), 2.56 (dd, *J* = 15.1, 7.2 Hz, 1H, CHHCO), 1.79 (dq, *J* = 13.5, 7.4, 5.1 Hz, 1H, CHHCH<sub>3</sub>), 1.61 (ddq, *J* = 13.5, 9.5, 7.4 Hz, 1H, CHHCH<sub>3</sub>), 0.79 (t, *J* = 7.4 Hz, 3H, CH<sub>3</sub>CH<sub>2</sub>).

<sup>13</sup>C NMR (CDCl<sub>3</sub>, 100 MHz): δ 172.0, 144.9, 128.5, 127.8, 126.4, 44.2, 40.6, 37.5, 35.5, 28.9, 12.3.

HRMS (ESI+, *m/z*): calcd for C<sub>13</sub>H<sub>20</sub>NO [M+H]<sup>+</sup>: 206.15394, found: 206.15400.

HPLC: Chiracel-ODH, *n*-heptane/*i*-PrOH 90:10, 0.5 mL/min, 40 °C, detection at 208 nm. Retention time (min): 12.1 (major) and 13.3 (minor).

### Chromatogram

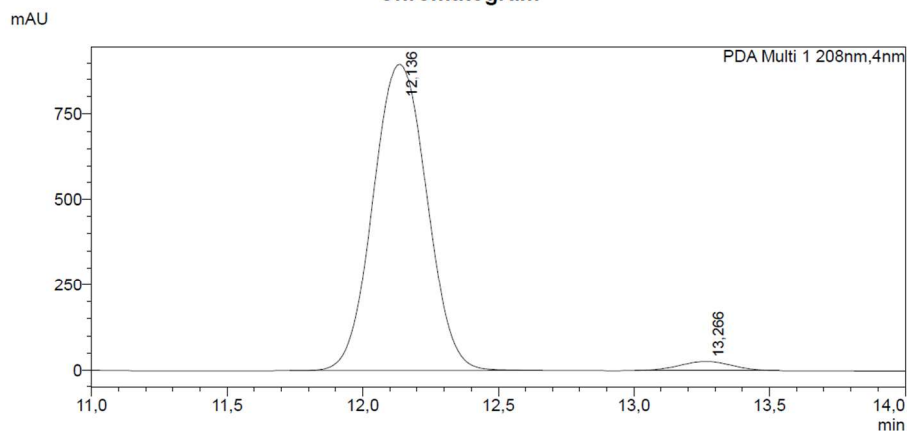

### Peak Table

| PDA Ch1 208nm |           |          |        |        |
|---------------|-----------|----------|--------|--------|
| Peak#         | Ret. Time | Area     | Height | Conc.  |
| 1             | 12,136    | 12354791 | 897209 | 97,197 |
| 2             | 13,266    | 356346   | 26637  | 2,803  |
| Total         |           | 12711136 | 923846 |        |

### Chromatogram

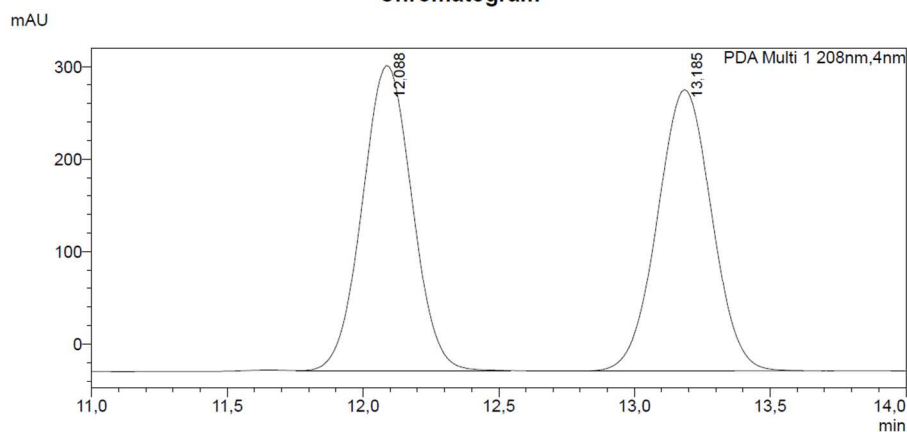

### Peak Table

| PDA Ch1 208nm |           |         |        |        |
|---------------|-----------|---------|--------|--------|
| Peak#         | Ret. Time | Area    | Height | Conc.  |
| 1             | 12,088    | 4198974 | 329626 | 49,949 |
| 2             | 13,185    | 4207513 | 303029 | 50,051 |
| Total         |           | 8406486 | 632655 |        |

**(S)-N,N-Diallyl-3-phenylpentanamide (2n)**

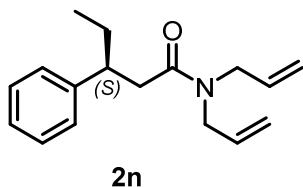

The reaction was performed with 0.1 mmol **1n**, CuBrSMe<sub>2</sub> (2.06 mg, 0.01 mmol, 10 mol%), ligand **L1** (7.68 mg, 0.012 mmol, 12 mol%), BF<sub>3</sub>·Et<sub>2</sub>O (25 μL, 0.2 mmol), in 1.0 mL of DCM at -78 °C and slow addition of a solution of EtMgBr (0.2 mmol, 3.0 M in Et<sub>2</sub>O) in 0.5 mL of toluene and added dropwise to the reaction mixture during 2 hours using a syringe pump. Product **2n** was obtained as a colorless oil after column chromatography (SiO<sub>2</sub>, pentane:Et<sub>2</sub>O 5:1) [63% yield, 93% *ee*].

<sup>1</sup>H NMR (CDCl<sub>3</sub>, 400 MHz): δ 7.30-7.28 (m, 2H, CH<sub>Ar</sub>), 7.20-7.17 (m, 3H, CH<sub>Ar</sub>), 5.70-5.60 (m, 2H, CH=CH<sub>2</sub>), 5.14 (dq, *J* = 10.4, 1.5 Hz, 1H, CHH=CH), 5.06 (dq, *J* = 10.3, 1.4 Hz, 1H, CHH=CH), 5.03 (dq, *J* = 17.1, 1.7 Hz, 1H, CHH=CH), 4.94 (dq, *J* = 17.1, 1.6 Hz, 1H, CHH=CH), 4.00 (dd, *J* = 15.3, 5.7, 1H, CHHCH=), 3.82 (dd, *J* = 15.3, 5.9, 1H, CHHCH=), 3.78-3.65 (m, 2H, CH<sub>2</sub>CH=), 3.13 (dtd, *J* = 9.8, 7.2, 5.2 Hz, 1H, CH), 2.57 (d, *J* = 7.2 Hz, 2H, CH<sub>2</sub>CO), 1.82-1.72 (m, 1H, CHHCH<sub>3</sub>), 1.65-1.54 (m, 1H, CHHCH<sub>3</sub>), 0.79 (t, *J* = 7.3 Hz, 3H, CH<sub>3</sub>CH<sub>2</sub>).

<sup>13</sup>C NMR (CDCl<sub>3</sub>, 100 MHz): δ 172.0, 144.7, 133.4, 133.0, 128.5, 127.9, 126.4, 117.0, 116.6, 49.2, 48.0, 44.2, 40.2, 29.0, 12.3.

HRMS (ESI+, *m/z*): calcd for C<sub>17</sub>H<sub>24</sub>NO [M+H]<sup>+</sup>: 258.18549, found: 258.18524.

HPLC: Chiracel-ADH, *n*-heptane/*i*-PrOH 98:2, 0.5 mL/min, 40 °C, detection at 208 nm. Retention time (min): 21.9 (major) and 26.6 (minor).



### Chromatogram

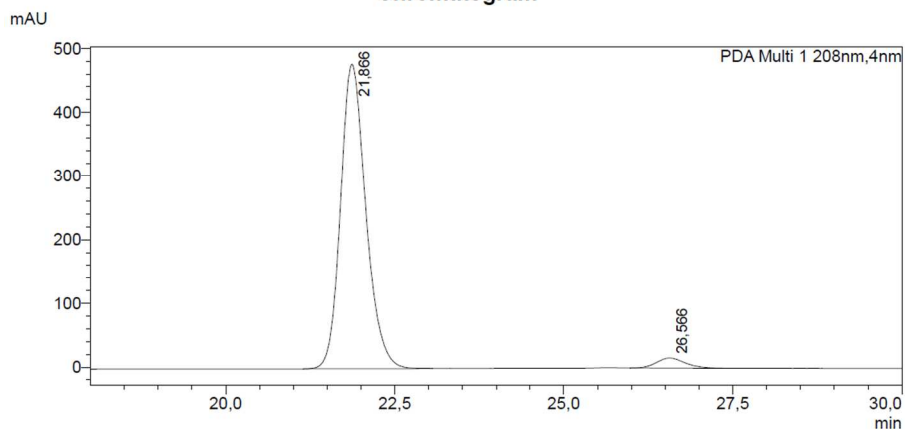

### Peak Table

PDA Ch1 208nm

| Peak# | Ret. Time | Area     | Height | Conc.  |
|-------|-----------|----------|--------|--------|
| 1     | 21.866    | 12443048 | 478839 | 96.377 |
| 2     | 26.566    | 467788   | 15844  | 3.623  |
| Total |           | 12910836 | 494684 |        |

### Chromatogram

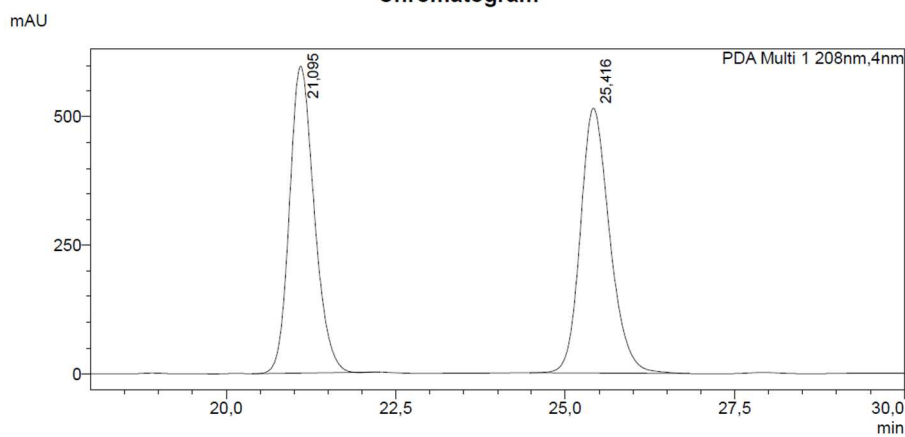

### Peak Table

PDA Ch1 208nm

| Peak# | Ret. Time | Area     | Height  | Conc.  |
|-------|-----------|----------|---------|--------|
| 1     | 21.095    | 15118330 | 597199  | 49.437 |
| 2     | 25.416    | 15462949 | 513992  | 50.563 |
| Total |           | 30581279 | 1111191 |        |

**(S)-N,N-Dimethyl-3-(4-(trifluoromethyl)phenyl)pentanamide (2o)**

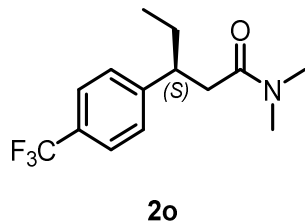

The reaction was performed with 0.1 mmol **1o**, CuBr·SMe<sub>2</sub> (1.03 mg, 0.005 mmol, 5 mol%), ligand **L1** (3.84 mg, 0.006 mmol, 6 mol%), BF<sub>3</sub>·Et<sub>2</sub>O (25 μL, 0.2 mmol), EtMgBr (0.2 mmol, 3.0 M in Et<sub>2</sub>O), 1.0 mL of DCM at -78 °C. Product **2o** was obtained as a colorless oil after column chromatography (SiO<sub>2</sub>, Et<sub>2</sub>O) [81% yield, 96% *ee*].

<sup>1</sup>H NMR (CDCl<sub>3</sub>, 400 MHz): δ 7.54 (d, *J* = 8.1 Hz, 2H, CH<sub>Ar</sub>), 7.33 (d, *J* = 8.1 Hz, 2H, CH<sub>Ar</sub>), 3.19 (dtd, *J* = 9.6, 7.0, 5.3 Hz, 1H, CH), 2.89 (s, 3H, NCH<sub>3</sub>), 2.88 (s, 3H, NCH<sub>3</sub>), 2.60 (d, *J* = 7.0 Hz, 2H, CH<sub>2</sub>CO), 1.80 (ddq, *J* = 13.4, 5.3, 7.3 Hz, 1H, CHHCH<sub>3</sub>), 1.61 (ddq, *J* = 13.4, 9.6, 7.3 Hz, 1H, CHHCH<sub>3</sub>), 0.79 (t, *J* = 7.3 Hz, 3H, CH<sub>3</sub>CH<sub>2</sub>).

<sup>13</sup>C NMR (CDCl<sub>3</sub>, 100 MHz): δ 171.4, 149.2 (q, *J* = 1.1 Hz), 128.6 (q, *J* = 32.2 Hz), 128.1, 125.4 (q, *J* = 3.8 Hz), 124.4 (q, *J* = 272.0 Hz), 43.9, 40.1, 37.4, 35.6, 29.0, 12.1.

HRMS (ESI<sup>+</sup>, *m/z*): calcd for C<sub>14</sub>H<sub>19</sub>F<sub>3</sub>NO [M+H]<sup>+</sup>: 274.14133, found: 274.14140.

HPLC: Chiracel-ADH, *n*-heptane/*i*-PrOH 98:2, 0.5 mL/min, 40 °C, detection at 203 nm. Retention time (min): 21.9 (major) and 29.7 (minor).

### Chromatogram

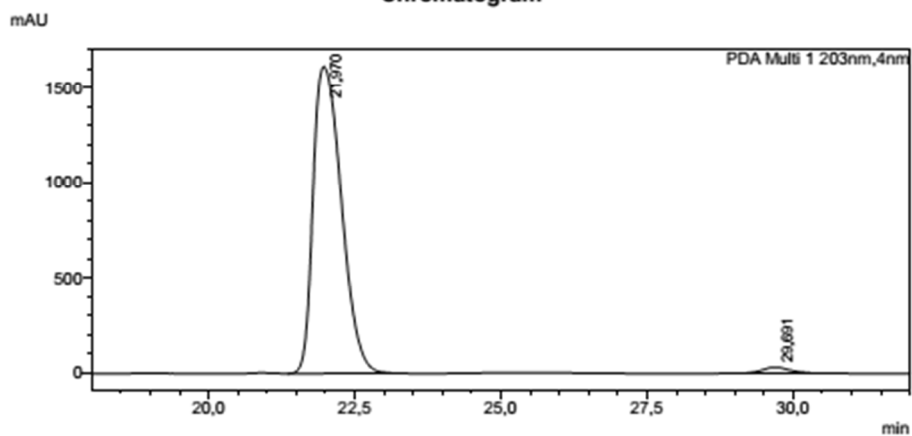

### Peak Table

| PDA Ch1 203nm |           |          |         |        |
|---------------|-----------|----------|---------|--------|
| Peak#         | Ret. Time | Area     | Height  | Conc.  |
| 1             | 21.970    | 54400969 | 1613896 | 98,109 |
| 2             | 29.691    | 1048684  | 31286   | 1,891  |
| Total         |           | 55449653 | 1645182 |        |

### Chromatogram

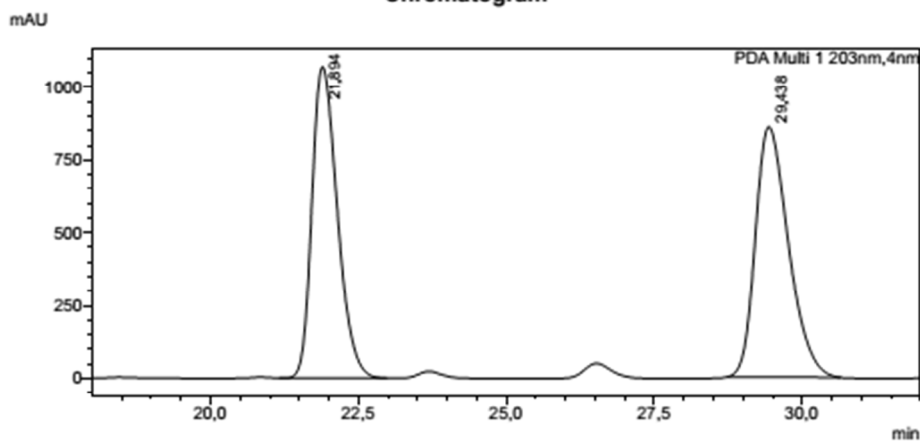

### Peak Table

| PDA Ch1 203nm |           |          |         |        |
|---------------|-----------|----------|---------|--------|
| Peak#         | Ret. Time | Area     | Height  | Conc.  |
| 1             | 21.894    | 31940760 | 1068861 | 48,894 |
| 2             | 29.438    | 33386436 | 857427  | 51,106 |
| Total         |           | 65327196 | 1926288 |        |

**(S)-N,N-Diallyl-3-(4-trifluoromethyl)phenyl)pentanamide (2p)**

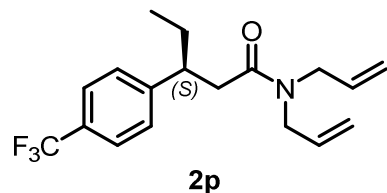

The reaction was performed with 0.1 mmol **1p**, CuBrSMe<sub>2</sub> (2.06 mg, 0.01 mmol, 10 mol%), ligand **L1** (7.68 mg, 0.012 mmol, 12 mol%), BF<sub>3</sub>·Et<sub>2</sub>O (25 μL, 0.2 mmol), in 1.0 mL of DCM at -78 °C and slow addition of a solution of EtMgBr (0.2 mmol, 3.0 M in Et<sub>2</sub>O) in 0.5 mL of toluene and added dropwise to the reaction mixture during 2 hours using a syringe pump. Product **2p** was obtained as a colorless oil after column chromatography (SiO<sub>2</sub>, pentane:Et<sub>2</sub>O 5:1) [67% yield, 90% *ee*].

<sup>1</sup>H NMR (CDCl<sub>3</sub>, 400 MHz): δ 7.53 (d, *J* = 7.8 Hz, 2H, CH<sub>Ar</sub>), 7.31 (d, *J* = 7.8 Hz, 2H, CH<sub>Ar</sub>), 5.72-5.59 (m, 2H, CH=CH<sub>2</sub>), 5.15 (dd, *J* = 10.1, 1.5 Hz, 1H, CHH=CH), 5.06 (dd, *J* = 10.2, 1.4 Hz, 1H, CHH=CH), 5.01 (dd, *J* = 17.1, 1.8 Hz, 1H, CHH=CH), 4.94 (dd, *J* = 17.1, 1.6 Hz, 1H, CHH=CH), 3.93 (ddt, *J* = 15.3, 5.8, 1.5 Hz, 1H, CHHCH=), 3.87 (ddt, *J* = 15.3, 5.9, 1.4 Hz, 1H, CHHCH=), 3.76 (dt, *J* = 4.8, 1.7 Hz, 2H, CH<sub>2</sub>CH=), 3.24 (dtd, *J* = 9.6, 7.2, 5.3 Hz, 1H, CH), 2.59 (dd, *J* = 15.6, 6.9 Hz, 1H, CHHCO), 2.59 (dd, *J* = 15.6, 7.4 Hz, 1H, CHHCO), 1.77 (dq, *J* = 13.3, 7.3, 5.3 Hz, 1H, CHHCH<sub>3</sub>), 1.77 (ddq, *J* = 13.3, 9.6, 7.3 Hz, 1H, CHHCH<sub>3</sub>), 0.78 (t, *J* = 7.3 Hz, 3H, CH<sub>3</sub>CH<sub>2</sub>).

<sup>13</sup>C NMR (CDCl<sub>3</sub>, 100 MHz): δ 171.4, 149.0, 133.2, 132.8, 129.0 (q, *J* = 30.7 Hz), 128.2, 125.4 (q, *J* = 3.7 Hz), 124.4 (q, *J* = 272.1 Hz), 117.1, 116.6, 49.2, 48.2, 43.9, 39.7, 29.0, 12.2.

HRMS (ESI+, *m/z*): calcd for C<sub>18</sub>H<sub>23</sub>F<sub>3</sub>NO [M+H]<sup>+</sup>: 326.17263, found: 326.17300.

HPLC: Chiracel-ADH, *n*-heptane/*i*-PrOH 95:5, 0.5 mL/min, 40 °C, detection at 209 nm. Retention time (min): 11.7 (major) and 15.1 (minor).

### Chromatogram

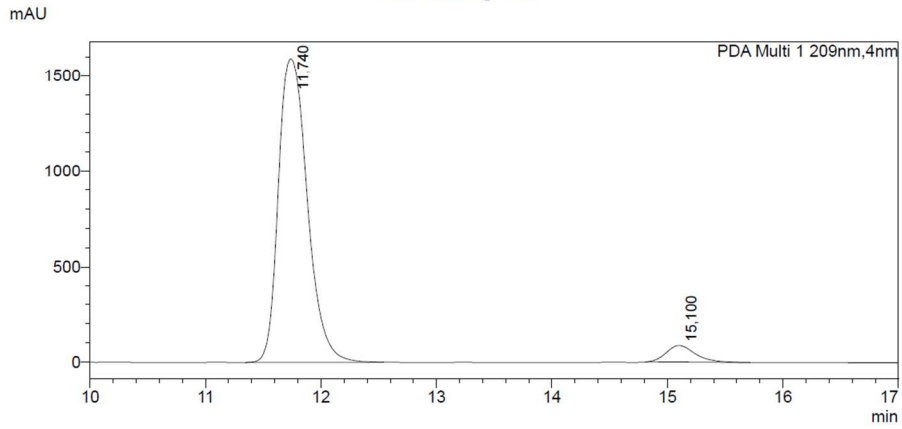

### Peak Table

| PDA Ch1 209nm |           |          |         |        |
|---------------|-----------|----------|---------|--------|
| Peak#         | Ret. Time | Area     | Height  | Conc.  |
| 1             | 11,740    | 27774942 | 1591595 | 94,880 |
| 2             | 15,100    | 1498729  | 86438   | 5,120  |
| Total         |           | 29273671 | 1678033 |        |

### Chromatogram

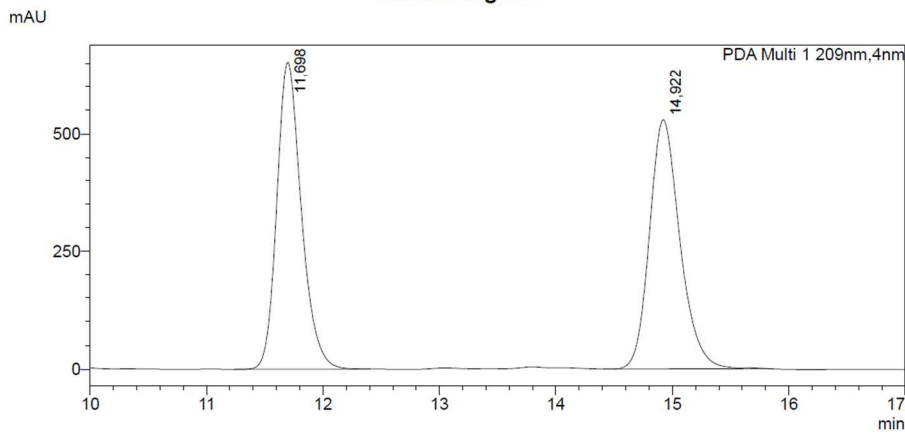

### Peak Table

| PDA Ch1 209nm |           |          |         |        |
|---------------|-----------|----------|---------|--------|
| Peak#         | Ret. Time | Area     | Height  | Conc.  |
| 1             | 11,698    | 9562547  | 653296  | 49,836 |
| 2             | 14,922    | 9625463  | 529518  | 50,164 |
| Total         |           | 19188010 | 1182814 |        |

**(S)-N,N-Dimethyl-3-(4-methoxyphenyl)pentanamide (2q)**

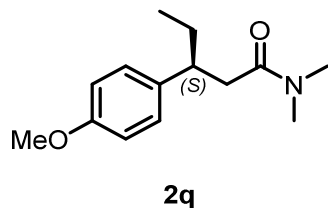

The reaction was performed with 0.1 mmol **1q**, CuBrSMe<sub>2</sub> (1.03 mg, 0.005 mmol, 5 mol%), ligand **L1** (3.84 mg, 0.006 mmol, 6 mol%), BF<sub>3</sub>·Et<sub>2</sub>O (25 μL, 0.2 mmol), EtMgBr (0.2 mmol, 3.0 M in Et<sub>2</sub>O), 1.0 mL of DCM at -78 °C. Product **2q** was obtained as a colorless oil after column chromatography (SiO<sub>2</sub>, pentane:Et<sub>2</sub>O 1:10) [70% yield, 97% *ee*].

<sup>1</sup>H NMR (CDCl<sub>3</sub>, 400 MHz): δ 7.12 (d, *J* = 8.6 Hz, 2H, CH<sub>Ar</sub>), 6.83 (d, *J* = 8.6 Hz, 2H, CH<sub>Ar</sub>), 3.78 (s, 3H, OCH<sub>3</sub>), 3.03 (dtd, *J* = 9.8, 7.1, 5.2 Hz, 1H, CH), 2.87 (s, 3H, NCH<sub>3</sub>), 2.84 (s, 3H, NCH<sub>3</sub>), 2.55 (dd, *J* = 15.5, 7.1 Hz, 1H, CHHCO), 2.54 (dd, *J* = 15.5, 7.1 Hz, 1H, CHHCO), 1.76 (dq, *J* = 14.6, 7.2, 5.2 Hz, 1H, CHHCH<sub>3</sub>), 1.57 (ddq, *J* = 14.6, 9.8, 7.2 Hz, 1H, CHHCH<sub>3</sub>), 0.78 (t, *J* = 7.3 Hz, 3H, CH<sub>3</sub>CH<sub>2</sub>).

<sup>13</sup>C NMR (CDCl<sub>3</sub>, 100 MHz): δ 172.2, 158.1, 136.9, 128.6, 113.8, 55.3, 43.5, 40.9, 37.5, 35.6, 29.1, 12.3.

HRMS (ESI+, *m/z*): calcd for C<sub>14</sub>H<sub>22</sub>NO<sub>2</sub> [M+H]<sup>+</sup>: 236.16451, found: 236.16450.

HPLC: Chiracel-OJH, *n*-heptane/*i*-PrOH 90:10, 0.5 mL/min, 40 °C, detection at 210 nm. Retention time (min): 14.0 (major) and 16.4 (minor).

### Chromatogram

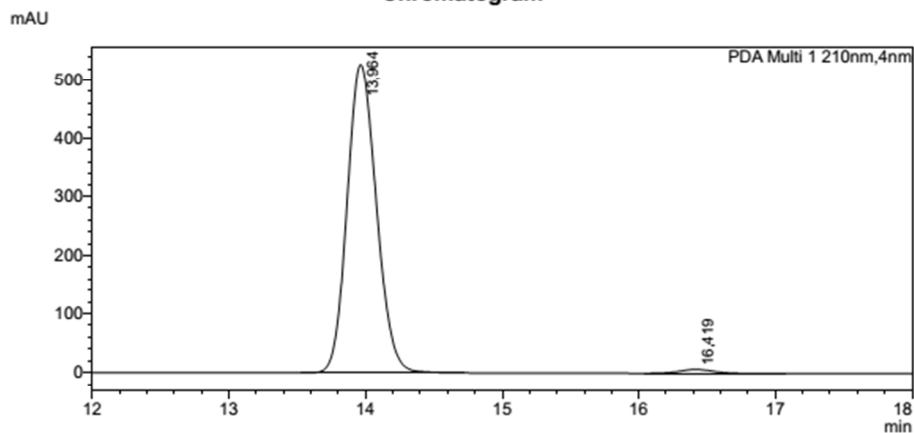

### Peak Table

| PDA Ch1 210nm |           |         |        |        |
|---------------|-----------|---------|--------|--------|
| Peak#         | Ret. Time | Area    | Height | Conc.  |
| 1             | 13.964    | 7850822 | 528047 | 98,523 |
| 2             | 16.419    | 117709  | 6702   | 1,477  |
| Total         |           | 7968531 | 534748 |        |

### Chromatogram

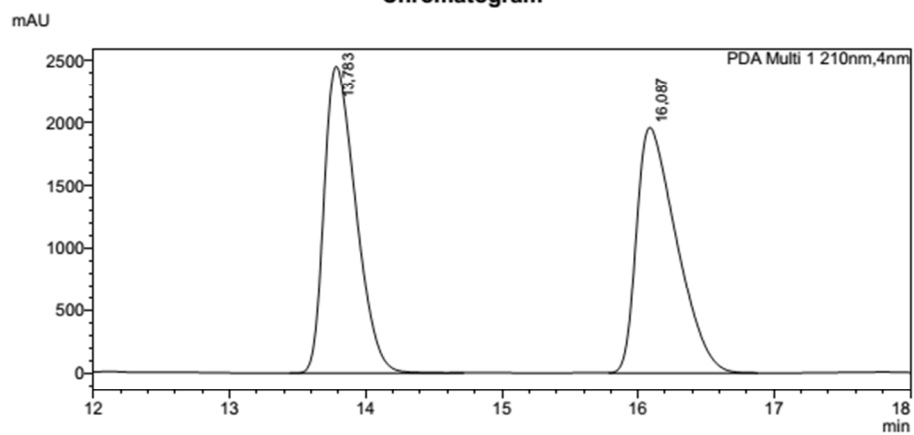

### Peak Table

| PDA Ch1 210nm |           |          |         |        |
|---------------|-----------|----------|---------|--------|
| Peak#         | Ret. Time | Area     | Height  | Conc.  |
| 1             | 13.783    | 39665936 | 2454329 | 49,783 |
| 2             | 16.087    | 40011474 | 1958244 | 50,217 |
| Total         |           | 79677409 | 4412573 |        |

**(S)-N,N-Dimethyl-3-(3-bromophenyl)pentanamide (2r)**

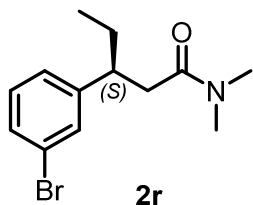

The reaction was performed with 0.1 mmol **1r**, CuBr·SMe<sub>2</sub> (1.03 mg, 0.005 mmol, 5 mol%), ligand **L1** (3.84 mg, 0.006 mmol, 6 mol%), BF<sub>3</sub>·Et<sub>2</sub>O (25 μL, 0.2 mmol), EtMgBr (0.2 mmol, 3.0 M in Et<sub>2</sub>O), 1.0 mL of DCM at -78 °C. Product **2r** was obtained as a colorless oil after column chromatography (SiO<sub>2</sub>, pentane:Et<sub>2</sub>O 1:2) [74% yield, 95% *ee*].

<sup>1</sup>H NMR (CDCl<sub>3</sub>, 400 MHz): δ 7.34-7.30 (m, 2H, CH<sub>Ar</sub>), 7.15-7.14 (m, 2H, CH<sub>Ar</sub>), 3.07 (dtd, *J* = 9.8, 7.1, 5.1 Hz, 1H, CH), 2.88 (s, 6H, NCH<sub>3</sub>), 2.55 (d, *J* = 7.0 Hz, 2H, CH<sub>2</sub>CO), 1.77 (dq, *J* = 14.7, 7.3, 5.1 Hz, 1H, CHHCH<sub>3</sub>), 1.57 (ddq, *J* = 14.7, 9.8, 7.3 Hz, 1H, CHHCH<sub>3</sub>), 0.78 (t, *J* = 7.4 Hz, 3H, CH<sub>3</sub>CH<sub>2</sub>).

<sup>13</sup>C NMR (CDCl<sub>3</sub>, 100 MHz): δ 171.5, 147.5, 130.6, 130.0, 129.5, 126.8, 122.6, 43.9, 40.2, 37.4, 35.6, 29.0, 12.2.

HRMS (ESI+, *m/z*): calcd for C<sub>13</sub>H<sub>19</sub>BrNO [M+H]<sup>+</sup>: 284.06445, found: 284.06469.

HPLC: Chiracel-ODH, *n*-heptane/*i*-PrOH 97:3, 0.5 mL/min, 40 °C, detection at 210 nm. Retention time (min): 22.0 (major) and 26.0 (minor).



### Chromatogram

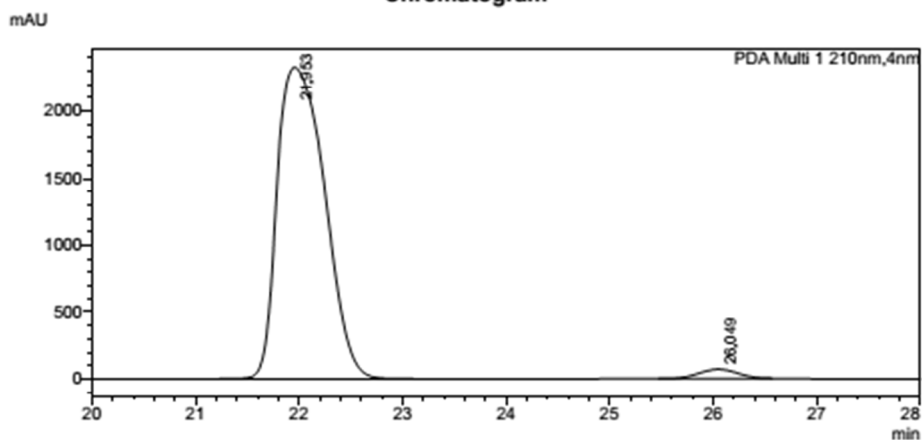

### Peak Table

| PDA Ch1 210nm |           |          |         |        |
|---------------|-----------|----------|---------|--------|
| Peak#         | Ret. Time | Area     | Height  | Conc.  |
| 1             | 21.953    | 74443452 | 2327134 | 97.606 |
| 2             | 26.049    | 1825778  | 69430   | 2.394  |
| Total         |           | 76269229 | 2396564 |        |

### Chromatogram

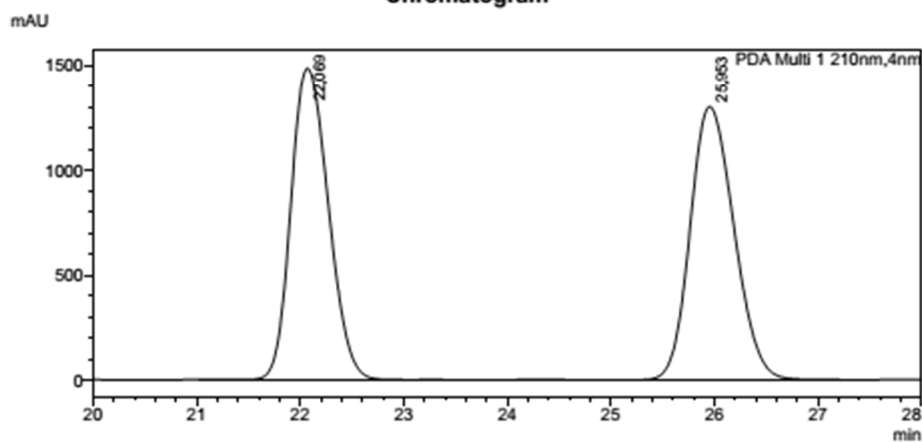

### Peak Table

| PDA Ch1 210nm |           |          |         |        |
|---------------|-----------|----------|---------|--------|
| Peak#         | Ret. Time | Area     | Height  | Conc.  |
| 1             | 22.069    | 37665334 | 1486350 | 49.455 |
| 2             | 25.953    | 38495669 | 1301772 | 50.545 |
| Total         |           | 76161003 | 2788122 |        |

**(S)-N,N-Dimethyl-3-(thiophen-2-yl)pentanamide (2s)**

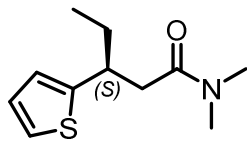

**2s**

The reaction was performed with 0.1 mmol **1s**, CuBrSMe<sub>2</sub> (1.03 mg, 0.005 mmol, 5 mol%), ligand **L1** (3.84 mg, 0.006 mmol, 6 mol%), BF<sub>3</sub>·Et<sub>2</sub>O (25 μL, 0.2 mmol), EtMgBr (0.2 mmol, 3.0 M in Et<sub>2</sub>O), 1.0 mL of DCM at -78 °C. Product **2s** was obtained as a colorless oil after column chromatography (SiO<sub>2</sub>, pentane:Et<sub>2</sub>O 1:5) [85% yield, 95% *ee*].

<sup>1</sup>H NMR (CDCl<sub>3</sub>, 400 MHz): δ 7.13 (d, *J* = 5.1 Hz, 1H, CH<sub>Ar</sub>), 6.91 (dd, *J* = 5.1, 3.4 Hz, 1H, CH<sub>Ar</sub>), 6.83 (d, *J* = 3.4 Hz, 1H, CH<sub>Ar</sub>), 3.49-3.42 (m, 1H, CH), 2.90 (s, 3H, NCH<sub>3</sub>), 2.89 (s, 3H, NCH<sub>3</sub>), 2.64 (dd, *J* = 15.2, 7.1, Hz, 1H, CHHCO), 2.58 (dd, *J* = 15.2, 6.9, Hz, 1H, CHHCO), 1.82 (dq, *J* = 14.4, 7.3, 5.1 Hz, 1H, CHHCH<sub>3</sub>), 1.61 (ddq, *J* = 14.4, 9.3, 7.3 Hz, 1H, CHHCH<sub>3</sub>), 0.88 (t, *J* = 7.2 Hz, 3H, CH<sub>3</sub>CH<sub>2</sub>).

<sup>13</sup>C NMR (CDCl<sub>3</sub>, 100 MHz): δ 171.6, 148.9, 126.7, 124.2, 123.0, 41.4, 39.6, 37.4, 35.6, 30.3, 12.2.

HRMS (ESI+, *m/z*): calcd for C<sub>11</sub>H<sub>18</sub>NOS [M+H]<sup>+</sup>: 212.11036, found: 212.11043.

HPLC: Chiracel-ADH, *n*-heptane/*i*-PrOH 90:10, 0.5 mL/min, 40 °C, detection at 218 nm. Retention time (min): 10.7 (major) and 11.9 (minor).

### Chromatogram

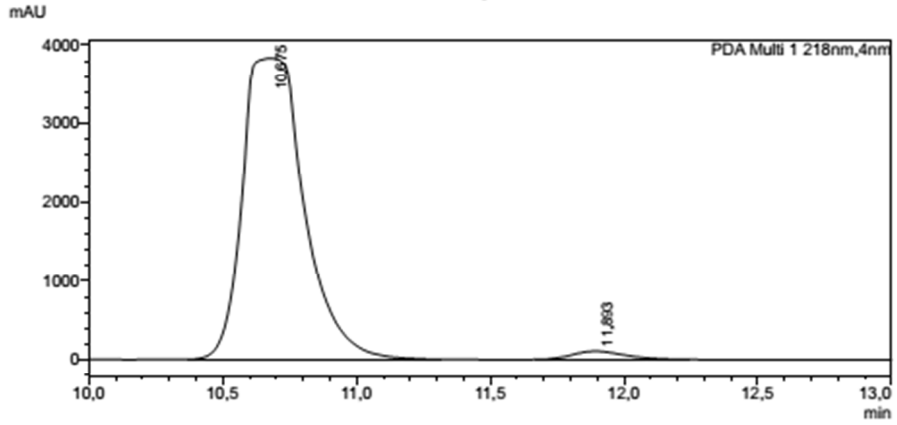

### Peak Table

| PDA Ch1 218nm |           |          |         |        |
|---------------|-----------|----------|---------|--------|
| Peak#         | Ret. Time | Area     | Height  | Conc.  |
| 1             | 10,675    | 61580191 | 3829489 | 97,636 |
| 2             | 11,893    | 1490738  | 108543  | 2,364  |
| Total         |           | 63070929 | 3938032 |        |

### Chromatogram

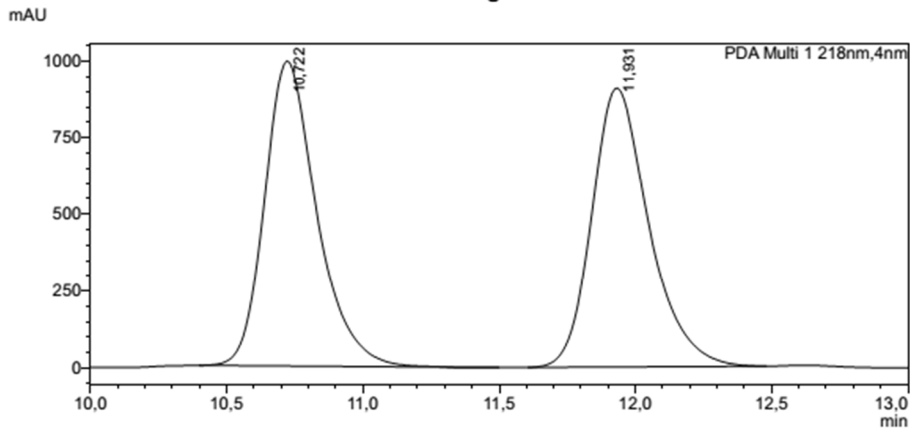

### Peak Table

| PDA Ch1 218nm |           |          |         |        |
|---------------|-----------|----------|---------|--------|
| Peak#         | Ret. Time | Area     | Height  | Conc.  |
| 1             | 10,722    | 13192277 | 994164  | 49,986 |
| 2             | 11,931    | 13199894 | 906279  | 50,014 |
| Total         |           | 26392172 | 1900443 |        |

**(S)-N,N-Diallyl-3-(thiophen-2-yl)pentanamide (2t)**

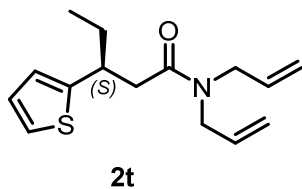

The reaction was performed with 0.1 mmol **1t**, CuBr·SMe<sub>2</sub> (2.06 mg, 0.01 mmol, 10 mol%), ligand **L1** (7.68 mg, 0.012 mmol, 12 mol%), BF<sub>3</sub>·Et<sub>2</sub>O (25 μL, 0.2 mmol), in 1.0 mL of DCM at -78 °C and slow addition of a solution of EtMgBr (0.2 mmol, 3.0 M in Et<sub>2</sub>O) in 0.5 mL of toluene and added dropwise to the reaction mixture during 2 hours using a syringe pump. Product **2t** was obtained as a colorless oil after column chromatography (SiO<sub>2</sub>, pentane:Et<sub>2</sub>O 5:1) [63% yield, 91% *ee*].

<sup>1</sup>H NMR (CDCl<sub>3</sub>, 400 MHz): δ 7.13 (d, *J* = 5.0 Hz, 1H, CH<sub>A</sub>r), 6.91 (dd, *J* = 5.0, 3.4 Hz, 1H, CH<sub>A</sub>r), 6.83 (d, *J* = 3.4 Hz, 1H, CH<sub>A</sub>r), 5.74-5.63 (m, 2H, CH=CH<sub>2</sub>), 5.16 (d, *J* = 10.4, 1H, CHH=CH), 5.10-5.04 (m, 2H, CH<sub>2</sub>=CH), 4.99 (d, *J* = 17.1, 1H, CHH=CH), 4.04 (dd, *J* = 15.3, 5.5 Hz, 1H, CHHCH=), 3.84 (dd, *J* = 15.3, 6.0 Hz, 1H, CHHCH=), 3.83-3.69 (m, 2H, CH<sub>2</sub>CH=), 3.73 (dd, *J* = 17.5, 4.7 Hz, 2H, CH<sub>2</sub>CH=), 3.54-3.47 (m, 1H, CH), 2.62 (dd, *J* = 15.1, 7.3 Hz, 1H, CHHCO), 2.57 (dd, *J* = 15.1, 6.8 Hz, 1H, CHHCO), 1.85-1.75 (m, 1H, CHHCH<sub>3</sub>), 1.66-1.54 (m, 1H, CHHCH<sub>3</sub>), 0.87 (t, *J* = 7.3 Hz, 3H, CH<sub>3</sub>CH<sub>2</sub>).

<sup>13</sup>C NMR (CDCl<sub>3</sub>, 100 MHz): δ 171.5, 148.7, 133.4, 132.9, 126.6, 124.4, 123.0, 117.1, 116.6, 49.2, 48.2, 41.1, 39.6, 30.3, 12.2.

HRMS (ESI+, *m/z*): calcd for C<sub>15</sub>H<sub>22</sub>NOS [M+H]<sup>+</sup>: 264.14166, found: 264.14193.

HPLC: Chiracel-ADH, *n*-heptane/*i*-PrOH 98:2, 0.5 mL/min, 40 °C, detection at 232 nm. Retention time (min): 21.6 (major) and 26.2 (minor).

### Chromatogram

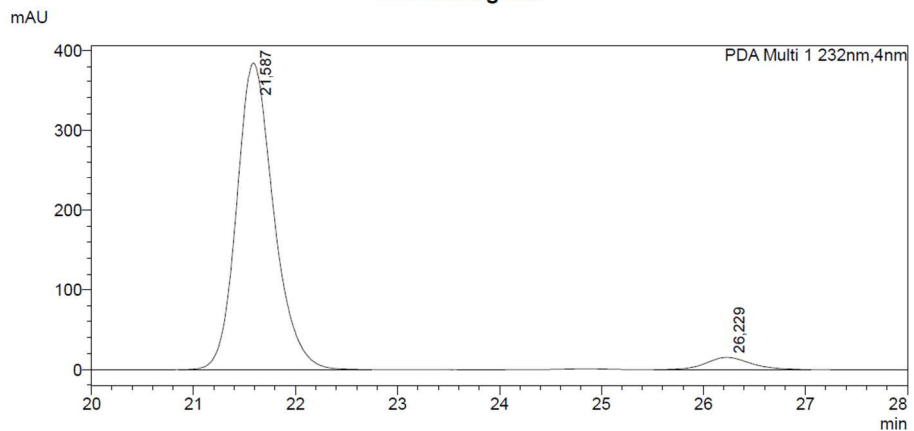

### Peak Table

| PDA Ch1 232nm |           |          |        |        |
|---------------|-----------|----------|--------|--------|
| Peak#         | Ret. Time | Area     | Height | Conc.  |
| 1             | 21.587    | 9695979  | 384425 | 95.492 |
| 2             | 26.229    | 457782   | 15181  | 4.508  |
| Total         |           | 10153761 | 399606 |        |

### Chromatogram

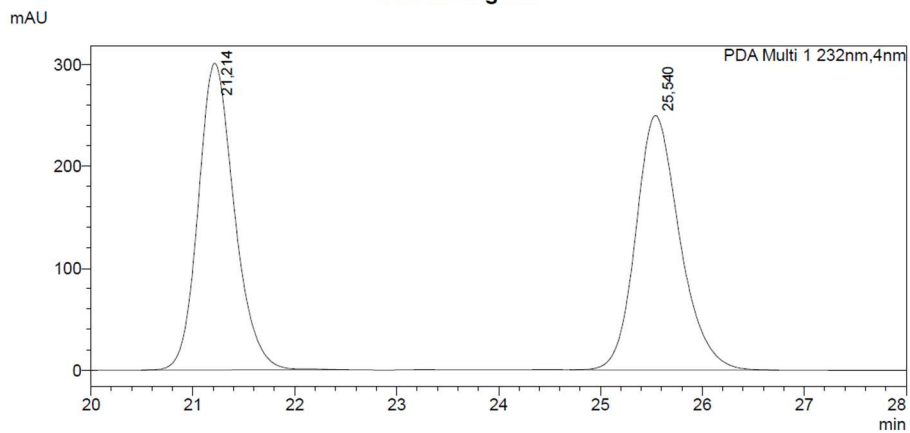

### Peak Table

| PDA Ch1 232nm |           |          |        |        |
|---------------|-----------|----------|--------|--------|
| Peak#         | Ret. Time | Area     | Height | Conc.  |
| 1             | 21.214    | 7405436  | 301200 | 49.782 |
| 2             | 25.540    | 7470289  | 249171 | 50.218 |
| Total         |           | 14875725 | 550371 |        |

**(S)-N,N-Dimethyl-3-(thiophen-2-yl)pentanamide (2u)**

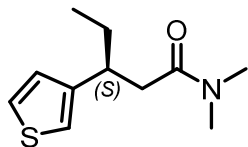

**2u**

The reaction was performed with 0.1 mmol **1u**, CuBrSMe<sub>2</sub> (1.03 mg, 0.005 mmol, 5 mol%), ligand **L1** (3.84 mg, 0.006 mmol, 6 mol%), BF<sub>3</sub>·Et<sub>2</sub>O (25 μL, 0.2 mmol), EtMgBr (0.2 mmol, 3.0 M in Et<sub>2</sub>O), 1.0 mL of DCM at -78 °C. Product **2u** was obtained as a colorless oil after column chromatography (SiO<sub>2</sub>, pentane:Et<sub>2</sub>O 1:5) [63% yield, 96% *ee*].

<sup>1</sup>H NMR (CDCl<sub>3</sub>, 400 MHz): δ 7.24 (dd, *J* = 5.0, 3.0 Hz, 1H, CH<sub>Ar</sub>), 6.98 (ddd, *J* = 3.0, 1.3, 0.5 Hz, 1H, CH<sub>Ar</sub>), 6.98 (dd, *J* = 5.0, 1.3 Hz, 1H, CH<sub>Ar</sub>), 3.24 (dtd, *J* = 9.5, 7.0, 5.0 Hz, 1H, CH), 2.89 (s, 3H, NCH<sub>3</sub>), 2.84 (s, 3H, NCH<sub>3</sub>), 2.56 (dd, *J* = 14.9, 7.0, Hz, 1H, CHHCO), 2.53 (dd, *J* = 14.9, 7.0, Hz, 1H, CHHCO), 1.76 (dq, *J* = 13.3, 7.3, 5.0 Hz, 1H, CHHCH<sub>3</sub>), 1.60 (ddq, *J* = 13.3, 9.5, 7.3 Hz, 1H, CHHCH<sub>3</sub>), 0.82 (t, *J* = 7.4 Hz, 3H, CH<sub>3</sub>CH<sub>2</sub>).

<sup>13</sup>C NMR (CDCl<sub>3</sub>, 100 MHz): δ 172.1, 145.7, 126.9, 125.4, 120.3, 40.3, 39.5, 37.4, 35.6, 29.0, 12.2.

HRMS (ESI+, *m/z*): calcd for C<sub>11</sub>H<sub>18</sub>NOS [M+H]<sup>+</sup>: 212.11036, found: 212.11035.

HPLC: Chiracel-OBH, *n*-heptane/*i*-PrOH 90:10, 0.5 mL/min, 40 °C, detection at 209 nm. Retention time (min): 13.9 (major) and 17.1 (minor).

### Chromatogram

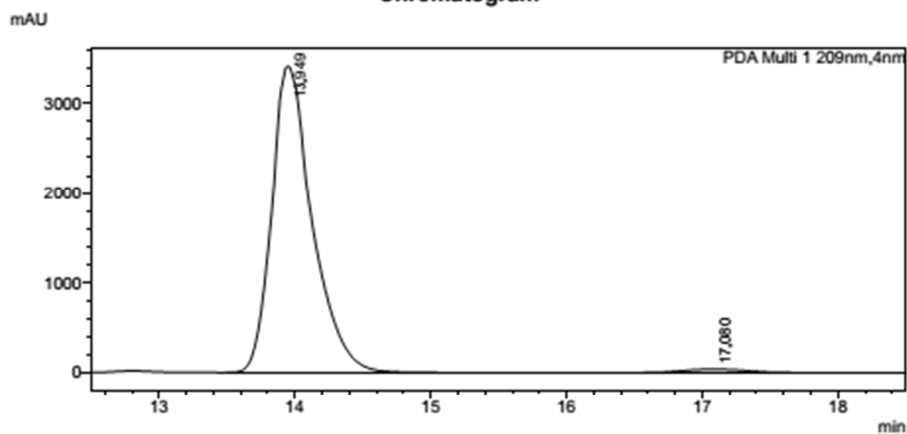

### Peak Table

PDA Ch1 209nm

| Peak# | Ret. Time | Area     | Height  | Conc.  |
|-------|-----------|----------|---------|--------|
| 1     | 13,949    | 70888601 | 3417676 | 98,169 |
| 2     | 17,080    | 1321822  | 40020   | 1,831  |
| Total |           | 72210423 | 3457696 |        |

### Chromatogram

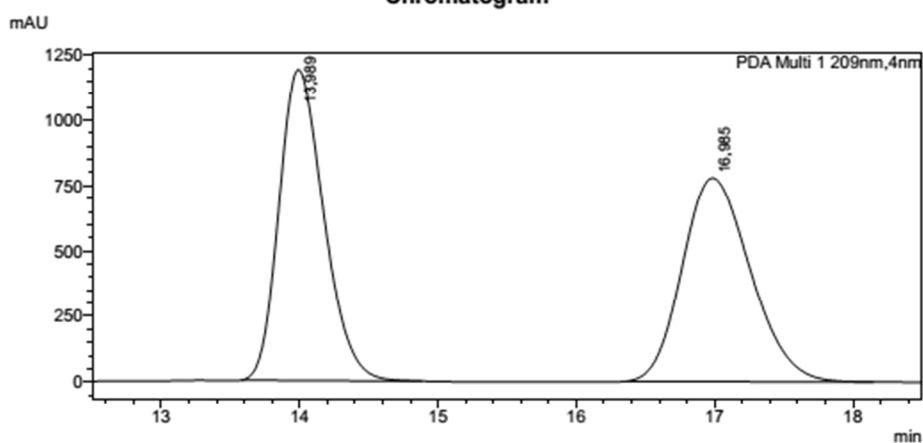

### Peak Table

PDA Ch1 209nm

| Peak# | Ret. Time | Area     | Height  | Conc.  |
|-------|-----------|----------|---------|--------|
| 1     | 13,989    | 26693908 | 1188704 | 50,046 |
| 2     | 16,985    | 26645038 | 778613  | 49,954 |
| Total |           | 53338946 | 1967317 |        |

**(S)-N,N-Dimethyl-3-(3-pyridinyl)pentanamide (2v)**

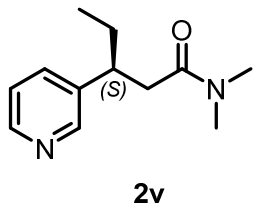

The reaction was performed with 0.1 mmol **1v**, CuBr·SMe<sub>2</sub> (1.03 mg, 0.005 mmol, 5 mol%), ligand **L1** (3.84 mg, 0.006 mmol, 6 mol%), BF<sub>3</sub>·Et<sub>2</sub>O (25 μL, 0.2 mmol), EtMgBr (0.2 mmol, 3.0 M in Et<sub>2</sub>O), 1.0 mL of DCM at -78 °C. Product **2v** was obtained as a colorless oil after column chromatography (SiO<sub>2</sub> previously treated with NEt<sub>3</sub> (10%), Et<sub>2</sub>O:MeOH 30:1) [74% yield, 95% *ee*]. *Note: In this case the reaction was quenched with 2 M NaOH solution.*

<sup>1</sup>H NMR (CDCl<sub>3</sub>, 400 MHz): δ 8.44 (s, 1H, CH<sub>Ar</sub>), 8.41 (d, *J* = 4.8 Hz, 1H, CH<sub>Ar</sub>), 7.51 (dt, *J* = 7.8, 1.9 Hz, 1H, CH<sub>Ar</sub>), 7.19 (dd, *J* = 7.8, 4.8 Hz, 1H, CH<sub>Ar</sub>), 3.11 (dtd, *J* = 9.6, 7.1, 5.2 Hz, 1H, CH), 2.87 (s, 3H, NCH<sub>3</sub>), 2.84 (s, 3H, NCH<sub>3</sub>), 2.59 (dd, *J* = 15.4, 6.7 Hz, 1H, CHHCO), 2.57 (dd, *J* = 15.4, 7.4 Hz, 1H, CHHCO), 1.79 (dq, *J* = 13.6, 7.4, 5.1 Hz, 1H, CHHCH<sub>3</sub>), 1.59 (ddq, *J* = 13.6, 9.6, 7.4 Hz, 1H, CHHCH<sub>3</sub>), 0.77 (t, *J* = 7.4 Hz, 3H, CH<sub>3</sub>CH<sub>2</sub>).

<sup>13</sup>C NMR (CDCl<sub>3</sub>, 100 MHz): δ 171.2, 149.5, 147.9, 140.2, 135.5, 123.5, 41.7, 40.0, 37.4, 35.6, 28.9, 12.1.

HRMS (ESI+, *m/z*): calcd for C<sub>12</sub>H<sub>19</sub>N<sub>2</sub>O [M+H]<sup>+</sup>: 207.14919, found: 207.14865.

HPLC: Chiracel-ODH, *n*-heptane/*i*-PrOH 80:20, 0.5 mL/min, 40 °C, detection at 208 nm. Retention time (min): 13.7 (major) and 15.2 (minor).



### Chromatogram

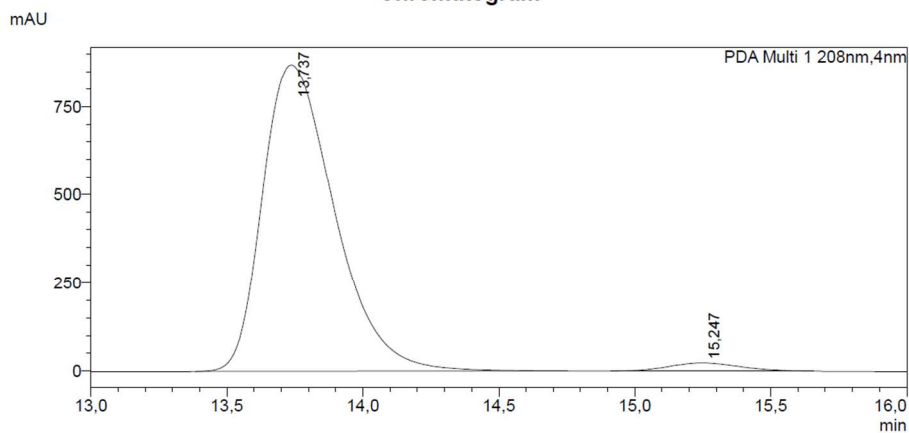

### Peak Table

| PDA Ch1 208nm |           |          |        |        |
|---------------|-----------|----------|--------|--------|
| Peak#         | Ret. Time | Area     | Height | Conc.  |
| 1             | 13.737    | 16026694 | 871396 | 97.451 |
| 2             | 15.247    | 419248   | 22914  | 2.549  |
| Total         |           | 16445942 | 894310 |        |

### Chromatogram

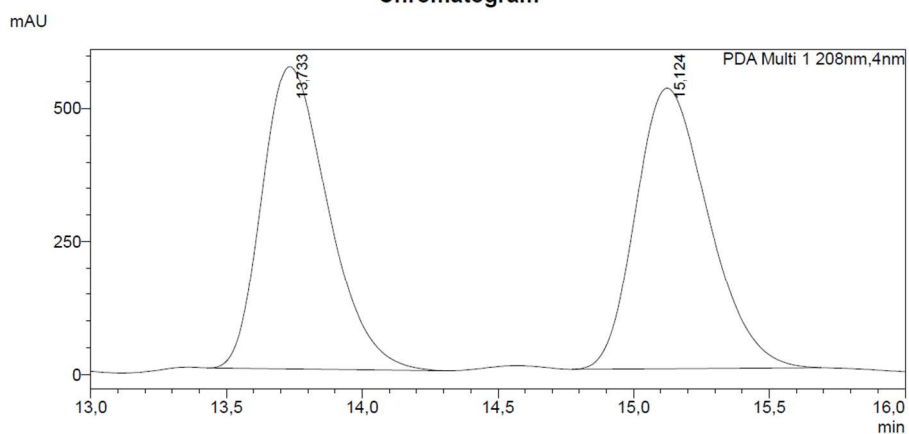

### Peak Table

| PDA Ch1 208nm |           |          |         |        |
|---------------|-----------|----------|---------|--------|
| Peak#         | Ret. Time | Area     | Height  | Conc.  |
| 1             | 13.733    | 9636544  | 568196  | 49.572 |
| 2             | 15.124    | 9802781  | 526242  | 50.428 |
| Total         |           | 19439326 | 1094438 |        |

**(R)-N,N-Dimethyl-6-bromo-3-ethyl-hexanamide (2w)**

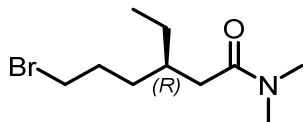

**2w**

The reaction was performed with 0.1 mmol **1w**, CuBrSMe<sub>2</sub> (1.03 mg, 0.005 mmol, 5 mol%), ligand **L1** (3.84 mg, 0.006 mmol, 6 mol%), BF<sub>3</sub>·Et<sub>2</sub>O (25 μL, 0.2 mmol), EtMgBr (0.2 mmol, 3.0 M in Et<sub>2</sub>O), 1.0 mL of DCM at -78 °C. Product **2w** was obtained as a colorless oil after column chromatography (SiO<sub>2</sub>, pentane:Et<sub>2</sub>O 1:1) [76% yield, 97% *ee*].

<sup>1</sup>H NMR (CDCl<sub>3</sub>, 400 MHz): δ 3.40 (dt, *J* = 12.0, 6.8 Hz, 1H, CHHBr), 3.38 (dt, *J* = 12.0, 6.8 Hz, 1H, CHHBr), 3.00 (s, 3H, NCH<sub>3</sub>), 2.94 (s, 3H, NCH<sub>3</sub>), 2.28 (dd, *J* = 15.3, 6.5 Hz, 1H, CHHCO), 2.18 (dd, *J* = 15.3, 7.1 Hz, 1H, CHHCO), 1.97-1.82 (m, 3H, CHCH<sub>2</sub>, CH<sub>2</sub>CH<sub>2</sub>Br), 1.46-1.32 (m, 4H, CH<sub>2</sub>CH<sub>3</sub>, CH<sub>2</sub>CH<sub>2</sub>CH<sub>2</sub>Br), 0.88 (t, *J* = 7.4 Hz, 3H, CH<sub>3</sub>CH<sub>2</sub>).

<sup>13</sup>C NMR (CDCl<sub>3</sub>, 100 MHz): δ 172.6, 37.6, 35.6, 34.3, 32.3, 30.3, 26.5, 11.0.

HRMS (ESI+, *m/z*): calcd for C<sub>10</sub>H<sub>21</sub>BrNO [M+H]<sup>+</sup>: 250.08010, found: 250.08049.

HPLC: Chiracel-ODH, *n*-heptane/*i*-PrOH 95:5, 0.5 mL/min, 40 °C, detection at 207 nm. Retention time (min): 15.1 (major) and 16.7 (minor).

### Chromatogram

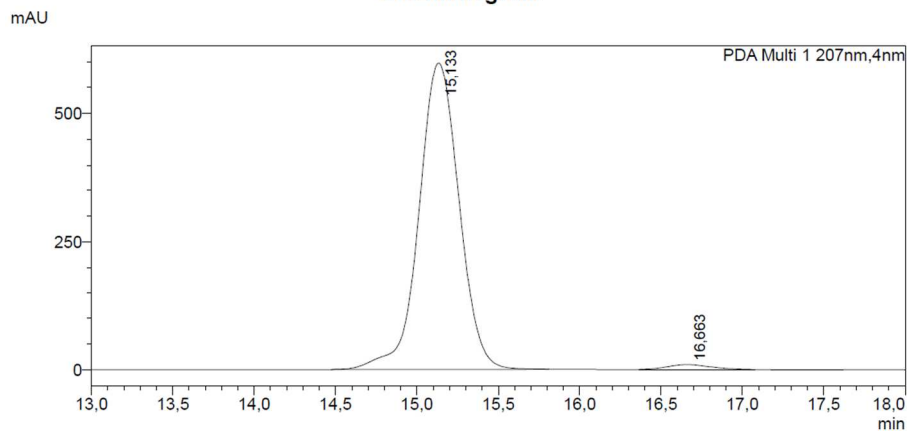

### Peak Table

| PDA Ch1 207nm |           |          |        |        |
|---------------|-----------|----------|--------|--------|
| Peak#         | Ret. Time | Area     | Height | Conc.  |
| 1             | 15.133    | 10258204 | 597629 | 98,303 |
| 2             | 16.663    | 177119   | 9541   | 1,697  |
| Total         |           | 10435323 | 607170 |        |

### Chromatogram

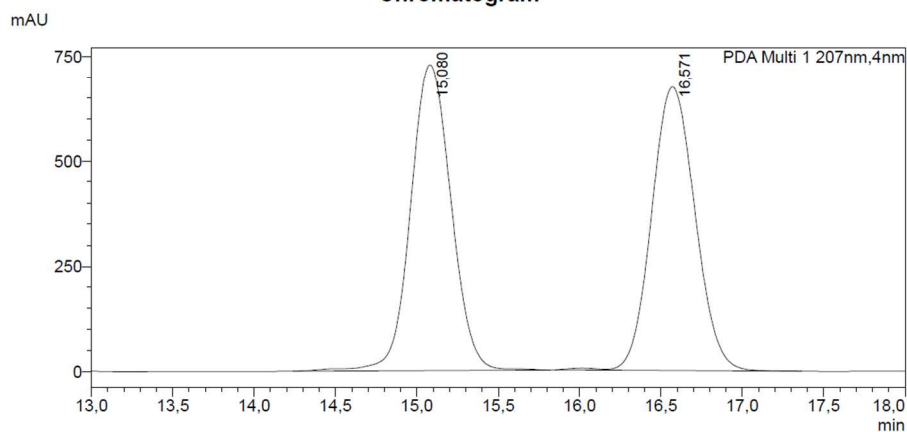

### Peak Table

| PDA Ch1 207nm |           |          |         |        |
|---------------|-----------|----------|---------|--------|
| Peak#         | Ret. Time | Area     | Height  | Conc.  |
| 1             | 15.080    | 12574536 | 727078  | 50,137 |
| 2             | 16.571    | 12505652 | 672469  | 49,863 |
| Total         |           | 25080188 | 1399547 |        |

**(R)-N,N-Dimethyl-6-hydroxy-3-ethyl-hexanamide (2x)**

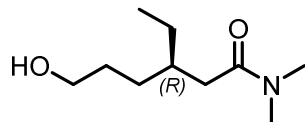

**2x**

The reaction was performed with 0.1 mmol **1x**, CuBr·SMe<sub>2</sub> (1.03 mg, 0.005 mmol, 5 mol%), ligand **L1** (3.84 mg, 0.006 mmol, 6 mol%), TMSOTf (54 μL, 0.3 mmol), EtMgBr (0.3 mmol, 3.0 M in Et<sub>2</sub>O), 1.0 mL of DCM at -50 °C. Product **2x** was obtained as a colorless oil after column chromatography (SiO<sub>2</sub>, Et<sub>2</sub>O:MeOH 30:1) [71% yield, 93% *ee*].

<sup>1</sup>H NMR (CDCl<sub>3</sub>, 400 MHz): δ 3.69-3.58 (m, 2H, CH<sub>2</sub>OH), 3.00 (s, 3H, NCH<sub>3</sub>), 2.93 (s, 3H, NCH<sub>3</sub>), 2.30 (dd, *J* = 15.5, 5.4 Hz, 1H, CHHCO), 2.15 (dd, *J* = 15.5, 8.4 Hz, 1H, CHHCO), 1.93-1.86 (m, 1H, CH), 1.65-1.35 (m, 2H, CH<sub>2</sub>CH<sub>2</sub>OH), 1.46-1.35 (m, 2H, CH<sub>2</sub>CH<sub>2</sub>CH<sub>2</sub>OH), 1.34-1.22 (m, 2H, CH<sub>2</sub>CH<sub>3</sub>), 0.87 (t, *J* = 7.4 Hz, 3H, CH<sub>3</sub>CH<sub>2</sub>).

<sup>13</sup>C NMR (CDCl<sub>3</sub>, 100 MHz): δ 173.2, 62.5, 37.7, 37.5, 35.6, 35.1, 29.7, 29.4, 26.6, 11.2.

HRMS (ESI+, *m/z*): calcd for C<sub>10</sub>H<sub>22</sub>NO<sub>2</sub> [M+H]<sup>+</sup>: 188.16451, found: 188.16425.

HPLC: Chiracel-OJH, *n*-heptane/*i*-PrOH 95:5, 0.5 mL/min, 40 °C, detection at 209 nm. Retention time (min): 16.4 (minor) and 17.3 (major).

### Chromatogram

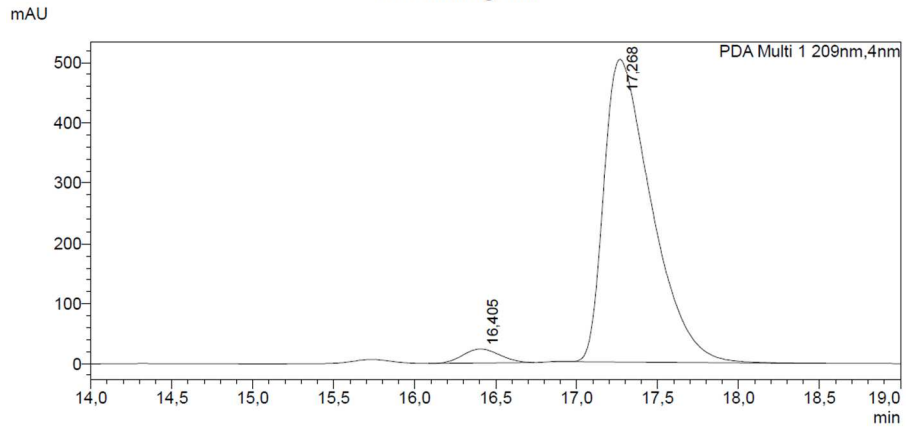

### Peak Table

| PDA Ch1 209nm |           |          |        |        |
|---------------|-----------|----------|--------|--------|
| Peak#         | Ret. Time | Area     | Height | Conc.  |
| 1             | 16,405    | 366220   | 23060  | 3,440  |
| 2             | 17,268    | 10279931 | 502723 | 96,560 |
| Total         |           | 10646151 | 525783 |        |

### Chromatogram

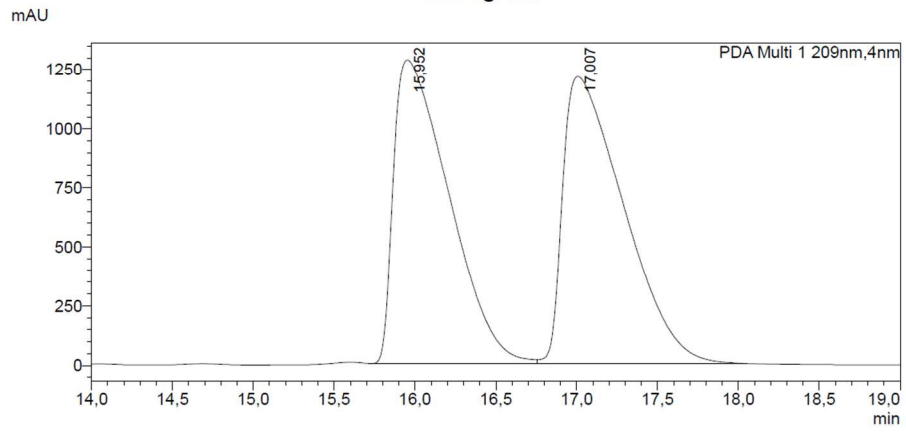

### Peak Table

| PDA Ch1 209nm |           |          |         |        |
|---------------|-----------|----------|---------|--------|
| Peak#         | Ret. Time | Area     | Height  | Conc.  |
| 1             | 15,952    | 30543999 | 1282872 | 49,095 |
| 2             | 17,007    | 31670290 | 1211003 | 50,905 |
| Total         |           | 62214289 | 2493875 |        |

**(R)-N,N-Dimethyl-3-cyclopentyl-hexanamide (3a)**

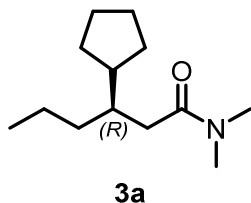

The reaction was performed with 0.2 mmol **1a**, CuBrSMe<sub>2</sub> (2.06 mg, 0.01 mmol, 5 mol%), ligand **L1** (7.68 mg, 0.012 mmol, 6 mol%), TMSOTf (72 μL, 0.4 mmol), cyclopentylMgBr (0.4 mmol, 2.0 M in Et<sub>2</sub>O), 2.0 mL of DCM at -50 °C. Product **3a** was obtained as a colorless oil after column chromatography (SiO<sub>2</sub>, pentane:Et<sub>2</sub>O 2:1) [78% yield, 87% *ee*].

<sup>1</sup>H NMR (CDCl<sub>3</sub>, 400 MHz): δ 3.01 (s, 3H, NCH<sub>3</sub>), 2.93 (s, 3H, NCH<sub>3</sub>), 2.28 (dd, *J* = 15.2, 5.6 Hz, 1H, CHHCO), 2.22 (dd, *J* = 15.2, 7.5 Hz, 1H, CHHCO), 1.96-1.44 (m, 8H, CHCH<sub>2</sub>, CH<sub>2</sub>), 1.38-1.09 (m, 6H, CH<sub>2</sub>), 0.87 (t, *J* = 6.9 Hz, 3H, CH<sub>3</sub>CH<sub>2</sub>).

<sup>13</sup>C NMR (CDCl<sub>3</sub>, 100 MHz): δ 173.3, 43.9, 39.1, 37.6, 36.4, 35.6, 35.1, 30.1, 30.0, 25.6, 25.5, 19.8, 14.7.

HRMS (ESI+, *m/z*): calcd for C<sub>13</sub>H<sub>26</sub>NO [M+H]<sup>+</sup>: 212.20089, found: 212.20077.

HPLC: Chiracel-OZH, *n*-heptane/*i*-PrOH 98:2, 0.5 mL/min, 40 °C, detection at 205 nm. Retention time (min): 36.2 (minor) and 38.8 (major).

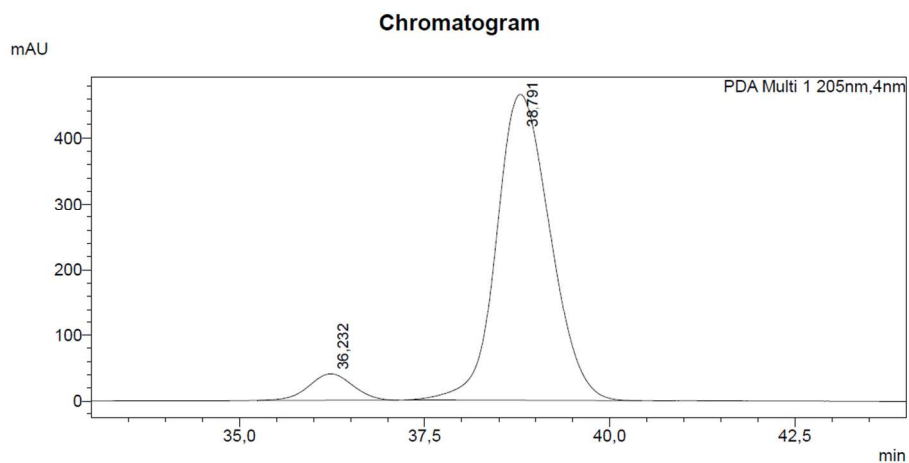

**Peak Table**

| PDA Ch1 205nm |           |          |        |        |
|---------------|-----------|----------|--------|--------|
| Peak#         | Ret. Time | Area     | Height | Conc.  |
| 1             | 36,232    | 1642501  | 39917  | 6,554  |
| 2             | 38,791    | 23418422 | 465250 | 93,446 |
| Total         |           | 25060923 | 505167 |        |

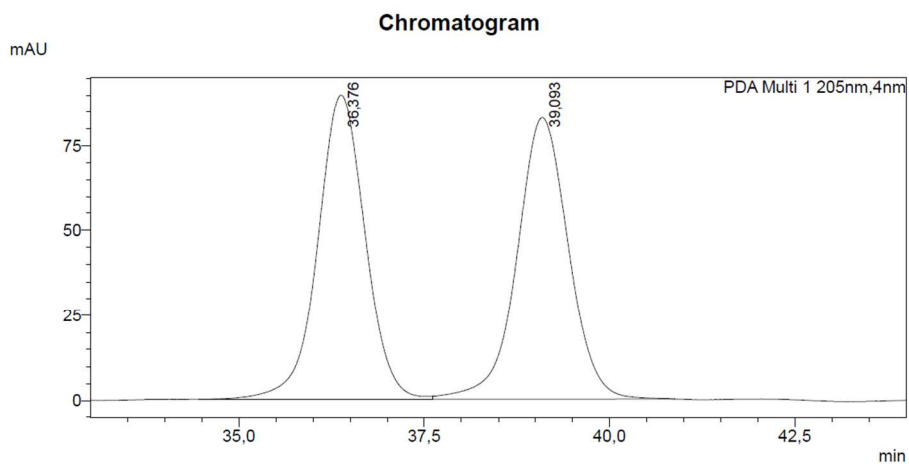

**Peak Table**

| PDA Ch1 205nm |           |         |        |        |
|---------------|-----------|---------|--------|--------|
| Peak#         | Ret. Time | Area    | Height | Conc.  |
| 1             | 36,376    | 3988931 | 89780  | 49,854 |
| 2             | 39,093    | 4012230 | 82857  | 50,146 |
| Total         |           | 8001161 | 172638 |        |

**(S)-N,N-Dimethyl-5-methyl-3-propyl-hexanamide (3b)**

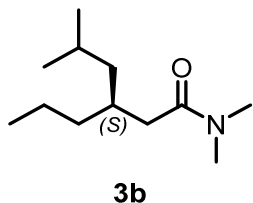

The reaction was performed with 0.2 mmol **1a**, CuBrSMe<sub>2</sub> (2.06 mg, 0.01 mmol, 5 mol%), ligand **L1** (7.68 mg, 0.012 mmol, 6 mol%), TMSOTf (72 μL, 0.4 mmol), cyclopentylMgBr (0.4 mmol, 2.0 M in Et<sub>2</sub>O), 2.0 mL of DCM at -50 °C. Product **3b** was obtained as a colorless oil after column chromatography (SiO<sub>2</sub>, pentane:Et<sub>2</sub>O 2:1) [84% yield, 95% *ee*].

<sup>1</sup>H NMR (CDCl<sub>3</sub>, 400 MHz): δ 2.99 (s, 3H, NCH<sub>3</sub>), 2.93 (s, 3H, NCH<sub>3</sub>), 2.22 (dd, *J* = 15.1, 7.3 Hz, 1H, CHHCO), 2.17 (dd, *J* = 15.1, 6.4 Hz, 1H, CHHCO), 2.03-1.93 (m, 1H, CH<sub>3</sub>CH<sub>2</sub>CH<sub>2</sub>CH), 1.67-1.59 (dhept, *J*=13.3, 6.6 Hz, 1H, CH<sub>3</sub>CH), 1.34-1.21 (m, 4H, CH<sub>3</sub>CH<sub>2</sub>, CH<sub>3</sub>CH<sub>2</sub>CH<sub>2</sub>), 1.19-1.04 (m, 2H, CH<sub>3</sub>CHCH<sub>2</sub>), 0.87 (t, *J* = 6.9 Hz, 3H, CH<sub>3</sub>CH<sub>2</sub>), 0.87 (d, *J* = 6.6 Hz, 3H, CH<sub>3</sub>CH), 0.86 (d, *J* = 6.6 Hz, 3H, CH<sub>3</sub>CH).

<sup>13</sup>C NMR (CDCl<sub>3</sub>, 100 MHz): δ 173.1, 44.1, 38.6, 37.6, 36.8, 35.6, 32.5, 25.5, 23.1, 22.9, 19.7, 14.6.

HRMS (ESI+, *m/z*): calcd for C<sub>12</sub>H<sub>26</sub>NO [M+H]<sup>+</sup>: 200.20089, found: 200.20066.

HPLC: Chiracel-ADH, *n*-heptane/*i*-PrOH 95.5:0.5, 0.5 mL/min, 40 °C, detection at 219 nm. Retention time (min): 45.5 (major) and 49.2 (minor).



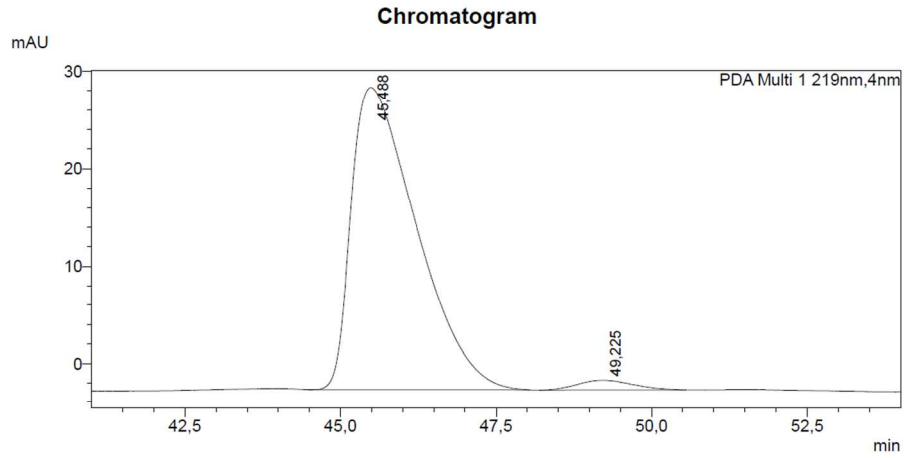

**Peak Table**

PDA Ch1 219nm

| Peak# | Ret. Time | Area    | Height | Conc.  |
|-------|-----------|---------|--------|--------|
| 1     | 45.488    | 2263494 | 30996  | 97.365 |
| 2     | 49.225    | 61265   | 1002   | 2.635  |
| Total |           | 2324759 | 31998  |        |

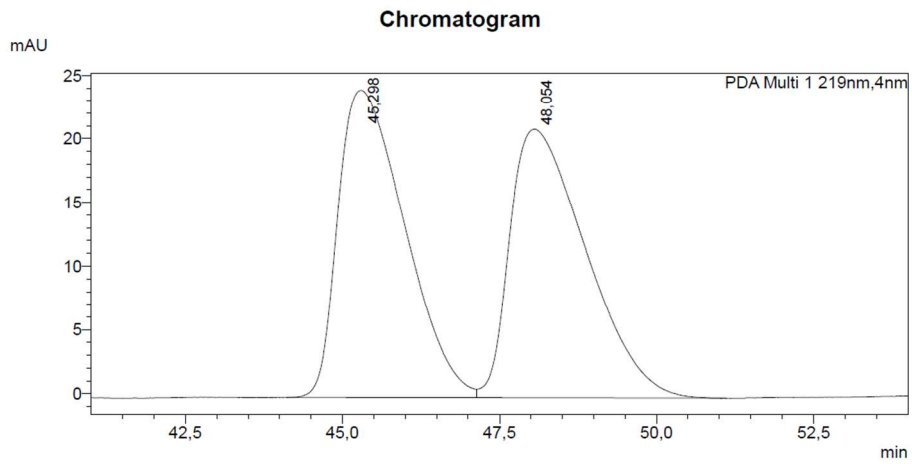

**Peak Table**

PDA Ch1 219nm

| Peak# | Ret. Time | Area    | Height | Conc.  |
|-------|-----------|---------|--------|--------|
| 1     | 45.298    | 1780403 | 24126  | 50.090 |
| 2     | 48.054    | 1774024 | 21055  | 49.910 |
| Total |           | 3554427 | 45181  |        |

**(S)-N,N-Dimethyl-6-methy-3-propyl-heptanamide (3c)**

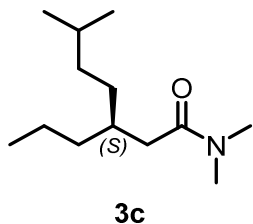

The reaction was performed with 0.2 mmol **1a**, CuBr·SMe<sub>2</sub> (2.06 mg, 0.01 mmol, 5 mol%), ligand **L1** (7.68 mg, 0.012 mmol, 6 mol%), BF<sub>3</sub>·Et<sub>2</sub>O (50 μL, 0.4 mmol), *i*-pentylMgBr (0.4 mmol, 2.0 M in Et<sub>2</sub>O), 2.0 mL of DCM at -78 °C. Product **3c** was obtained as a colorless oil after column chromatography (SiO<sub>2</sub>, pentane:Et<sub>2</sub>O 2:1) [77% yield, 97% *ee*].

<sup>1</sup>H NMR (CDCl<sub>3</sub>, 400 MHz): δ 2.99 (s, 3H, NCH<sub>3</sub>), 2.93 (s, 3H, NCH<sub>3</sub>), 2.21 (d, *J* = 6.9 Hz, 2H, CH<sub>2</sub>CO), 1.94-1.84 (m, 1H, CH<sub>3</sub>CH<sub>2</sub>CH<sub>2</sub>CH), 1.52-1.41 (m, 1H, CH<sub>3</sub>CH), 1.34-1.19 (m, 6H, CH<sub>2</sub>), 1.17-1.11 (m, 2H, CH<sub>3</sub>CHCH<sub>2</sub>), 0.87 (t, *J* = 6.7 Hz, 3H, CH<sub>3</sub>CH<sub>2</sub>), 0.85 (d, *J* = 6.6 Hz, 6H, CH<sub>3</sub>CH).

<sup>13</sup>C NMR (CDCl<sub>3</sub>, 100 MHz): δ 173.1, 38.2, 37.6, 36.4, 35.9, 35.6, 34.9, 31.8, 28.4, 22.8, 22.7, 19.9, 14.5.

HRMS (ESI+, *m/z*): calcd for C<sub>13</sub>H<sub>28</sub>NO [M+H]<sup>+</sup>: 214.21654, found: 214.21645.

HPLC: Chiracel-ODH, *n*-heptane/*i*-PrOH 98:2, 0.5 mL/min, 40 °C, detection at 206 nm. Retention time (min): 12.7 (major) and 13.5 (minor).

### Chromatogram

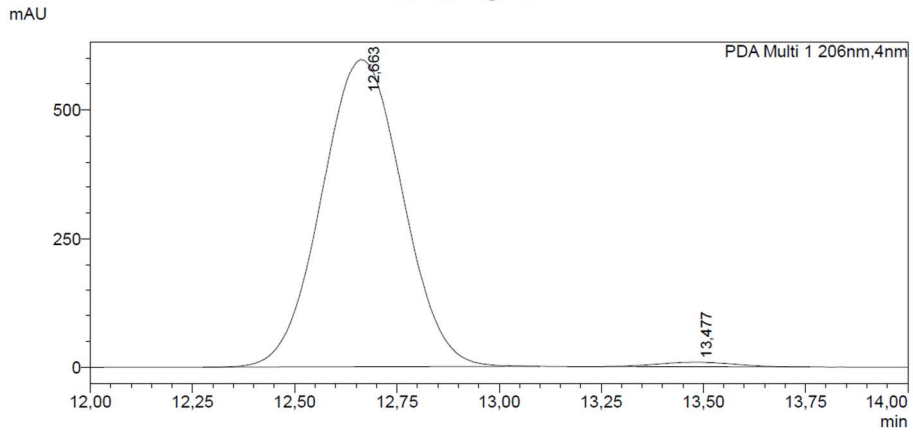

### Peak Table

| PDA Ch1 206nm |           |         |        |        |
|---------------|-----------|---------|--------|--------|
| Peak#         | Ret. Time | Area    | Height | Conc.  |
| 1             | 12.663    | 8225074 | 597393 | 98,620 |
| 2             | 13.477    | 115054  | 8816   | 1,380  |
| Total         |           | 8340128 | 606210 |        |

### Chromatogram

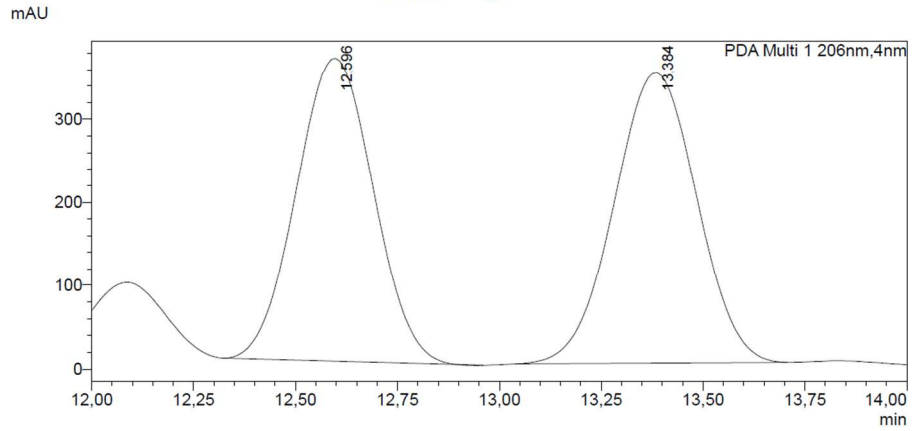

### Peak Table

| PDA Ch1 206nm |           |         |        |        |
|---------------|-----------|---------|--------|--------|
| Peak#         | Ret. Time | Area    | Height | Conc.  |
| 1             | 12.596    | 4779960 | 364348 | 49,311 |
| 2             | 13.384    | 4913457 | 348288 | 50,689 |
| Total         |           | 9693417 | 712637 |        |

**(S)-N,N-Dimethyl-3-phenethylhexanamide (3d)**

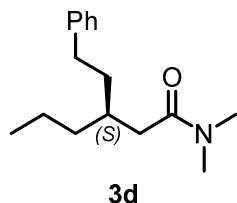

The reaction was performed with 0.2 mmol **1a**, CuBrSMe<sub>2</sub> (2.06 mg, 0.01 mmol, 5 mol%), ligand **L1** (7.68 mg, 0.012 mmol, 6 mol%), BF<sub>3</sub>·Et<sub>2</sub>O (50 μL, 0.4 mmol), phenylethylMgBr (0.4 mmol, 2.6 M in Et<sub>2</sub>O), 2.0 mL of DCM at -78 °C. Product **3d** was obtained as a orange oil after column chromatography (SiO<sub>2</sub>, pentane:Et<sub>2</sub>O 1:1) [73% yield, 97% *ee*].

<sup>1</sup>H NMR (CDCl<sub>3</sub>, 400 MHz): δ 7.28-7.25 (m, 2H, CH<sub>Ar</sub>), 7.19-7.14 (m, 3H, CH<sub>Ar</sub>), 2.96 (s, 3H, NCH<sub>3</sub>), 2.94 (s, 3H, NCH<sub>3</sub>), 2.67-2.55 (m, 2H, CH<sub>2</sub>Ph), 2.30 (dd, *J* = 15.9, 7.0 Hz, 1H, CHHCO), 2.28 (dd, *J* = 15.9, 6.8 Hz, 1H, CHHCO), 2.07-1.97 (m, 1H, CH), 1.66-1.60 (m, 2H, CH<sub>2</sub>CH<sub>3</sub>), 1.38-1.28 (m, 4H, CH<sub>2</sub>CH<sub>2</sub>CH<sub>3</sub> and CH<sub>2</sub>CH<sub>2</sub>Ph), 0.90 (t, *J* = 6.9 Hz, 3H, CH<sub>3</sub>CH<sub>2</sub>).

<sup>13</sup>C NMR (CDCl<sub>3</sub>, 100 MHz): δ 172.8, 142.9, 128.5, 128.4, 125.8, 38.2, 37.6, 36.4, 36.0, 35.6, 34.6, 33.3, 19.9, 14.6.

HRMS (ESI+, *m/z*): calcd for C<sub>16</sub>H<sub>26</sub>NO [M+H]<sup>+</sup>: 248.20089, found: 248.20103.

HPLC: Chiracel-OJH, *n*-heptane/*i*-PrOH 95:5, 0.5 mL/min, 40 °C, detection at 210 nm. Retention time (min): 12.8 (major) and 13.8 (minor).

### Chromatogram

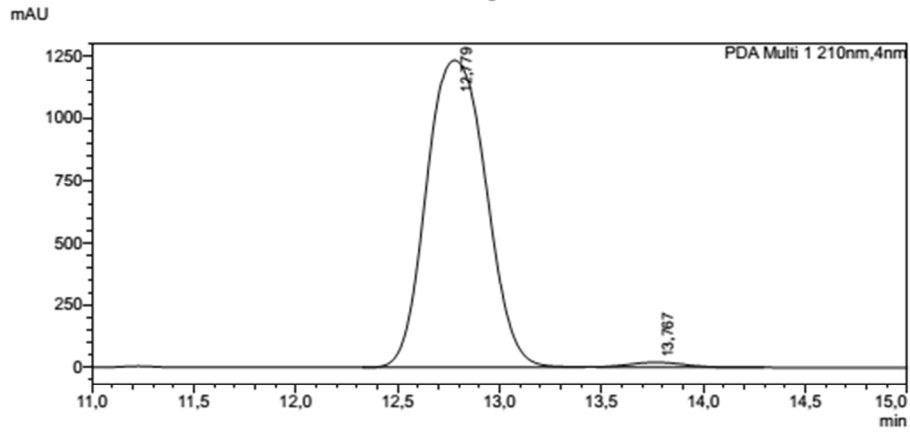

### Peak Table

| PDA Ch1 210nm |           |          |         |        |
|---------------|-----------|----------|---------|--------|
| Peak#         | Ret. Time | Area     | Height  | Conc.  |
| 1             | 12.779    | 24992848 | 1230790 | 98,622 |
| 2             | 13.767    | 349340   | 19382   | 1,378  |
| Total         |           | 25342188 | 1250172 |        |

### Chromatogram

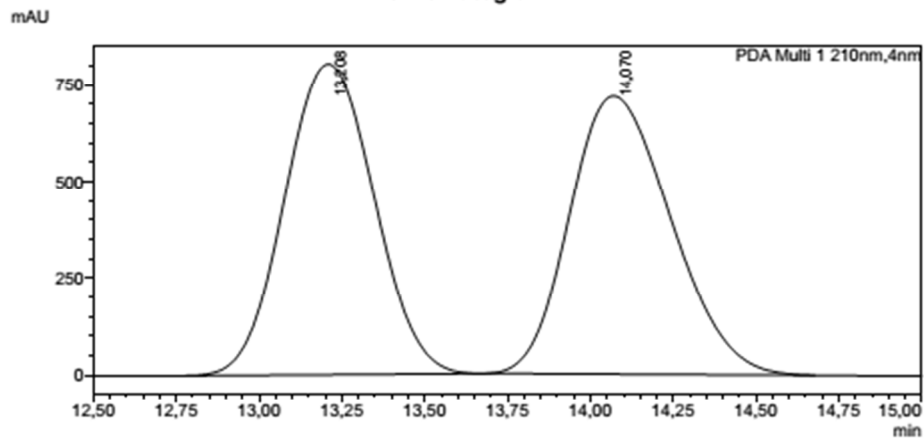

### Peak Table

| PDA Ch1 210nm |           |          |         |        |
|---------------|-----------|----------|---------|--------|
| Peak#         | Ret. Time | Area     | Height  | Conc.  |
| 1             | 13.208    | 15054037 | 802655  | 49,697 |
| 2             | 14.070    | 15237642 | 717338  | 50,303 |
| Total         |           | 30291679 | 1519993 |        |

**(S)-N,N-Dimethyl-3-propyl-oct-7-enamide (3e)**

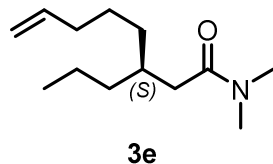

The reaction was performed with 0.2 mmol **1a**, CuBrSMe<sub>2</sub> (2.06 mg, 0.01 mmol, 5 mol%), ligand **L1** (7.68 mg, 0.012 mmol, 6 mol%), BF<sub>3</sub>·Et<sub>2</sub>O (50 μL, 0.4 mmol), pent-4-en-1-ylMgBr (0.4 mmol, 1.7 M in Et<sub>2</sub>O), 2.0 mL of DCM at -78 °C. Product **3e** was obtained as a colorless oil after column chromatography (SiO<sub>2</sub>, pentane:Et<sub>2</sub>O 1:1) [80% yield, 97% *ee*].

<sup>1</sup>H NMR (CDCl<sub>3</sub>, 400 MHz): δ 5.79 (ddt, *J* = 17.1, 10.3, 6.7 Hz, 1H, CH=CH<sub>2</sub>), 4.97 (dc, *J* = 17.1, 1.9 Hz, 1H, CH=CHH), 4.91 (ddt, *J* = 10.3, 2.0, 1.1 Hz, 1H, CH=CHH), 2.99 (s, 3H, NCH<sub>3</sub>), 2.93 (s, 3H, NCH<sub>3</sub>), 2.23 (dd, *J* = 15.4, 6.9 Hz, 1H, CHHCO), 2.19 (dd, *J* = 15.4, 6.9 Hz, 1H, CHHCO), 2.05-1.99 (m, 2H, CH<sub>2</sub>CH=CH<sub>2</sub>), 1.97-1.90 (m, 1H, CHCH<sub>2</sub>CO), 1.41-1.24 (m, 8H, CH<sub>2</sub>), 0.87 (t, *J* = 6.6 Hz, 3H, CH<sub>3</sub>CH<sub>2</sub>).

<sup>13</sup>C NMR (CDCl<sub>3</sub>, 100 MHz): δ 173.0, 139.1, 114.4, 38.2, 37.6, 36.4, 35.6, 34.6, 34.2, 33.6, 26.1, 19.9, 14.5.

HRMS (ESI+, *m/z*): calcd for C<sub>13</sub>H<sub>26</sub>NO [M+H]<sup>+</sup>: 212.20089, found: 212.20081.

HPLC: Chiracel-OBH, *n*-heptane/*i*-PrOH 99.7:0.3, 0.5 mL/min, 40 °C, detection at 215 nm. Retention time (min): 40.8 (major) and 45.9 (minor).

### Chromatogram

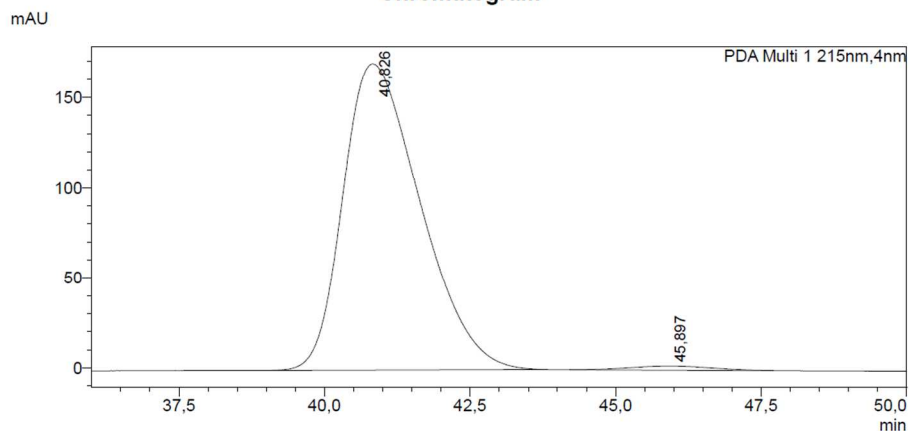

### Peak Table

| PDA Ch1 215nm |           |          |        |        |
|---------------|-----------|----------|--------|--------|
| Peak#         | Ret. Time | Area     | Height | Conc.  |
| 1             | 40.826    | 15705271 | 169852 | 98,618 |
| 2             | 45.897    | 220089   | 2241   | 1,382  |
| Total         |           | 15925360 | 172093 |        |

### Chromatogram

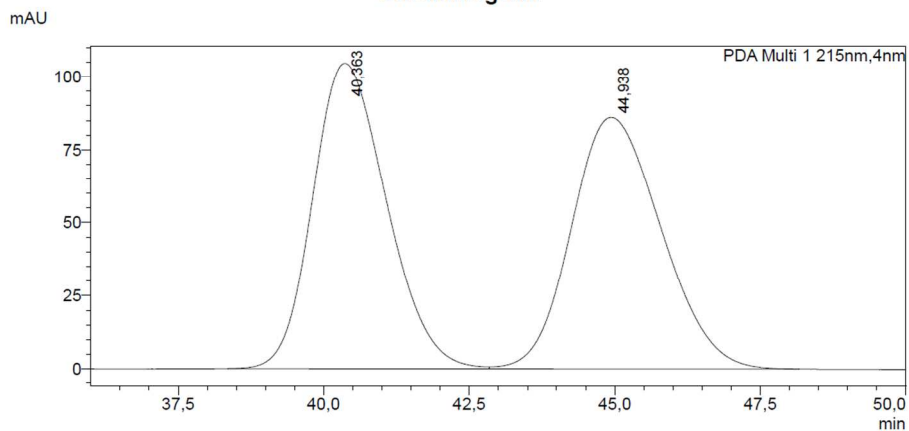

### Peak Table

| PDA Ch1 215nm |           |          |        |        |
|---------------|-----------|----------|--------|--------|
| Peak#         | Ret. Time | Area     | Height | Conc.  |
| 1             | 40.363    | 9207269  | 104536 | 49,937 |
| 2             | 44.938    | 9230333  | 86039  | 50,063 |
| Total         |           | 18437601 | 190575 |        |

**(S)-N,N-Dimethyl-3-propyl-nonanamide (3f)**

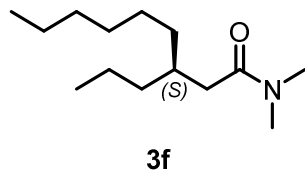

The reaction was performed with 0.2 mmol **1a**, CuBr·SMe<sub>2</sub> (2.06 mg, 0.01 mmol, 5 mol%), ligand **L1** (7.68 mg, 0.012 mmol, 6 mol%), BF<sub>3</sub>·Et<sub>2</sub>O (50 μL, 0.4 mmol), HexMgBr (0.4 mmol, 2.0 M in Et<sub>2</sub>O), 2.0 mL of DCM at -78 °C. Product **3f** was obtained as a colorless oil after column chromatography (SiO<sub>2</sub>, pentane:Et<sub>2</sub>O 1:1) [82% yield, 97% *ee*].

<sup>1</sup>H NMR (CDCl<sub>3</sub>, 400 MHz): δ 2.99 (s, 3H, NCH<sub>3</sub>), 2.93 (s, 3H, NCH<sub>3</sub>), 2.21 (d, *J* = 6.9 Hz, 2H, CH<sub>2</sub>CO), 1.92-1.89 (m, 1H, CH), 1.32-1.17 (m, 14H, CH<sub>2</sub>), 0.87 (t, *J* = 6.6 Hz, 3H, CH<sub>3</sub>), 0.86 (t, *J* = 6.9 Hz, 3H, CH<sub>3</sub>).

<sup>13</sup>C NMR (CDCl<sub>3</sub>, 100 MHz): δ 173.1, 38.2, 37.6, 36.5, 35.6, 34.8, 34.1, 32.0, 29.8, 26.7, 22.8, 19.9, 14.5, 14.2.

HRMS (ESI+, *m/z*): calcd for C<sub>14</sub>H<sub>30</sub>NO [M+H]<sup>+</sup>: 228.23219, found: 228.23209.

HPLC: Chiracel-ODH, *n*-heptane/*i*-PrOH 98:2, 0.5 mL/min, 40 °C, detection at 206 nm. Retention time (min): 12.7 (major) and 13.5 (minor).



### Chromatogram

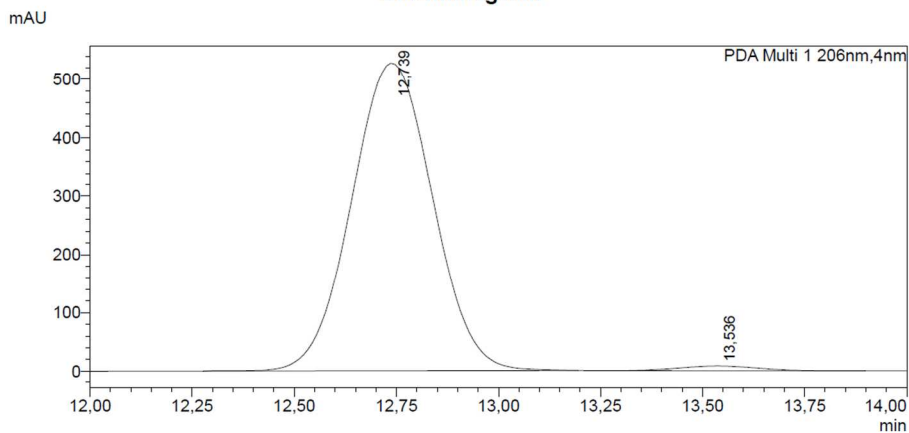

### Peak Table

| PDA Ch1 206nm |           |         |        |        |
|---------------|-----------|---------|--------|--------|
| Peak#         | Ret. Time | Area    | Height | Conc.  |
| 1             | 12.739    | 7280697 | 526858 | 98,531 |
| 2             | 13.536    | 108550  | 8152   | 1,469  |
| Total         |           | 7389247 | 535011 |        |

### Chromatogram

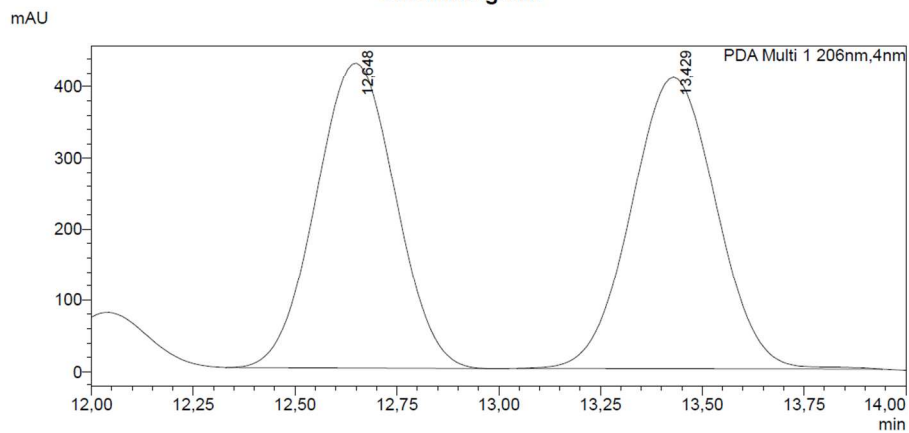

### Peak Table

| PDA Ch1 206nm |           |          |        |        |
|---------------|-----------|----------|--------|--------|
| Peak#         | Ret. Time | Area     | Height | Conc.  |
| 1             | 12.648    | 5800398  | 429019 | 49,462 |
| 2             | 13.429    | 5926658  | 408653 | 50,538 |
| Total         |           | 11727056 | 837672 |        |

**(S)-N,N-Dimethyl-7-chloro-3-propyl-heptanamide (3g)**

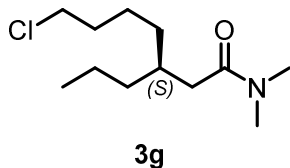

The reaction was performed with 0.2 mmol **1a**, CuBrSMe<sub>2</sub> (2.06 mg, 0.01 mmol, 5 mol%), ligand **L1** (7.68 mg, 0.012 mmol, 6 mol%), BF<sub>3</sub>·Et<sub>2</sub>O (50 μL, 0.4 mmol), (4-chlorobutyl)MgBr (0.4 mmol, 1.3 M in Et<sub>2</sub>O), 2.0 mL of DCM at -78 °C. Product **3g** was obtained as a colorless oil after column chromatography (SiO<sub>2</sub>, pentane:Et<sub>2</sub>O 1:1) [41% yield, 98% *ee*].

<sup>1</sup>H NMR (CDCl<sub>3</sub>, 400 MHz): δ 3.54 (t, *J* = 6.6 Hz, 2H, CH<sub>2</sub>Cl), 3.01 (s, 3H, NCH<sub>3</sub>), 2.95 (s, 3H, NCH<sub>3</sub>), 2.26 (dd, *J* = 15.2, 6.7 Hz, 1H, CHHCO), 2.20 (dd, *J* = 15.2, 7.0 Hz, 1H, CHHCO), 1.98-1.94 (m, 1H, CH), 1.80-1.73 (m, 2H, CH<sub>2</sub>CH<sub>2</sub>Cl), 1.48-1.40 (m, 2H, CH<sub>2</sub>CH<sub>2</sub>CH<sub>2</sub>Cl), 1.35-1.25 (m, 6H, CH<sub>2</sub>), 0.89 (t, *J* = 6.7 Hz, 3H, CH<sub>3</sub>CH<sub>2</sub>).

<sup>13</sup>C NMR (CDCl<sub>3</sub>, 100 MHz): δ 172.9, 45.2, 38.0, 37.6, 36.4, 35.6, 34.5, 33.3, 32.9, 24.0, 19.9, 14.5.

HRMS (ESI+, *m/z*): calcd for C<sub>12</sub>H<sub>25</sub>ClNO [M+H]<sup>+</sup>: 234.16192, found: 234.16222.

HPLC: Chiracel-ODH, *n*-heptane/*i*-PrOH 99.5:0.5, 0.5 mL/min, 40 °C, detection at 216 nm. Retention time (min): 70.4 (major) and 77.1 (minor).

### Chromatogram

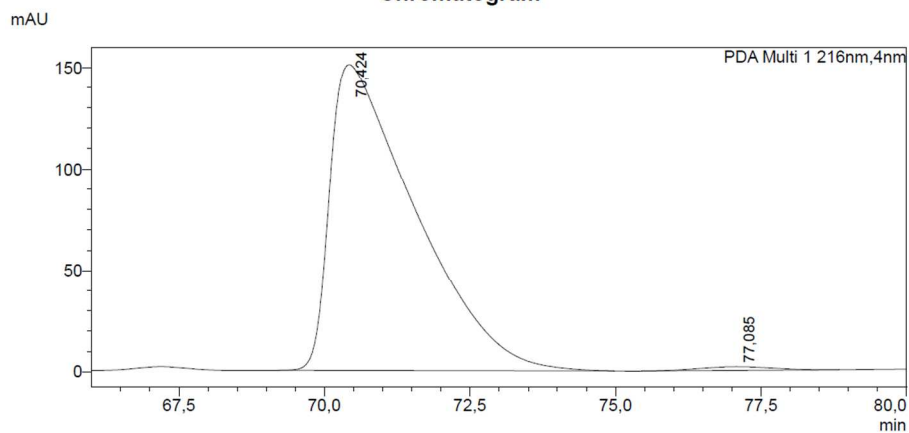

### Peak Table

| PDA Ch1 216nm |           |          |        |        |
|---------------|-----------|----------|--------|--------|
| Peak#         | Ret. Time | Area     | Height | Conc.  |
| 1             | 70.424    | 15401682 | 150739 | 98,980 |
| 2             | 77.085    | 158655   | 1816   | 1,020  |
| Total         |           | 15560338 | 152556 |        |

### Chromatogram

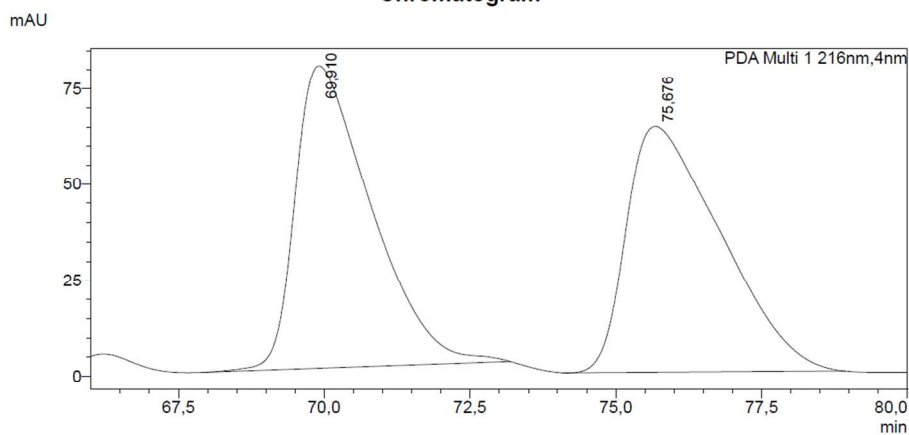

### Peak Table

| PDA Ch1 216nm |           |          |        |        |
|---------------|-----------|----------|--------|--------|
| Peak#         | Ret. Time | Area     | Height | Conc.  |
| 1             | 69.910    | 7161957  | 79017  | 49,771 |
| 2             | 75.676    | 7227734  | 64129  | 50,229 |
| Total         |           | 14389691 | 143145 |        |

**(R)-N,N-Dimethyl-3-methyl-hexanamide (3h)**

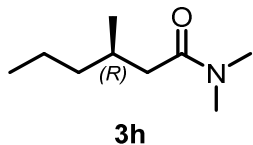

The reaction was performed with 0.2 mmol **1a**, CuBrSMe<sub>2</sub> (2.06 mg, 0.01 mmol, 5 mol%), ligand **L1** (7.68 mg, 0.012 mmol, 6 mol%), TMSOTf (72 μL, 0.4 mmol), MeMgBr (0.4 mmol, 3.0 M in Et<sub>2</sub>O), 2.0 mL of DCM at -50 °C. Product **3h** was obtained as a colorless oil after column chromatography (SiO<sub>2</sub>, pentane:Et<sub>2</sub>O 1:1) [93% yield, 99% *ee*]. *Note: different temperatures and reactions scales, LA have been tried providing the corresponding product with nearly similar outcome. For details see Table S2 , entries 13, 14, 17, 20, 23*

<sup>1</sup>H NMR (CDCl<sub>3</sub>, 400 MHz): δ 3.00 (s, 3H, NCH<sub>3</sub>), 2.95 (s, 3H, NCH<sub>3</sub>), 2.29 (dd, *J* = 14.6, 5.8 Hz, 1H, CHHCO), 2.12 (dd, *J* = 14.6, 8.1 Hz, 1H, CHHCO), 2.05-1.97 (m, 1H, CHCH<sub>2</sub>), 1.43-1.24 (m, 3H, CH<sub>2</sub>CH<sub>3</sub>, CHHCH<sub>2</sub>CH<sub>3</sub>), 1.19-1.10 (m, 1H, CHHCH<sub>2</sub>CH<sub>3</sub>), 0.93 (d, *J* = 6.6 Hz, 3H, CH<sub>3</sub>CH), 0.89 (t, *J* = 7.0 Hz, 3H, CH<sub>3</sub>CH<sub>2</sub>).

<sup>13</sup>C NMR (CDCl<sub>3</sub>, 100 MHz): δ 172.9, 40.8, 39.5, 37.6, 35.5, 30.2, 20.3, 20.0, 14.4.

HRMS (ESI+, *m/z*): calcd for C<sub>9</sub>H<sub>20</sub>NO [M+H]<sup>+</sup>: 158.15394, found: 158.15384.

HPLC: Chiracel-OBH, *n*-heptane/*i*-PrOH 90:10, 0.5 mL/min, 40 °C, detection at 206 nm. Retention time (min): 9.1 (minor) and 10.2 (major).

### Chromatogram

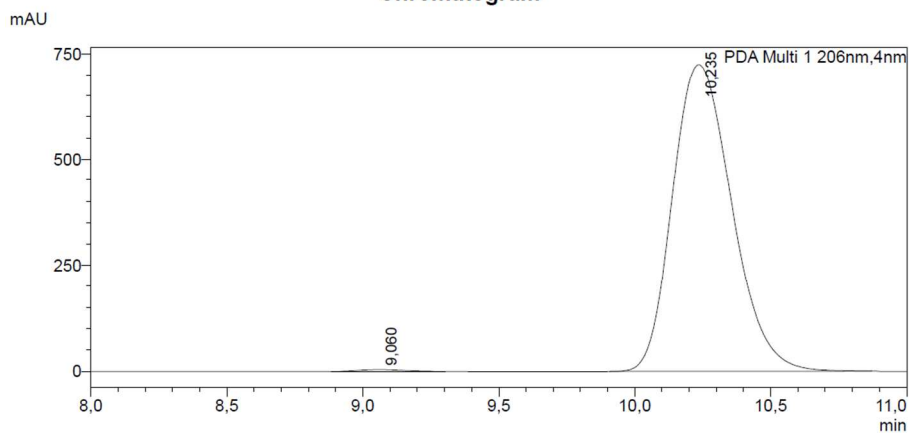

### Peak Table

| PDA Ch1 206nm |           |          |        |        |
|---------------|-----------|----------|--------|--------|
| Peak#         | Ret. Time | Area     | Height | Conc.  |
| 1             | 9.060     | 47641    | 4345   | 0.432  |
| 2             | 10.235    | 10974951 | 724084 | 99.568 |
| Total         |           | 11022592 | 728429 |        |

### Chromatogram

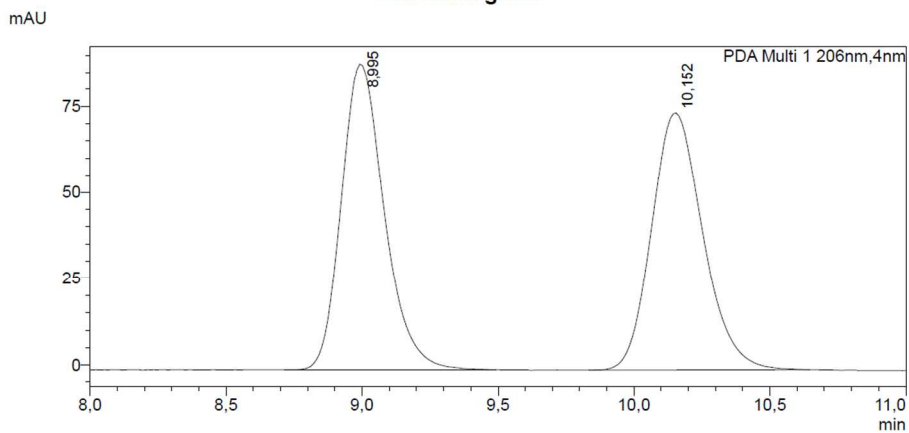

### Peak Table

| PDA Ch1 206nm |           |         |        |        |
|---------------|-----------|---------|--------|--------|
| Peak#         | Ret. Time | Area    | Height | Conc.  |
| 1             | 8.995     | 972588  | 88794  | 49.971 |
| 2             | 10.152    | 973703  | 74508  | 50.029 |
| Total         |           | 1946291 | 163302 |        |

**(S)-N,N-Dimethyl-3-(4-(trifluoromethyl)phenyl)butanamide (3i)**

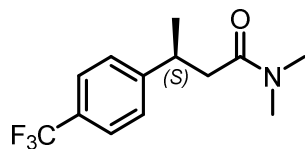

**3i**

The reaction was performed with 0.1 mmol **1o**, CuBr·SMe<sub>2</sub> (1.03 mg, 0.005 mmol, 5 mol%), ligand **L1** (3.84 mg, 0.006 mmol, 6 mol%), BF<sub>3</sub>·Et<sub>2</sub>O (25 μL, 0.2 mmol), MeMgBr (0.2 mmol, 3.0 M in Et<sub>2</sub>O), 1.0 mL of DCM at -78 °C. Product **3i** was obtained as a colorless oil after column chromatography (SiO<sub>2</sub>, Et<sub>2</sub>O) [54% yield, 99% *ee*].

<sup>1</sup>H NMR (CDCl<sub>3</sub>, 400 MHz): δ 7.54 (d, *J* = 8.1 Hz, 2H, CH<sub>Ar</sub>), 7.36 (d, *J* = 8.1 Hz, 2H, CH<sub>Ar</sub>), 3.45 (sex (qt), *J* = 6.9 Hz, 1H, CH), 2.91 (s, 6H, NCH<sub>3</sub>), 2.62 (dd, *J* = 15.3, 6.7 Hz, 1H, CHHCO), 2.54 (dd, *J* = 15.3, 7.3 Hz, 1H, CHHCO), 1.33 (d, *J* = 6.9 Hz, 3H, CH<sub>3</sub>CH<sub>2</sub>).

<sup>13</sup>C NMR (CDCl<sub>3</sub>, 100 MHz): δ 171.3, 150.9, 128.7 (q, *J* = 32.3 Hz), 127.4, 125.5 (q, *J* = 3.8 Hz), 124.4 (q, *J* = 272.4 Hz), 41.5, 37.4, 36.4, 35.7, 21.8.

HRMS (ESI<sup>+</sup>, *m/z*): calcd for C<sub>13</sub>H<sub>17</sub>F<sub>3</sub>NO [M+H]<sup>+</sup>: 260.12568, found: 260.12609.

HPLC: Chiracel-ADH, *n*-heptane/*i*-PrOH 98:2, 0.5 mL/min, 40 °C, detection at 208 nm. Retention time (min): 23.0 (major) and 28.3 (minor).

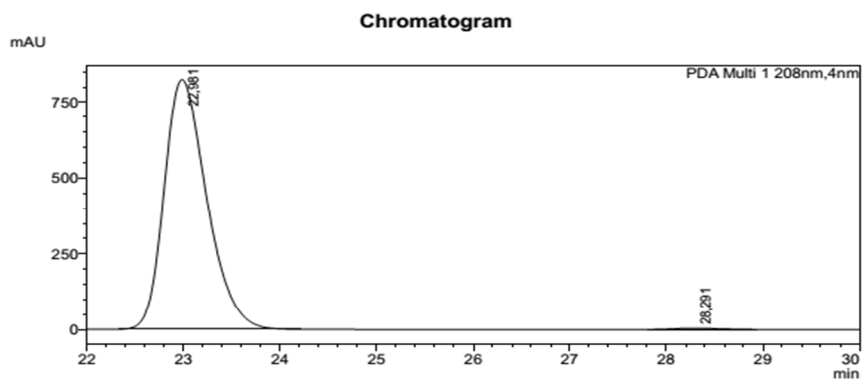

**Peak Table**

| PDA Ch1 208nm |           |          |        |        |
|---------------|-----------|----------|--------|--------|
| Peak#         | Ret. Time | Area     | Height | Conc.  |
| 1             | 22.981    | 25270631 | 824055 | 99.449 |
| 2             | 28.291    | 140013   | 4380   | 0.551  |
| Total         |           | 25410644 | 828435 |        |

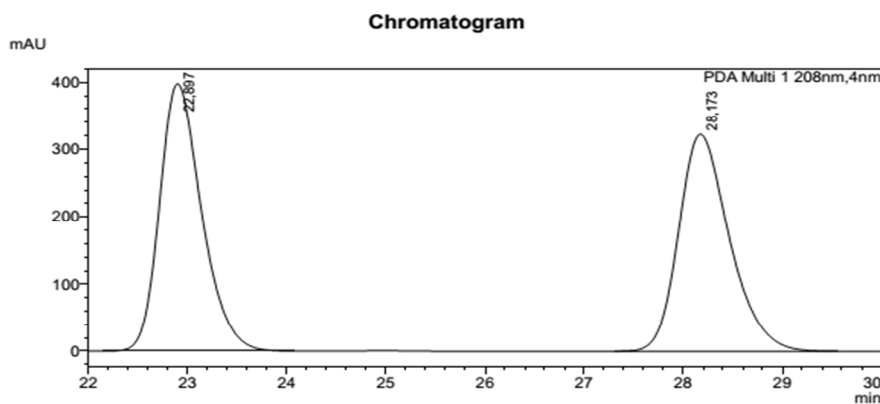

**Peak Table**

| PDA Ch1 208nm |           |          |        |        |
|---------------|-----------|----------|--------|--------|
| Peak#         | Ret. Time | Area     | Height | Conc.  |
| 1             | 22.897    | 11754995 | 398184 | 50.460 |
| 2             | 28.173    | 11540592 | 322553 | 49.540 |
| Total         |           | 23295586 | 720738 |        |

**(S)-5,5,5-trifluoro-N,N-bis(4-methoxybenzyl)-3-methylpentanamide (3j)**

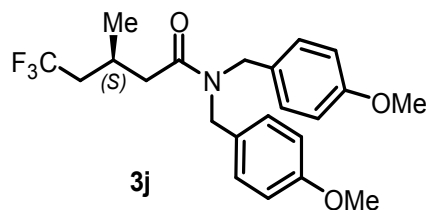

The reaction was performed with 0.1 mmol **1y**, CuBr·SMe<sub>2</sub> (1.03 mg, 0.005 mmol, 5 mol%), ligand **L1** (3.84 mg, 0.006 mmol, 6 mol%), BF<sub>3</sub>·Et<sub>2</sub>O (37 μL, 0.3 mmol), MeMgBr (0.3 mmol, 3.0 M in Et<sub>2</sub>O), 1.0

mL of DCM at -78 °C. Product **3j** was obtained as a colorless oil after column chromatography (SiO<sub>2</sub>, Et<sub>2</sub>O) [62% yield, 99% *ee*].

<sup>1</sup>H NMR (CDCl<sub>3</sub>, 400 MHz): δ 7.14 (d, *J* = 8.4 Hz, 2H, CH<sub>Ar</sub>), 7.04 (d, *J* = 8.5 Hz, 2H, CH<sub>Ar</sub>), 6.90 (d, *J* = 8.5 Hz, 2H, CH<sub>Ar</sub>), 6.85 (d, *J* = 8.4 Hz, 2H, CH<sub>Ar</sub>), 4.52 (s, 2H, NCH<sub>2</sub>), 4.35 (s, 2H, NCH<sub>2</sub>), 3.82 (s, 3H, OCH<sub>3</sub>), 3.80 (s, 3H, OCH<sub>3</sub>), 2.58-2.24 (m, 4H, CH<sub>2</sub>), 2.08-1.94 (m, 1H, CH), 1.10 (d, *J* = 6.6 Hz, 3H, CH<sub>3</sub>).

<sup>19</sup>F NMR (CDCl<sub>3</sub>, 377 MHz): δ -63.0 (t, *J* = 11.3 Hz).

<sup>13</sup>C NMR (CDCl<sub>3</sub>, 100 MHz): δ 171.5, 159.3, 159.1, 129.8, 129.6, 128.3, 127.7, 127.2 (q, *J* = 277.8 Hz), 114.5, 114.1, 55.5, 55.4, 49.2, 47.5, 39.8, 29.8, 25.4 (q, *J* = 2.4 Hz), 20.3.

HRMS (ESI+, *m/z*): calcd for C<sub>22</sub>H<sub>27</sub>F<sub>3</sub>NO<sub>3</sub> [M+H]<sup>+</sup>: 410.19375, found: 410.19382.

HPLC: Chiracel-ODH, *n*-heptane/*i*-PrOH 99:1, 0.5 mL/min, 40 °C, detection at 226 nm. Retention time (min): 67.4 (major) and 75.6 (minor).

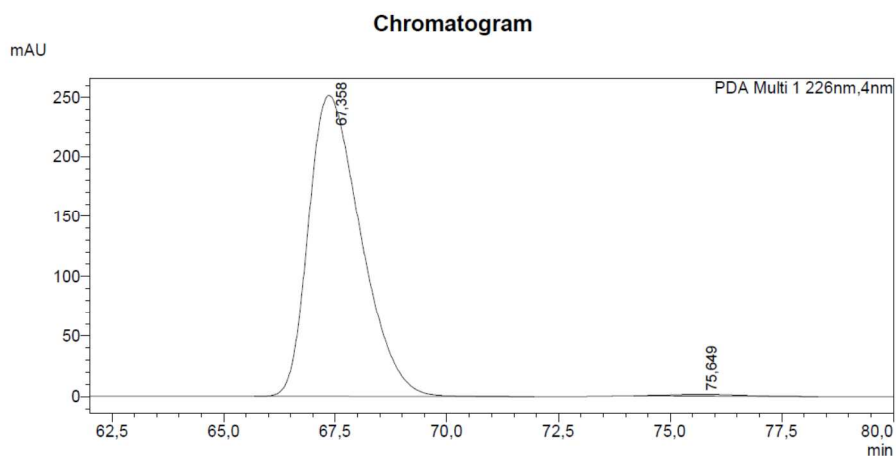

| Peak# | Ret. Time | Area     | Height | Conc.  |
|-------|-----------|----------|--------|--------|
| 1     | 67.358    | 20388212 | 251811 | 99.346 |
| 2     | 75.649    | 134315   | 1415   | 0.654  |
| Total |           | 20522527 | 253226 |        |



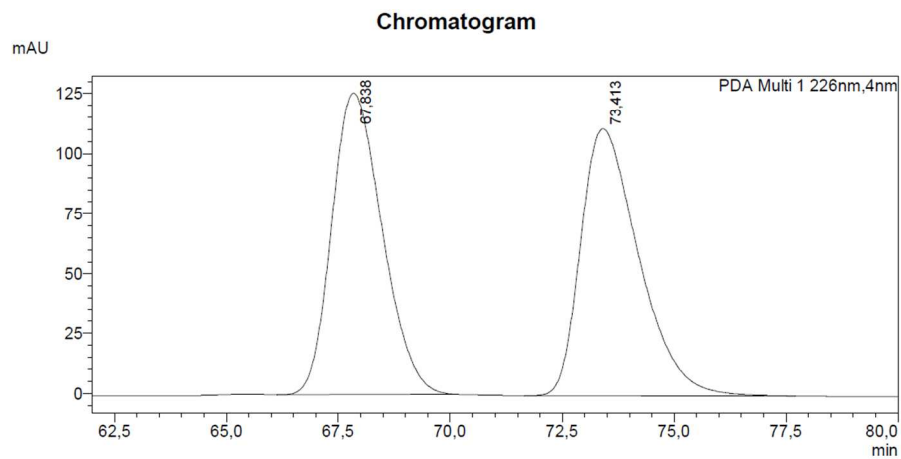

***N,N*-Dimethyl-3-methyl-butanamide (**3k**)<sup>1</sup>**

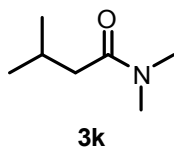

The reaction was performed with 0.2 mmol **1b**, CuBr SMe<sub>2</sub> (2.06 mg, 0.01 mmol, 5 mol%), TMSOTf (72 μL, 0.4 mmol), MeMgBr (0.4 mmol, 3.0 M in Et<sub>2</sub>O), 2.0 mL of DCM at -10 °C. Product **3k** was obtained as a colorless oil after column chromatography (SiO<sub>2</sub>, pentane:Et<sub>2</sub>O 1:1) [63% yield].

<sup>1</sup>H NMR (CD<sub>2</sub>Cl<sub>2</sub>, 400 MHz): δ 2.93 (s, 3H, NCH<sub>3</sub>), 2.84 (s, 3H, NCH<sub>3</sub>), 2.12 (d, *J* = 7.0 Hz, 2H, CH<sub>2</sub>CO), 2.00 (nonuplet, *J* = 6.7 Hz, 1H, CH<sub>2</sub>CH), 0.87 (d, *J* = 6.6 Hz, 6H, (CH<sub>3</sub>)<sub>2</sub>CH).

## 9. Deprotection of protecting group at the Nitrogen

### (*R*)-3-Ethyl-hexanamide (**4**)

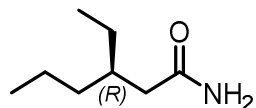

**4**

The product **4** was prepared by a literature procedure.<sup>16</sup> **2e** (0.2 mmol) was dissolved in trifluoroacetic acid (4.0 mL) and heated to reflux for 17 h at 90 °C. The product solution was concentrated under reduced pressure. After the addition of DCM (4 mL), the organic layer was washed with saturated aqueous NaHCO<sub>3</sub> (4 mL). The aqueous layer was extracted with DCM (10 mL × 3) and the combined organic layers were washed with brine, dried over MgSO<sub>4</sub> and concentrated under reduced pressure. The crude product was purified by column chromatography on silica gel (SiO<sub>2</sub>, Et<sub>2</sub>O) to afford product **4** as a white powder [92% yield, 98% ee].

<sup>1</sup>H NMR (CDCl<sub>3</sub>, 400 MHz): δ 5.37 (br s, 2H, NH<sub>2</sub>), 2.14 (dd, *J* = 14.5, 7.5 Hz, 1H, CHHCO), 2.13 (dd, *J* = 14.5, 6.9 Hz, 1H, CHHCO), 1.85-1.80 (m, 1H, CH), 1.43-1.25 (m, 6H, CH<sub>2</sub>), 0.90 (t, *J* = 6.6 Hz, 3H, CH<sub>3</sub>), 0.88 (t, *J* = 7.4 Hz, 3H, CH<sub>3</sub>).

<sup>13</sup>C NMR (CDCl<sub>3</sub>, 100 MHz): δ 176.0, 40.8, 36.5, 35.6, 26.2, 19.8, 14.5, 10.8.

HRMS (ESI+, *m/z*): calcd for C<sub>8</sub>H<sub>18</sub>NO [M+H]<sup>+</sup>: 144.13829, found: 144.13828.

HPLC: Chiracel-ASH, *n*-heptane/*i*-PrOH 90:10, 0.5 mL/min, 40 °C, detection at 204 nm. Retention time (min): 13.9 (major) and 16.0 (minor).

### Chromatogram

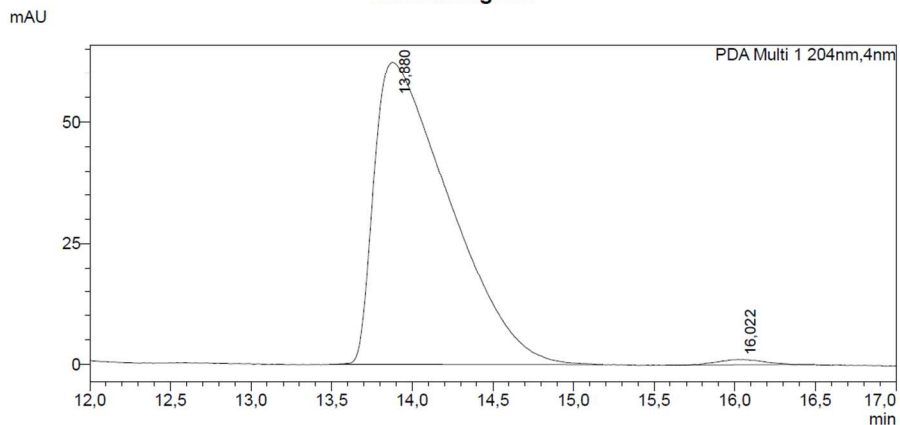

### Peak Table

| PDA Ch1 204nm |           |         |        |        |
|---------------|-----------|---------|--------|--------|
| Peak#         | Ret. Time | Area    | Height | Conc.  |
| 1             | 13,880    | 2023839 | 62325  | 98,978 |
| 2             | 16,022    | 20904   | 1085   | 1,022  |
| Total         |           | 2044744 | 63410  |        |

### Chromatogram

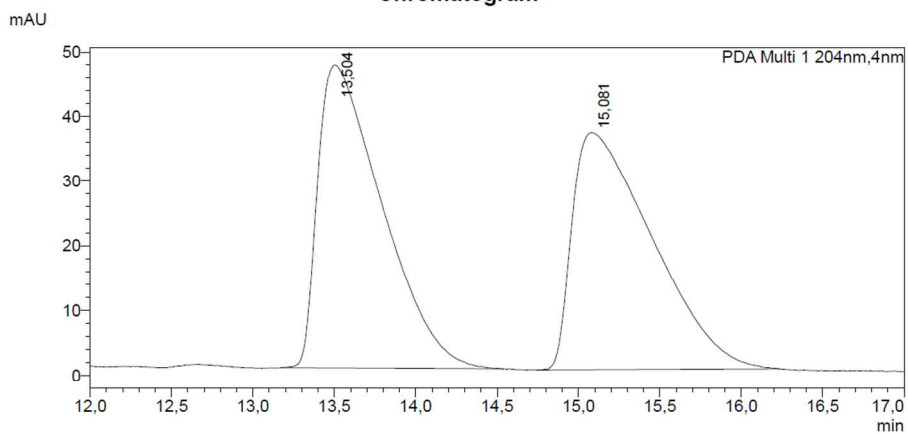

### Peak Table

| PDA Ch1 204nm |           |         |        |        |
|---------------|-----------|---------|--------|--------|
| Peak#         | Ret. Time | Area    | Height | Conc.  |
| 1             | 13,504    | 1281122 | 46806  | 50,686 |
| 2             | 15,081    | 1246450 | 36537  | 49,314 |
| Total         |           | 2527572 | 83343  |        |

## 10. Transformation of amide into $\beta$ - and $\gamma$ -branched amines

### (*R*)-3-Ethyl-hexan-1-amine (**5**)

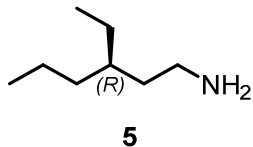

A solution of **4** (50.1 mg, 0.35 mmol, 97% *ee*) in anhydrous THF (3.5 mL) cooled at 0 °C was added under nitrogen a solution of LiAlH<sub>4</sub> (1.0 M in Et<sub>2</sub>O, 0.7 mL, 0.7 mmol). The resulting mixture was stirred at ambient temperature (1 h) and then heated to 60 °C for 18 h. The reaction was quenched with NaOH (2 M, 2.0 mL) and extracted with DCM (10 mL × 3). The organic layer was then dried (MgSO<sub>4</sub>), filtered and concentrated under reduced pressure. The residue was redissolved in Et<sub>2</sub>O (5 mL), filtered and concentrated under reduced pressure to afford product **5** as a light yellow oil [85% yield, 97% *ee*].

<sup>1</sup>H NMR (CDCl<sub>3</sub>, 400 MHz):  $\delta$  2.68 (t, 2H, *J* = 7.4 Hz, CH<sub>2</sub>NH<sub>2</sub>), 1.43-1.13 (m, 11H, CH, CH<sub>2</sub>, NH<sub>2</sub>), 0.88 (t, *J* = 6.7 Hz, 3H, CH<sub>3</sub>), 0.84 (t, *J* = 7.4 Hz, 3H, CH<sub>3</sub>).

<sup>13</sup>C NMR (CDCl<sub>3</sub>, 100 MHz):  $\delta$  40.1, 37.8, 36.5, 35.7, 26.0, 19.8, 14.6, 10.8.

HRMS (ESI+, *m/z*): calcd for C<sub>8</sub>H<sub>20</sub>N [M+H]<sup>+</sup>: 130.15903, found: 130.15904.

The *ee* of this compound was determined from the corresponding *N*-benzoyl derivate: HPLC: Chiracel-ODH, *n*-heptane/*i*-PrOH 98:2, 0.5 mL/min, 40 °C, detection at 223 nm. Retention time (min): 95.0 (major) and 101.7 (minor).

### Chromatogram

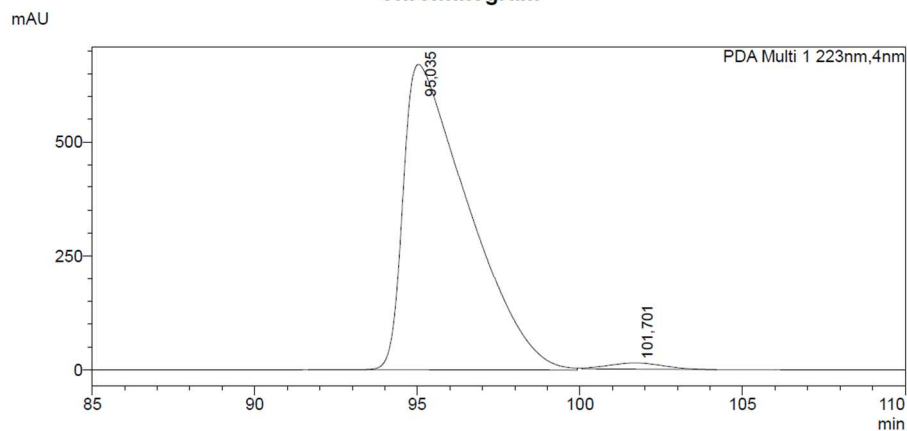

### Peak Table

| PDA Ch1 223nm |           |          |        |        |
|---------------|-----------|----------|--------|--------|
| Peak#         | Ret. Time | Area     | Height | Conc.  |
| 1             | 95.035    | 93360356 | 671522 | 98,299 |
| 2             | 101.701   | 1615940  | 13675  | 1,701  |
| Total         |           | 94976296 | 685197 |        |

### Chromatogram

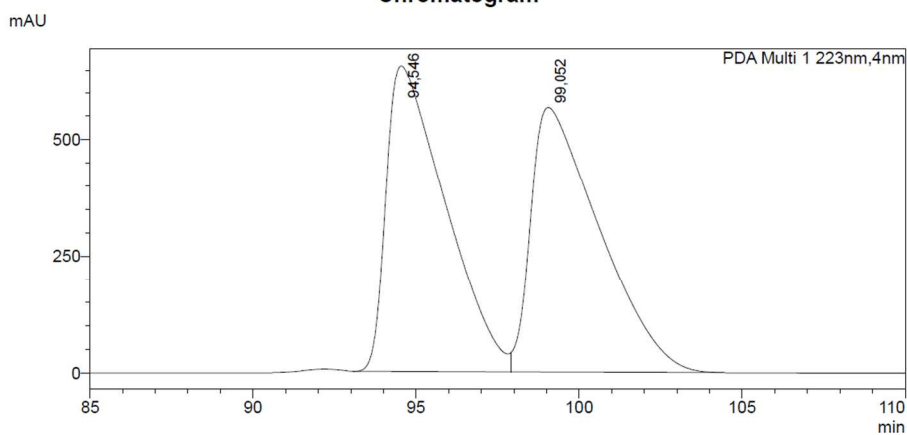

### Peak Table

| PDA Ch1 223nm |           |           |         |        |
|---------------|-----------|-----------|---------|--------|
| Peak#         | Ret. Time | Area      | Height  | Conc.  |
| 1             | 94.546    | 82717020  | 655920  | 49,874 |
| 2             | 99.052    | 83133367  | 566070  | 50,126 |
| Total         |           | 165850387 | 1221990 |        |

**(R)-2-Ethylpentan-1-amine hydrochloride (6)**

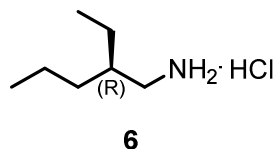

The compound was prepared following the literature procedure.<sup>20</sup> *m*-Chloroperbenzoic acid (72% purity, 290 mg, 1.2 mmol) was dried under vacuum for 15 min at room temperature prior to use. To a stirred solution of *m*-CPBA in DCM (1 mL) and water (99  $\mu$ L) was added a 48% aqueous solution of tetrafluoroboric acid (155  $\mu$ L, 1.2 mmol), a 0.89 M DCM solution of iodobenzene (55  $\mu$ L, 0.05 mmol) and then **4** (143.1 mg, 1.0 mmol, 97% *ee*) at 25 °C under nitrogen and the mixture was stirred for 48 h. A 10% aqueous HCl solution (2 mL) was added and the reaction mixture was extracted with DCM four times. Combined organic phase was extracted with 10% aqueous HCl solution two times. Combined aqueous phase was concentrated under reduced pressure. Product **6** was obtained as a white solid in 91% yield and 97% *ee*.

<sup>1</sup>H NMR (D<sub>2</sub>O, 400 MHz):  $\delta$  2.84 (d,  $J$  = 6.1 Hz, 2H, CH<sub>2</sub>NH<sub>2</sub>), 1.61-1.51 (m, 1H, CH), 1.32-1.15 (m, 6H, CH<sub>2</sub>), 0.80-0.76 (m, 6H, CH<sub>3</sub>).

<sup>13</sup>C NMR (D<sub>2</sub>O, 100 MHz):  $\delta$  45.0, 39.3, 34.5, 25.3, 21.3, 15.9, 12.1.

HRMS (ESI+, *m/z*): calcd for C<sub>7</sub>H<sub>18</sub>N [M+H]<sup>+</sup>: 116.14338, found: 116.14317.

The *ee* of this compound was determined from the corresponding *N*-benzoyl derivative: HPLC: Chiralcel-OBH, *n*-heptane/*i*-PrOH 99:1, 0.5 mL/min, 40 °C, detection at 222 nm. Retention time (min): 52.5 (minor) and 55.4 (major).

### Chromatogram

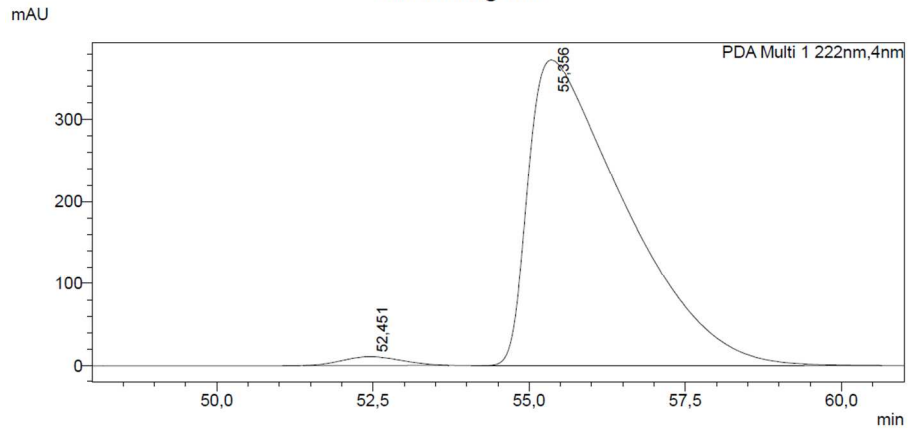

### Peak Table

| PDA Ch1 222nm |           |          |        |        |
|---------------|-----------|----------|--------|--------|
| Peak#         | Ret. Time | Area     | Height | Conc.  |
| 1             | 52.451    | 692661   | 10613  | 1.696  |
| 2             | 55.356    | 40153969 | 372474 | 98.304 |
| Total         |           | 40846630 | 383086 |        |

### Chromatogram

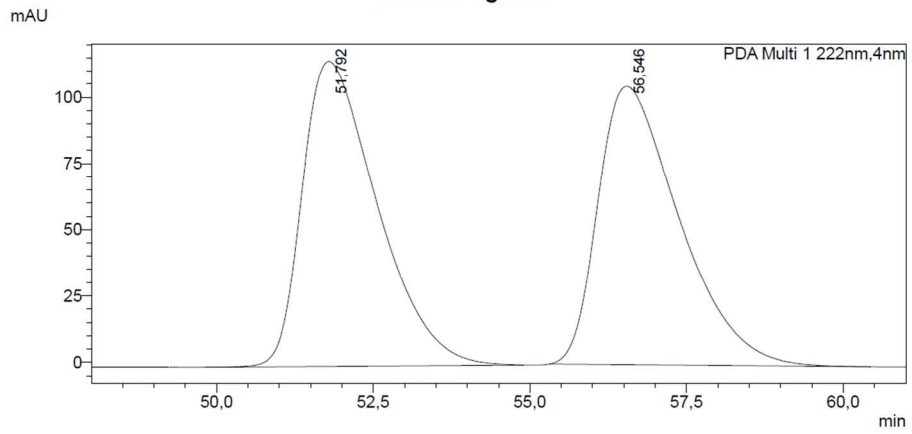

### Peak Table

| PDA Ch1 222nm |           |          |        |        |
|---------------|-----------|----------|--------|--------|
| Peak#         | Ret. Time | Area     | Height | Conc.  |
| 1             | 51.792    | 9577222  | 115215 | 50.288 |
| 2             | 56.546    | 9467523  | 104978 | 49.712 |
| Total         |           | 19044745 | 220193 |        |

## 11. Catalytic ACA followed by intramolecular trapping

### (1*R*,2*R*)-2-ethyl-*N,N*-dimethylcyclopentane-1-carboxamide (**7**)

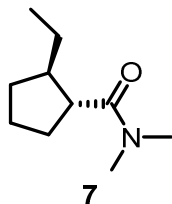

In a flame-dried Schlenk tube equipped with septum and magnetic stirring bar, CuBr·SMe<sub>2</sub> (2.06 mg, 0.01 mmol, 5 mol%), and ligand **L1** (7.68 mg, 0.012 mmol, 6 mol%) were dissolved in DCM (2 mL) and stirred under nitrogen atmosphere for 20 min. Amide **1v** (0.2 mmol) was added at once. After stirring for 5 min. at RT the reaction mixture was cooled to –78 °C and EtMgBr (0.4 mmol, 3.0 M in Et<sub>2</sub>O) was added. Immediately after TMSOTf (72 μL, 0.4 mmol) was added. After stirring at –78 °C for 18 h, the reaction was warmed up to RT and stirred for 8 h. The resulting reaction mixture was quenched with saturated aqueous NH<sub>4</sub>Cl solution and extracted with DCM (10 mL × 3). Combined organic phases were dried over MgSO<sub>4</sub>, filtered and solvents were evaporated on rotary evaporator. Product **7** was obtained as a colorless oil after column chromatography (SiO<sub>2</sub>, pentane:Et<sub>2</sub>O 1:1) [66% yield, 92% *ee*]. Relative configuration was determined by NOE experiments (Figure S35).

<sup>1</sup>H NMR (CDCl<sub>3</sub>, 400 MHz): δ 3.05 (s, 3H, NCH<sub>3</sub>), 2.96 (s, 3H, NCH<sub>3</sub>), 2.53 (q (dt), *J* = 8.3 Hz, 1H, CHCO), 2.24 (ttt, *J* = 8.6, 8.6, 5.5 Hz, 1H, CHCHCO), 1.99-1.84 (m, 2H, CH<sub>2</sub>), 1.78-1.61 (m, 3H, CH<sub>2</sub>), 1.52-1.41 (m, 1H, CH<sub>2</sub>), 1.29-1.13 (m, 2H, CH<sub>2</sub>), 0.88 (t, *J* = 7.4 Hz, 3H, CH<sub>3</sub>).

<sup>13</sup>C NMR (CDCl<sub>3</sub>, 100 MHz): δ 176.3, 47.6, 45.8, 37.4, 35.8, 31.9, 30.7, 28.0, 24.7, 12.9.

HRMS (ESI+, *m/z*): calcd for C<sub>10</sub>H<sub>20</sub>NO [M+H]<sup>+</sup>: 170.15449, found: 170.15379.

HPLC: Chiracel-OZH, *n*-heptane/*i*-PrOH 95:5, 0.5 mL/min, 40 °C, detection at 202 nm. Retention time (min): 16.0 (major) and 18.7 (minor).



### Chromatogram

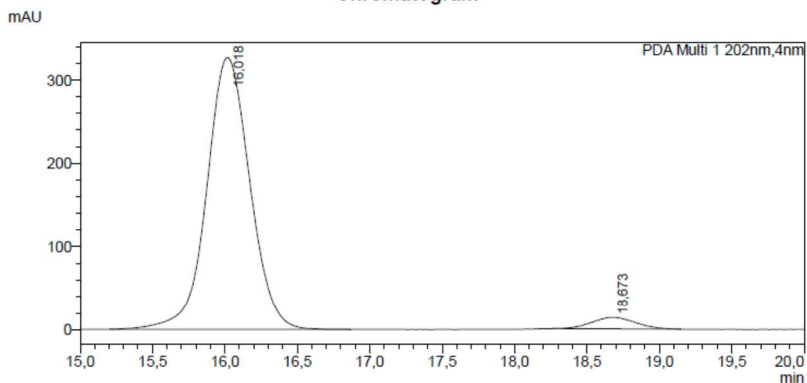

### Peak Table

| PDA Ch1 202nm |           |         |        |        |
|---------------|-----------|---------|--------|--------|
| Peak#         | Ret. Time | Area    | Height | Conc.  |
| 1             | 16,018    | 6752737 | 326541 | 95,871 |
| 2             | 18,673    | 290809  | 13683  | 4,129  |
| Total         |           | 7043547 | 340224 |        |

### Chromatogram

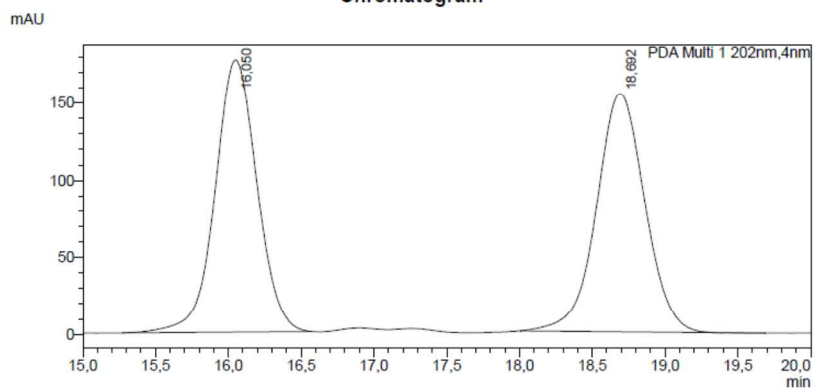

### Peak Table

| PDA Ch1 202nm |           |         |        |        |
|---------------|-----------|---------|--------|--------|
| Peak#         | Ret. Time | Area    | Height | Conc.  |
| 1             | 16,050    | 3549085 | 176667 | 49,796 |
| 2             | 18,692    | 3578234 | 154526 | 50,204 |
| Total         |           | 7127318 | 331193 |        |

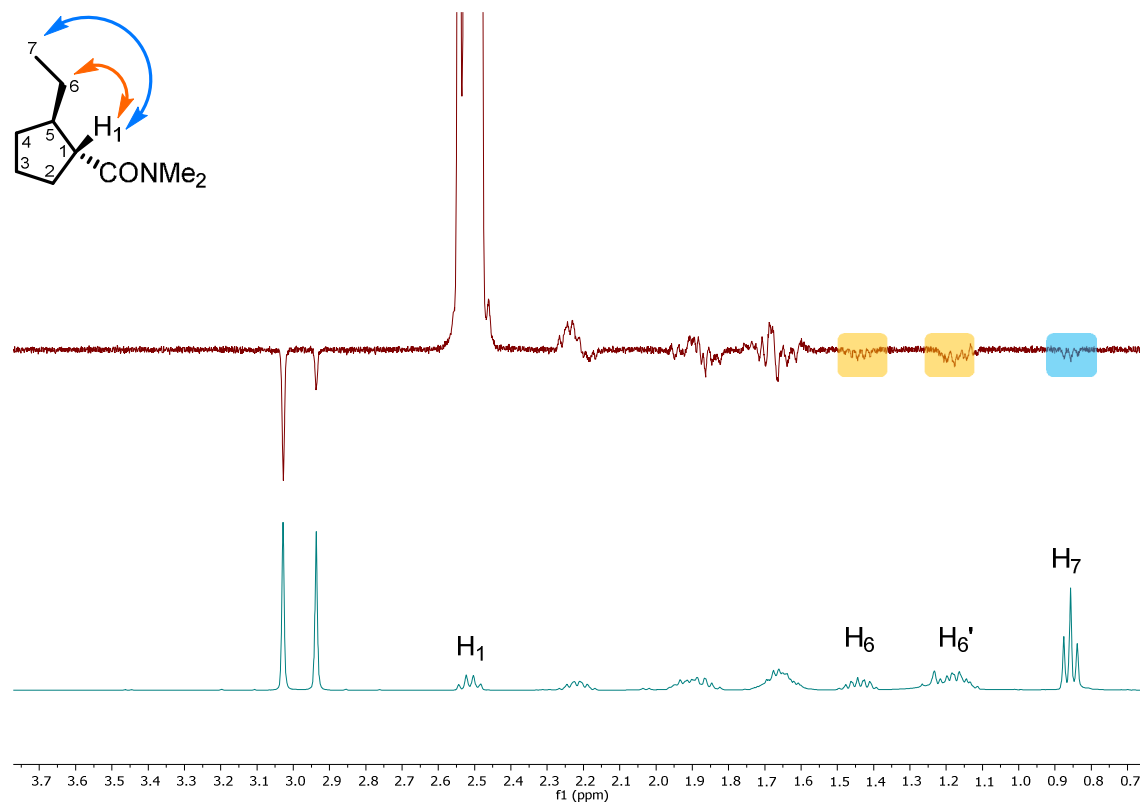

**Figure S35.**  $^1\text{H}$  NMR and 1D NOE experiment of **7**. Selective irradiation on  $\text{H}_1$  showed NOE with ethyl moiety ( $\text{H}_6$  and  $\text{H}_7$ , highlighted) which are positioned on the same side of the ring.

## 12. References

- (1) See reference 15 in the manuscript: Biswas, K.; Woodward, S. *Tetrahedron: Asymmetry* **2008**, *19*, 1702-1708.
- (2) Grubbs, R. H.; Wenzel, A. G.; O'Leary, D. J.; Khosravi, E. *Handbook of Metathesis*; Wiley-VCH, 2015.
- (3) Pace, V.; Rae, J. P.; Procter, D. J. *Org. Lett.* **2014**, *16*, 476-479.
- (4) Casamitjana, N.; López, Virginia; Jorge, Angela; Bosch, Joan; Molins, Elies; Roig, A. *Tetrahedron* **2000**, *56*, 4027-4042.
- (5) Hua, D. H.; Zhang, F.; Chen, J.; Robinson, P. D. *J. Org. Chem.* **1994**, *59*, 5084-5087.

- (6) Liu, L.; L, Hang; Wang, H.; Yang, Ch.; Zhang, X.; Zhang-Negrerie, D.; Du, Y.; Zhao, K. *Org. Lett.* **2013**, *15*, 2906-2909.
- (7) Evans, D. A.; Fandrick, K. R.; Song, H.-J. *J. Am. Chem. Soc.* **2005**, *127*, 8942-8943.
- (8) Ando, K.; Tsuji, E.; Ando, Y.; Kunitomo, J.-I.; Kobayashi, R.; Yokomizo, T.; Shimizu, T.; Yamashita, M.; Ohta, S.; Nabe, T.; Kohno, S.; Ohishi, Y. *Org. Biomol. Chem.* **2005**, *3*, 2129-2139.
- (9) Pineschi, M.; Del Moro, F.; Gini, F.; Minnaard, A. J.; Feringa, B. L. *Chem. Commun.* **2004**, 1244-1245.
- (10) Kojima, S.; Inai, H.; Hidaka, T.; Fukuzaki, T.; Ohkata, K. *J. Org. Chem.* **2002**, *67*, 4093-4099.
- (11) Ruan, J.; Li, X.; Saidi, O.; Xiao, J. *J. Am. Chem. Soc.* **2008**, *130*, 2424-2425.
- (12) Yan, H.; Yang, H.; Lu, L.; Liu, D.; Rong, G.; Mao, J. *Tetrahedron* **2013**, *69*, 7258-7263.
- (13) Duffey, M. O.; Vos, T. J.; Adams, R.; Alley, J.; Anthony, J.; Barret, C.; Bharathan, I.; Bowman, D.; Bump, N. J.; Chau, R.; Cullis, C.; Driscoll, D. L.; Elder, A.; Forsyth, N.; Frazer, J.; Guo, J.; Guo, L.; Hyer, M. L.; Janowick, D.; Kulkarni, B.; Lai, S.-J.; Lasky, K.; Li, G.; Li, J.; Liao, D.; Little, J.; Peng, B.; Qian, M. G.; Reynolds, D. J.; Rezaei, M.; Scott, M. P.; Sells, T. B.; Shinde, V.; Shi, Q. J.; Sintchak, M. D.; Soucy, F.; Sprott, K. T.; Stroud, S. G.; Nestor, M.; Visiers, I.; Weatherhead, G.; Ye, Y.; D'Amore, N. *J. Med. Chem.* **2012**, *55*, 197-208.
- (14) Ye, M.; Gao, G.-L.; Yu, J.-Q. *J. Am. Chem. Soc.* **2011**, *133*, 6964-6967.
- (15) Kobeissi, M.; Cherry, K.; Jomaa, W. *Synth. Commun.* **2013**, *43*, 2955-2965.
- (16) Nagaki, A.; Takahashi, Y.; Yoshida, J.-I. *Angew. Chem., Int. Ed. Engl.* **2016**, *55*, 5327-5331.
